# Supplementary material
Source: PubMed Central journal article supplement (PMC2672522)
Supplement: 0811248106_0811248106SI.pdf [file 0811248106_0811248106SI.pdf]

# Supporting Information

Thorpe et al. 10.1073/pnas.0811248106

## SI Methods

**Image Analysis.** To reconstruct a 3-dimensional fluorescent image of the cells a stack of vertically-separated fluorescent images (z-stack) was deconvolved using Volocity deconvolution software (Improvision, Waltham, MA USA). The resulting volume was used to calculate the amount of fluorescence (in relative units) for each kinetochore or nucleus using Volocity software as previously described (3, 4). Briefly, a 3-dimensional volume within the image was selected, containing either the nucleus (for the histones) or the kinetochore (for kinetochore proteins) and quantified. To control for background, an extracellular region was also selected and measured. We subtract the background fluorescence levels from those of either the nucleus or the kinetochore to derive the relative units provided in the [Dataset S1](#) (more information concerning the levels of cellular background is provided below). The fluorescence signal generated from fluorescently-tagged protein equates with their concentration, as shown by numerous studies (for example see ref. 5). However, we wished to perform a number of controls (in addition to those described in the printed text of the manuscript) to ensure that the fluorescence measurements made using our Zeiss microscope and the subsequent image analysis using Volocity deconvolution software are representative of the amount of fluorescence in the yeast cells.

**Deconvolution.** Although the deconvolution algorithm is a linear function, we were concerned that the process would distort the relative levels of fluorescence of 2 objects in an image. Since our analysis depends on this quantitation, we used fluorescent beads (Tetraspeck Fluorescent Microspheres, Molecular Probes) to determine the effects of iterative restorations using Volocity deconvolution software. We find that although Volocity deconvolution can affect the relative intensity of fluorescence, it does not affect the ratio of intensities between 2 fluorescent foci in the same image (two examples are shown in [Fig. S5](#)).

**Cellular Background.** To rule out the possibility that the asymmetry we observe is caused by the background fluorescence in the mother lineage, we checked the background fluorescence levels of the mother and the bud. This is particularly pertinent for the study of spores, since spore wall components, which are often retained after germination, are autofluorescent in the blue channel (CFP, 480 nm). We find that the background levels of fluorescence are equivalent in the mother versus bud in several of the strains used in this study. For spores derived from the diploid strain, W7247 (*MTW1-YFP/MTW1-CFP*), the mean cellular background m/b ratio at the first division for CFP is 1.1 (SD = 0.12) and for YFP 1.0 (SD = 0.03). For spores derived from 2 other diploid strains W7909 and W7908 (*CTF19-YFP/CTF19-CFP* and *ASK1-YFP/ASK1-CFP* respectively) the equivalent ratios are 1.2 and 1.2 for CFP respectively (SD = 0.01 and 0.13, respectively) and for YFP 1.0 and 1.0 respectively (SD = 0.04 and 0.03, respectively).

To obtain another independent confirmation that the background in the mother cell is not the cause of the asymmetry found in our analysis, we compared fluorescence intensity with m/b ratio. If high background fluorescence caused the asymmetry in the mother lineage, we would expect to find that kinetochore foci with a low intensity of fluorescence would show greater levels of asymmetry (since they would be more sensitive to the background levels). For experiments using *Mtw1* and *Ask1*, we plotted the intensity of nonencoded fluorescence in the kinetochore foci versus

the m/b ratio. There is no correlation (positive or negative) between the intensity of fluorescence and the m/b ratios for any of the experiments that we examined ([Fig. S6](#)).

**Z Plane.** It has been observed that the distance of the fluorescence signal from the coverslip affects the measured fluorescence intensity (5). Both of our cell preparation methods put the yeast cells adjacent to the coverslip and in all of our images the kinetochore pairs in the mother and bud were approximately equivalent distances from the coverslip with a variation of  $\approx 2 \mu\text{m}$ . Using a variety of fluorescent proteins we have determined the effect of z position on fluorescence intensity. As published previously (5), we find that fluorescence intensity decreases with increasing distance from the coverslip. However, this effect is  $<10\%$  at  $5 \mu\text{m}$  with our system.

**Dilution of Kinetochore Proteins.** It is relatively straightforward to assay the dilution of the nonencoded histone *Hta1* (histone *H2A*) and we find that it dilutes by approximately half at each division. Since, we are measuring the total fluorescence in the nucleus, this measurement likely includes the free and DNA-bound *Hta1*. In contrast, we do not measure the total amounts of *Mtw1*, *Ctf19*, *Ask1* and *Ndc10* in the nucleus—we only measure fluorescence in the kinetochore focus. Since kinetochore proteins can exchange between the free pools in the nucleus and the kinetochore structure, the dilution of non-encoded kinetochore proteins is more complex than that of the histone. Our study was not designed to address the stability of proteins in the kinetochore structure, nor do we measure the exchange of kinetochore proteins between the kinetochore structure and the nucleus as a whole.

**Symmetric Division of TetR-mRFP.** Although we find that *Hta1* segregates symmetrically, we also measured a different specific focus within the nucleus as another negative control. We used the tetracycline repressor tagged with RFP, which binds specifically to an array of Tet operator sequences integrated into chromosome 3. We examined the intensity of the RFP foci in cells derived from the spore in the first postmeiotic division obtained from a homozygous diploid parent (W8368). We find that the m/b ratio is 1.2 ([Dataset S1](#)), indicative of symmetrical segregation of this protein.

In summary, there are a number of potential sources of error in the quantitation of fluorescence using microscopy. *In toto*, we measured (and compared) fluorescence levels in adjacent cells from the same images along with structure of interest, we conclude that the measured fluorescence intensities are indicative of the amount of tagged protein within the cells.

**Rad52.** We examined spores derived from diploid cells encoding *Rad52-YFP* to determine whether foci arise during the first cell division. We captured fluorescence, images as previously reported (3), every 10 min as the spores and their progeny underwent divisions. It should be noted that although a 10-min time interval reduces photobleaching, it likely prevents us from observing some short-lived *Rad52-YFP* foci. We found that *Rad52-YFP* foci form in dividing spores ( $\approx 18\%$  of S phases) and also in their progeny, and this result was not detectably different from the frequency in haploid cells. Additionally, we derived spores from a diploid strain encoding *Rad52-YFP/Rad52-CFP* and followed these spores through 2 divisions. We found that m/b ratios for *Rad52* protein in the nucleus are equivalent in the mother lineage versus other lineages (m/b ratios  $\approx 1.4$  in all lineages).

1. Thomas BJ, Rothstein R (1989) The genetic control of direct-repeat recombination in *Saccharomyces*: the effect of rad52 and rad1 on mitotic recombination at *GAL10*, a transcriptionally regulated gene. *Genetics* 123:725–738.
2. Zou H, Rothstein R (1997) Holliday junctions accumulate in replication mutants via a RecA homolog-independent mechanism. *Cell* 90:87–96.
3. Lisby M, Barlow JH, Burgess RC, Rothstein R (2004) Choreography of the DNA damage response: spatiotemporal relationships among checkpoint and repair proteins. *Cell* 118:699–713.
4. Thorpe PH, Marrero VA, Savitzky MH, Sunjevaric I, Rothstein R (2006) Cells expressing murine *RAD52* splice variants favor sister chromatid repair. *Mol Cell Biol* 26:3752–3763.
5. Joglekar AP, Bouck DC, Molk JN, Bloom KS, Salmon ED (2006) Molecular architecture of a kinetochore-microtubule attachment site. *Nat Cell Biol* 8:581–585.



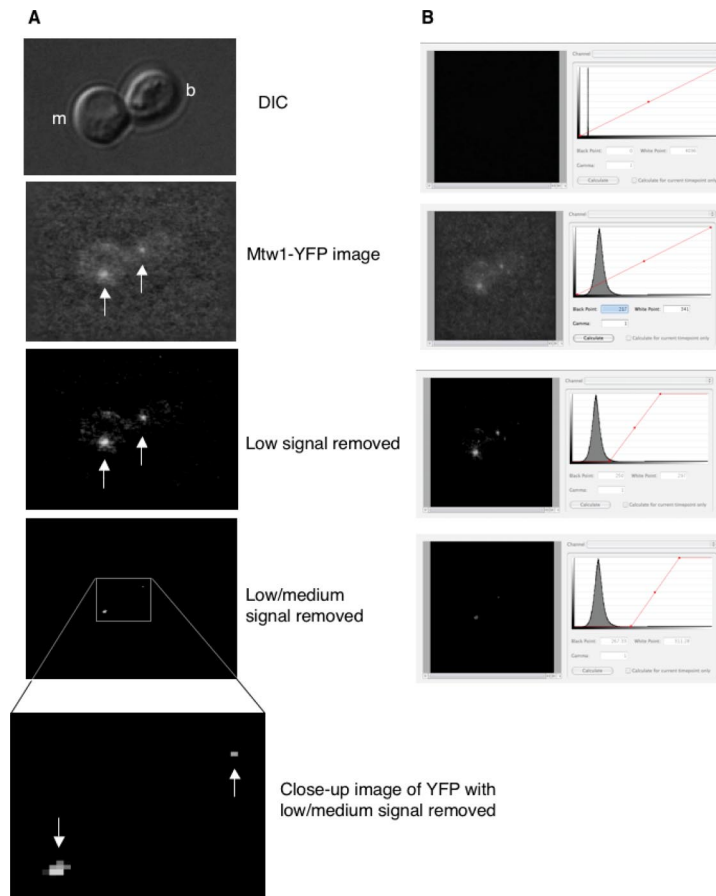

**Fig. S2.** (A) An example of a time-lapse image of the first division of a spore containing the *MTW1* gene tagged with YFP (derived from a YFP/CFP diploid). The *Top* DIC image shows the mother cell (*m*, *Left*) and bud cell (*b*, *Right*). Below, in the deconvolved YFP image, the asymmetry between the mother and bud is not clearly apparent, the 2 kinetochores are indicated with white arrows. Quantitation of the kinetochore fluorescence (minus background) indicates a mother to bud ratio of 2.42 (mother kinetochore = 67.2 relative units and bud kinetochore = 27.8 relative units, see [Dataset S1](#), *Mtw1* spores #MTW1-Z). (*Lower*) The same YFP image with the low signal and then the low to medium signal removed (see below for an explanation of the method). *Lower* is a magnification of the boxed region of the enhanced YFP image containing the 2 kinetochores to illustrate the asymmetry. (B) Examples are shown of the contrast enhancements performed on the deconvolved YFP images in [Fig. S2A](#). Screen captures of the Volocity software contrast enhancement feature are shown. Each pixel in the fluorescence images contains 4096 levels of fluorescence. The “black point” is the level (of signal) for an image pixel to be represented as black and the “white point” is the level (of signal) for an image pixel to be represented as white. (*Upper*) No signal is visible, with a black point set to 0 and a white point set to 4096, the full range measured in our experiments. The next image shows the black point increased to 241 and the white point reduced to 341. By progressively increasing the black point and reducing the white point it is possible to visualize only the pixels with the highest levels of fluorescence in an image, shown in *Lower*. Importantly, this enhancement is linear and is applied uniformly across an image. (C and D) An example of a time-lapse sequence of images of the first 3 divisions of a spore containing the *MTW1* gene tagged with CFP (derived from a YFP/CFP diploid). In the series of images at *Left*, the *Upper* DIC image shows the mother cell (*m*, *Lower*) and bud cell (*b*, *Upper*). Below, in the CFP image, the 2 kinetochores are indicated with white arrows. (*Lower*) The same CFP image, with the low signal and then the low to medium signal removed. *Lower* is a close-up image of the 2 kinetochores to illustrate the asymmetry. (*Right*) The same format but for the subsequent second cell division. The kinetochore CFP quantitation of these images, produces values as follows, *m* = 333.2, *b* = 174, *mm* = 235, *mb* = 202, *bm* = 202 and *bb* = 168 relative units, full details are provided in [Dataset S1](#) (*Mtw1* spores, MTW1-AK). (D) The same colony as for [Fig. 5C](#), at the third division, to clarify the position of cells, a dotted line indicates the position of the cells in the DIC and fluorescence images. The enhanced CFP image is divided since the mother lineage cell and its progeny (*mmm* and *mmb*) are in a different focal plane to the other cells. The kinetochore CFP quantitation of these images, produces values as follows, *mmm* = 847, *mmb* = 141, *mbm* = 162, *mhb* = 182, *bmm* = 319, *bmb* = 154, *bbm* = 151 and *bbb* = 142 relative units, full details are provided in [Dataset S1](#) (*Mtw1* spores, MTW1-AK). (E) An example of a time-lapse image of the first division of a spore containing the *ASK1* gene tagged with YFP (derived from a YFP/CFP diploid). The *Top* DIC image shows the mother cell (*m*, *Upper*) and bud cell (*b*, *Lower*). Below, in the YFP image, the asymmetry between the mother and bud is not clearly apparent in the deconvolved image, the 2 kinetochores are indicated with white arrows. Quantitation of the kinetochore fluorescence (minus background) indicates a mother to bud ratio of 2.9 (mother kinetochore = 51.1 relative units and bud kinetochore = 17.4 relative units, see [Dataset S1](#), *Ask1* spores, #ASK1-B1). (*Lower*) The same YFP image, with the low signal and then the low to medium signal removed. *Lower* is a close-up image of the 2 kinetochore cluster signals to illustrate the asymmetry. (F) An example of a time-lapse image of the first division of a spore containing the *CTF19* gene tagged with YFP (derived from a YFP/CFP diploid). (*Upper*) DIC image showing the mother cell (*m*, *Left*) and bud cell (*b*, *Right*). Quantitation of the kinetochore fluorescence (minus background) indicates a mother to bud ratio of 1.85 (mother kinetochore = 51 relative units and bud kinetochore = 27.5 relative units, see [Dataset S1](#), *Ctf19* spores #CTF19-C3). (*Lower*) The same YFP image, with the low signal and then the low to medium signal removed. *Lower* is a close-up image of the 2 kinetochores to illustrate the asymmetry. (G) An example of a time-lapse image of the first division of a spore containing the *NDC10* gene tagged with YFP (derived from a YFP/CFP diploid). (*Upper*) DIC image showing the mother cell (*m*, *Right*) and bud cell (*b*, *Left*). Below, in the YFP image, the 2 kinetochores are indicated with white arrows. Quantitation of the kinetochore fluorescence (minus background) indicates a mother to bud ratio of 1.97 (mother kinetochore = 129.3 relative units and bud kinetochore = 65.6 relative units, see [Dataset S1](#), *Ndc10* spores, #NDC10-C9). (*Lower*) The same YFP image, with the low signal and then the low to medium signal removed. *Lower* is a close-up image of the 2 kinetochores to illustrate the asymmetry.

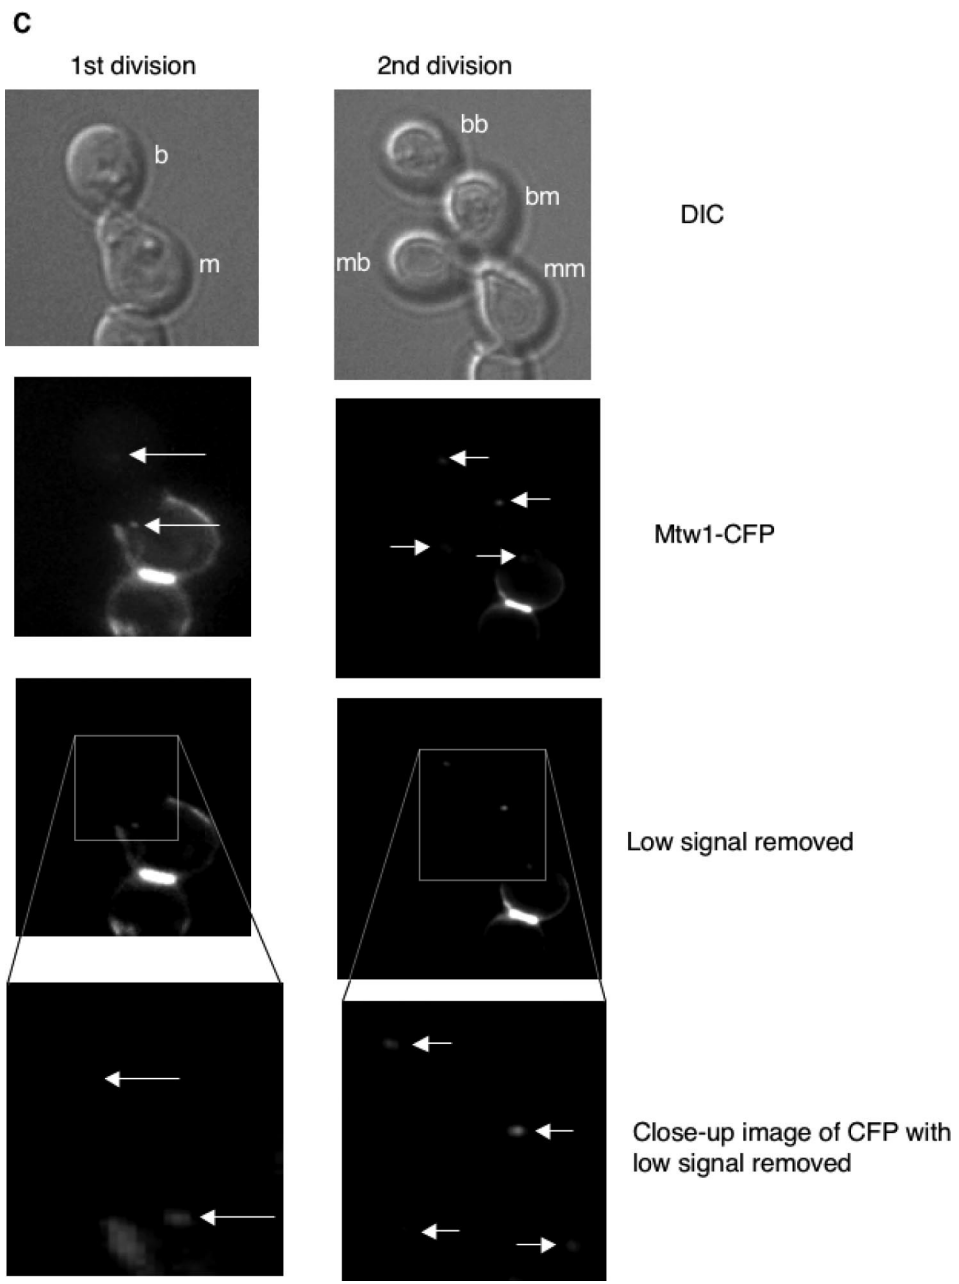

Fig. S2C.

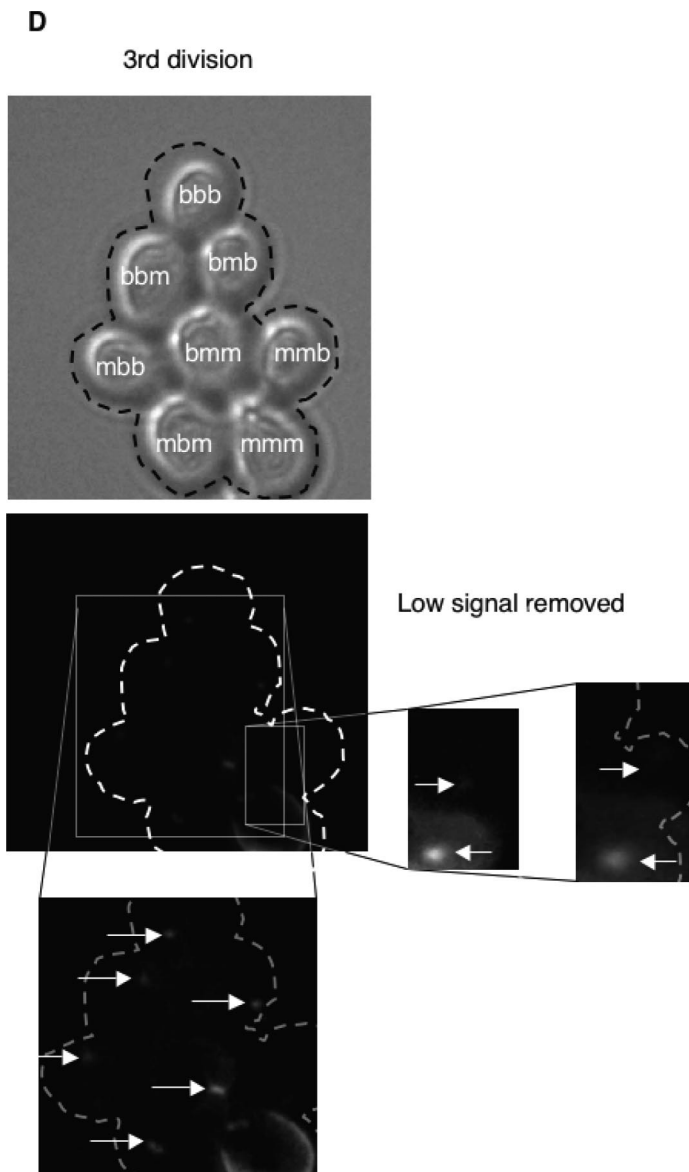

Fig. S2D.

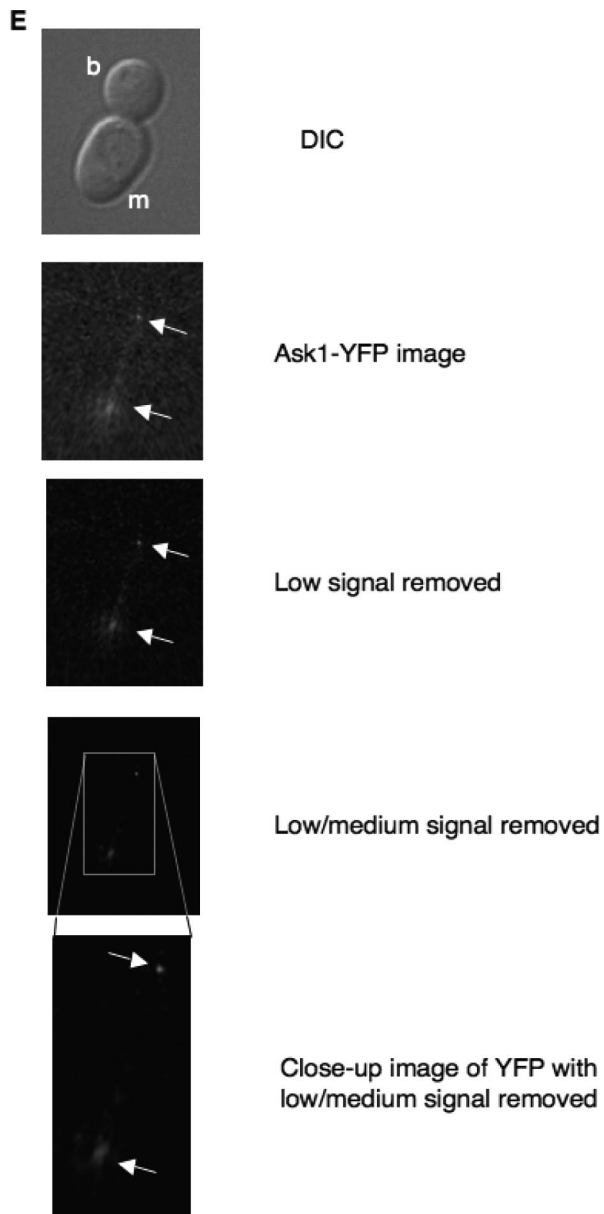

Fig. S2E.

F

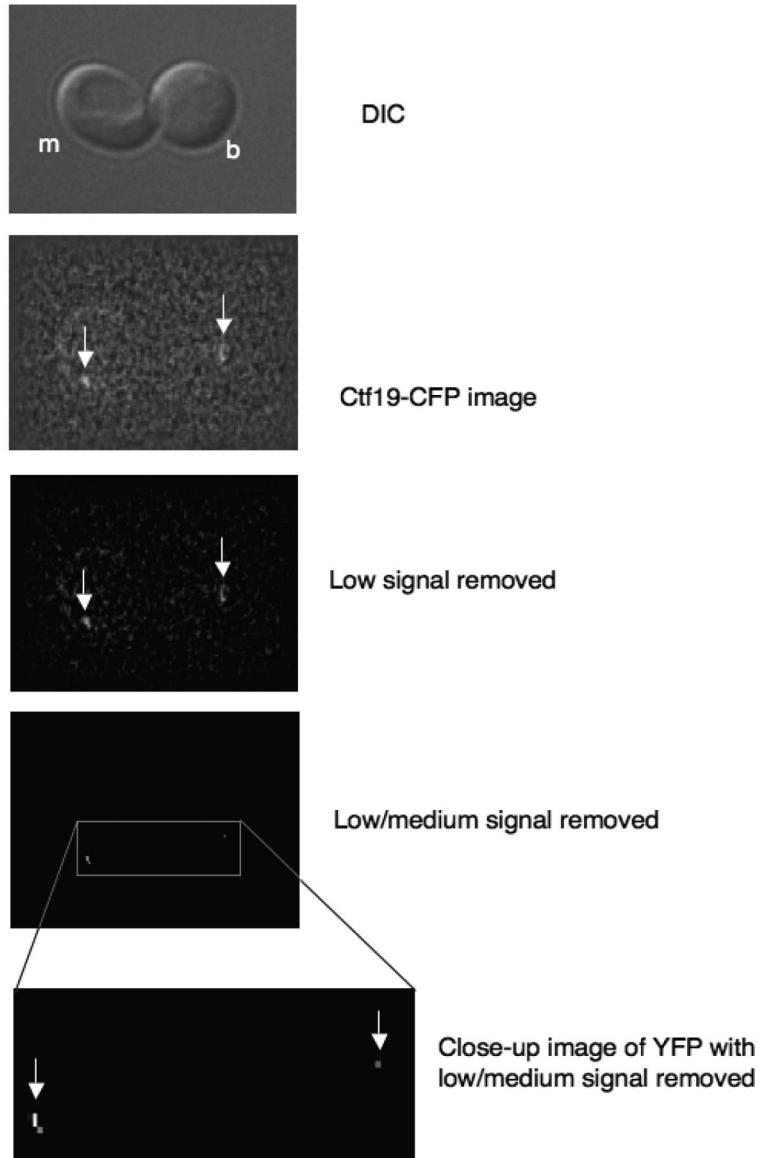

Fig. S2F.



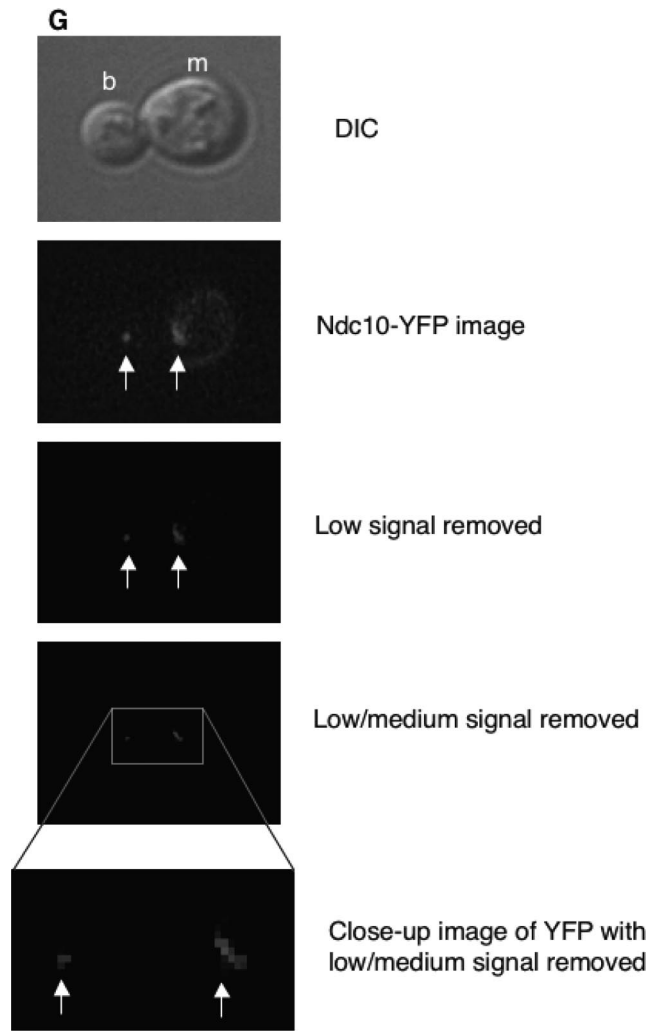

Fig. S2G.

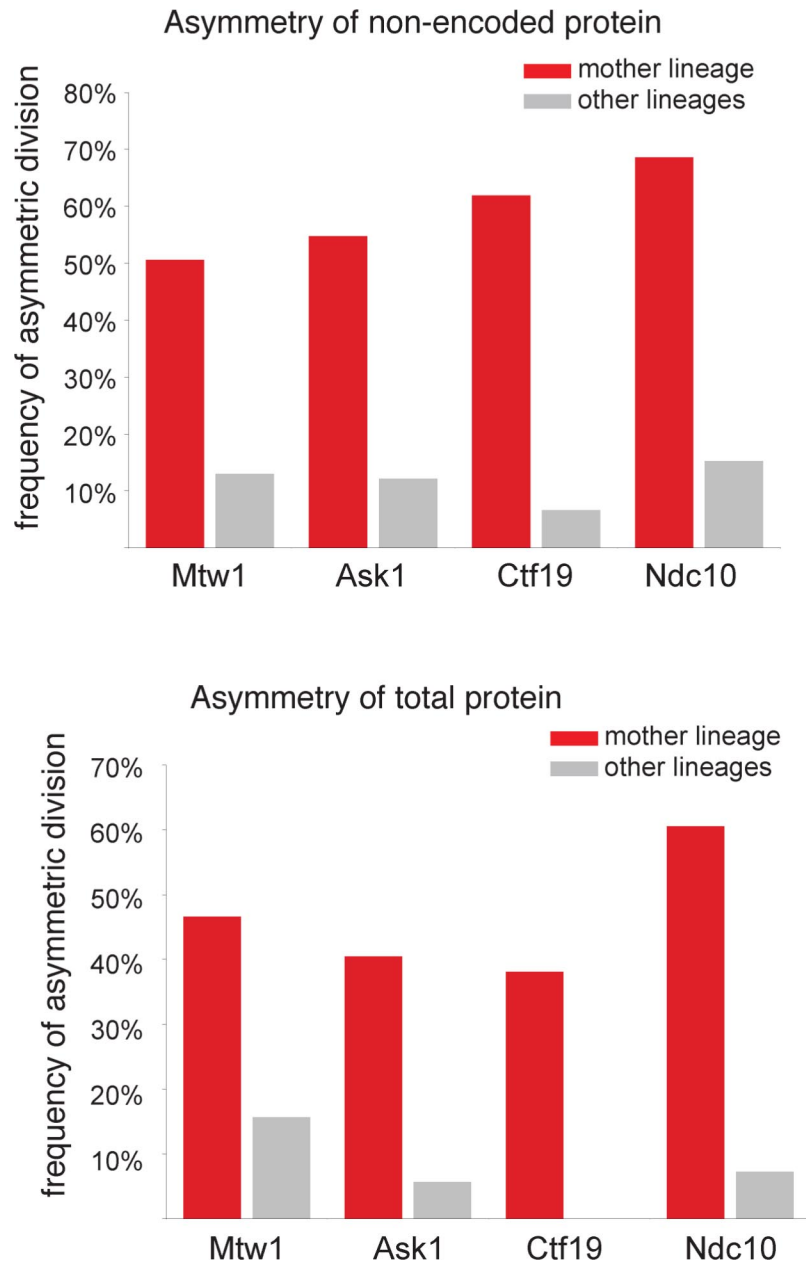

**Fig. S3.** The frequency of asymmetric divisions in both the mother lineage and the non-mother lineages for Mtw1, Ask1, Ctf19 and Ndc10. The bar graph indicates the % of divisions that are asymmetric, as defined by a mother to bud ratio of 1.6 or greater. The proportions of asymmetric divisions in the mother lineage are shaded red and the proportions in the other lineages are shaded gray. (*Upper chart*) Only the nonencoded protein is used to calculate the asymmetry frequencies. The frequencies of asymmetry in the mother lineage were compared with the non-mother lineages using Fischer's exact test (95% confidence). The resulting *P* values for Mtw1, Ask1, Ctf19 and Ndc10 are  $1.2 \times 10^{-5}$ ,  $1.1 \times 10^{-4}$ ,  $8.3 \times 10^{-4}$  and  $1 \times 10^{-6}$  respectively indicating that the frequency of asymmetry is significantly higher in the mother lineage than the non-mother lineages for each of these proteins. (*Lower chart*) The total kinetochore protein (encoded plus nonencoded) was used to calculate the asymmetry frequencies. The Fischer's exact test *p* values for Mtw1, Ask1, Ctf19 and Ndc10 are  $1.6 \times 10^{-4}$ ,  $3.2 \times 10^{-4}$ ,  $5.8 \times 10^{-6}$ , and  $2.8 \times 10^{-8}$ , respectively, again indicating that the frequency of asymmetry is significantly higher in the mother lineage compared to the other lineages.



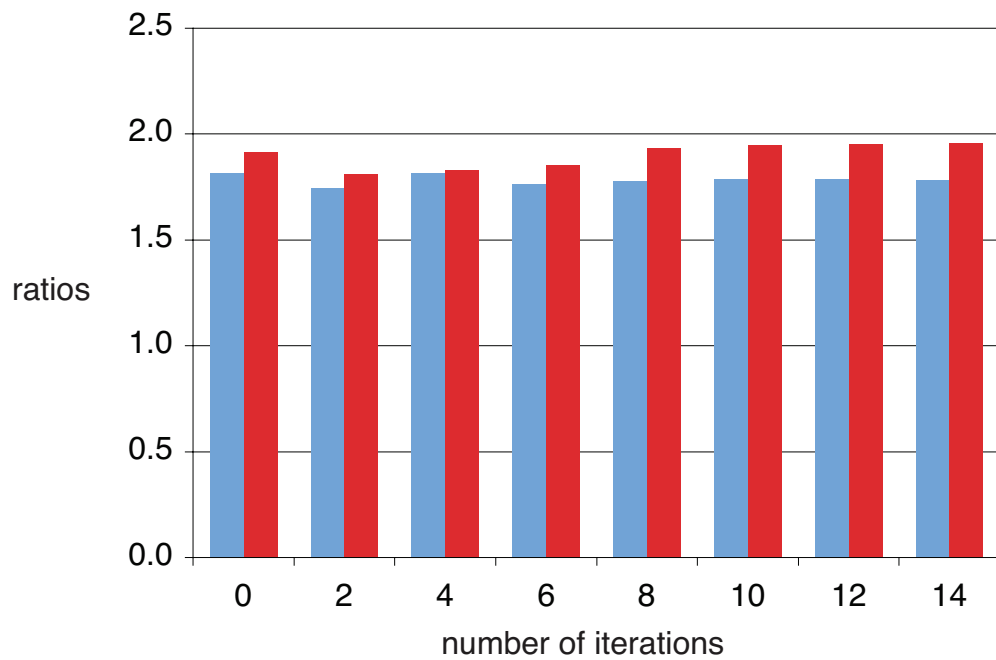

**Fig. S5.** Two examples of the effect of deconvolution on the ratio of intensity of 2 fluorescent foci. The chart shows the ratio of fluorescence between 2 foci, for 2 different samples (blue and red). The ratio of intensity is not dramatically altered by deconvolution. Zero iterations represents the image before deconvolution. All of our fluorescent images for quantitation were deconvolved for 5–9 iterations.

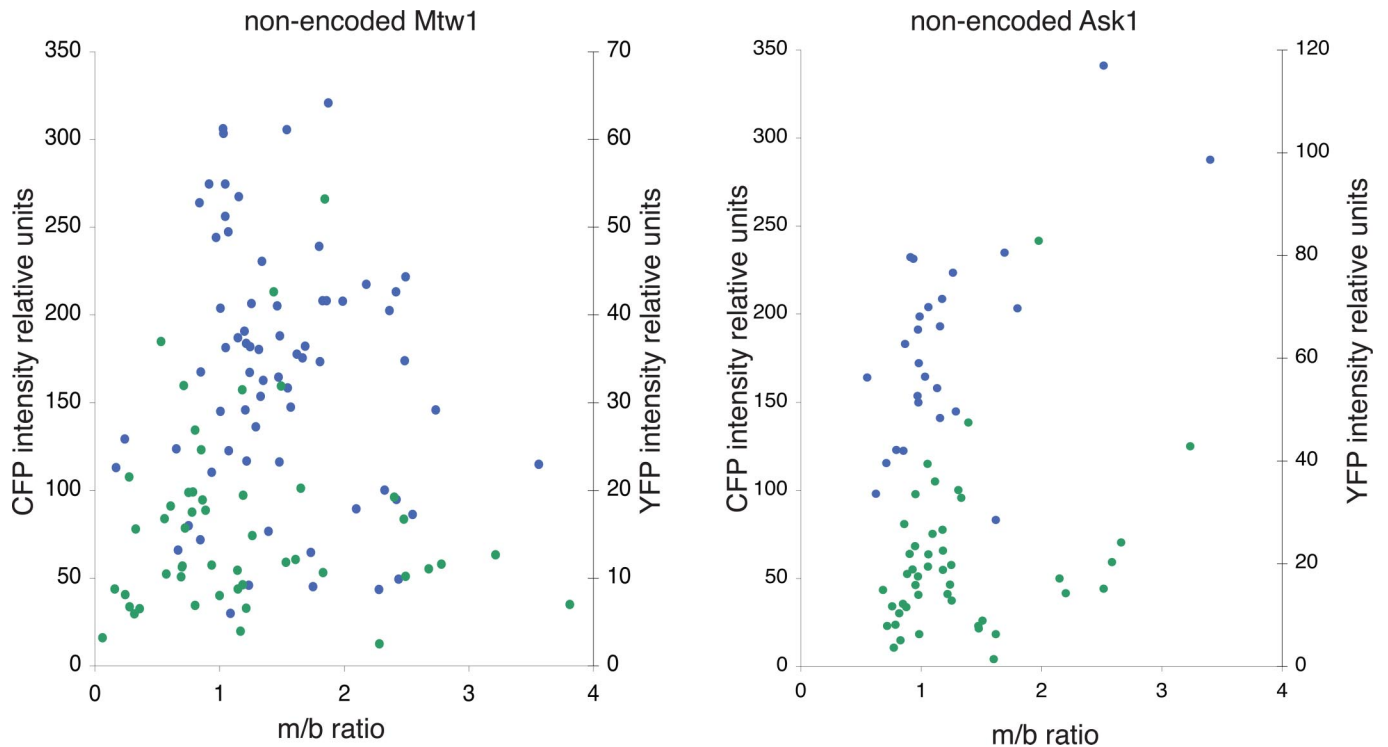

**Fig. S6.** Examples of the m/b ratios for different kinetochore divisions are plotted against fluorescence intensity. If the asymmetry that we observe is due to cellular background in the mother cell, then those kinetochores with the lowest intensity would show the highest m/b ratios and visa versa. No such correlation is found for 2 examples that we studied, Mtw1 and Ask1. The blue points indicate the ratios calculated using CFP and the green points indicate the ratios calculated using YFP. The CFP intensity is plotted on the left y axis and the YFP intensity is plotted on the right y axis. It is important to note that although only CFP shows autofluorescence of the spore wall, both YFP and CFP show a similar distribution indicating that background autofluorescence does not influence the m/b ratio.

**Table S1. Summary statistics**

| Strain–lineage                                 | Mean m/b ratio | Number of divisions, <i>n</i> | SD   | SEM  | <i>t</i> test, 2-tailed, unequal variance |
|------------------------------------------------|----------------|-------------------------------|------|------|-------------------------------------------|
| <b>Nonencoded protein</b>                      |                |                               |      |      |                                           |
| Mtw1 spores–mother lineage                     | 2.23           | 85                            | 1.98 | 0.22 | $2.2 \times 10^{-6}$                      |
| Mtw1 spores–other lineages                     | 1.10           | 46                            | 0.45 | 0.07 |                                           |
| Ask1 spores–mother lineage                     | 2.21           | 42                            | 2.09 | 0.32 | $2.0 \times 10^{-3}$                      |
| Ask1 spores–other lineages                     | 1.09           | 33                            | 0.71 | 0.12 |                                           |
| Ndc10 spores–mother lineage                    | 2.58           | 35                            | 1.82 | 0.31 | $1.8 \times 10^{-4}$                      |
| Ndc10 spores–other lineages                    | 1.25           | 46                            | 0.70 | 0.10 |                                           |
| Ctf19 spores–mother lineage                    | 2.94           | 21                            | 2.77 | 0.60 | $5.3 \times 10^{-3}$                      |
| Ctf19 spores–other lineages                    | 1.05           | 15                            | 0.38 | 0.10 |                                           |
| Hta1 spores–mother lineage                     | 0.90           | 12                            | 0.18 | 0.05 | 0.73                                      |
| Hta1 spores–other lineages                     | 0.88           | 16                            | 0.15 | 0.04 |                                           |
| <b>Total protein (nonencoded plus encoded)</b> |                |                               |      |      |                                           |
| Mtw1 haploid–all cells                         | 1.20           | 94                            | 0.69 | 0.07 |                                           |
| Mtw1 diploid–all cells                         | 1.18           | 169                           | 0.56 | 0.04 |                                           |
| Mtw1 spores–mother lineage                     | 1.88           | 88                            | 1.20 | 0.13 | $8.8 \times 10^{-6}$                      |
| Mtw1 spores–other lineages                     | 1.22           | 51                            | 0.41 | 0.06 |                                           |
| Ask1 haploid–all cells                         | 1.00           | 101                           | 0.36 | 0.04 |                                           |
| Ask1 diploid–all cells                         | 1.05           | 73                            | 0.60 | 0.07 |                                           |
| Ask1 spores–mother lineage                     | 1.75           | 42                            | 1.20 | 0.19 | $3.6 \times 10^{-6}$                      |
| Ask1 spores–other lineages                     | 1.02           | 35                            | 0.25 | 0.04 |                                           |
| Ndc10 haploid–all cells                        | 1.08           | 131                           | 0.42 | 0.04 |                                           |
| Ndc10 diploid–all cells                        | 1.16           | 26                            | 0.37 | 0.07 |                                           |
| Ndc10 spores–mother lineage                    | 1.92           | 38                            | 1.04 | 0.17 | $1.8 \times 10^{-4}$                      |
| Ndc10 spores–other lineages                    | 1.19           | 55                            | 0.46 | 0.06 |                                           |
| Ctf19 haploid–all cells                        | 0.92           | 73                            | 0.28 | 0.03 |                                           |
| Ctf19 diploid–all cells                        | 1.03           | 13                            | 0.24 | 0.07 |                                           |
| Ctf19 spores–mother lineage                    | 2.48           | 21                            | 1.64 | 0.36 | $9.7 \times 10^{-4}$                      |
| Ctf19 spores–other lineages                    | 1.09           | 16                            | 0.19 | 0.05 |                                           |
| Hta1 spores–mother lineage                     | 0.87           | 12                            | 0.14 | 0.04 | 0.98                                      |
| Hta1 spores–other lineages                     | 0.87           | 16                            | 0.12 | 0.03 |                                           |

Table S1 shows the mean m/b ratios for each of the alleles studied either in the mother lineage or other lineages (as illustrated in Figs. 1 and 2). The number of divisions studied (*n*), the standard deviation and standard error of the mean are included. A two tailed *t* test, with unequal variance, comparing the m/b ratios in the mother lineage with those of the other lineages are also shown. The upper part of the table is restricted to the nonencoded protein (i.e. the protein that was inherited from the diploid parent). The lower part of the table includes the data for total protein and consequently includes the data using both haploid and diploid cells. We use an alpha value of 0.05 as a threshold for statistical significance.

**Table S2. Strains used in this study**

| Strain    | Genotype                                                                                          |
|-----------|---------------------------------------------------------------------------------------------------|
| W7247     | <i>MATa/MAT<math>\alpha</math> MTW1-YFP/MTW1-CFP [TetR-mRFP(iYGL119W) iYCL063W224xtetO::URA3]</i> |
| W7216-5C  | <i>MAT<math>\alpha</math> MTW1-YFP TetR-mRFP(iYGL119W) iYCL063W224xtetO::URA3</i>                 |
| W7181-20D | <i>MATa MTW1-CFP TetR-mRFP(iYGL119W) iYCL063W224xtetO::URA3</i>                                   |
| W7912     | <i>MATa MAT<math>\alpha</math> HTA1-YFP HTA1-CFP</i>                                              |
| W7908     | <i>MATa/MAT<math>\alpha</math> ASK1-YFP/ASK1-CFP</i>                                              |
| J1501     | <i>MATa ASK1-YFP</i>                                                                              |
| J1502     | <i>MAT<math>\alpha</math> ASK1-CFP</i>                                                            |
| W7910     | <i>MATa/MAT<math>\alpha</math> NDC10-YFP::HIS3/NDC10-CFP::KAN [BAR1]</i>                          |
| W7871-2A  | <i>MATa NDC10-YFP::HIS3 BAR1</i>                                                                  |
| W7872-1D  | <i>MAT<math>\alpha</math> NDC10-CFP::KAN BAR1</i>                                                 |
| W7909     | <i>MATa/MAT<math>\alpha</math> CTF19-YFP::HIS3/CTF19-CFP::KAN</i>                                 |
| W7873-3D  | <i>MATa CTF19-YFP-HIS3</i>                                                                        |
| W7874-4D  | <i>MAT<math>\alpha</math> CTF19-CFP-KAN</i>                                                       |
| W8368     | <i>MATa/MAT<math>\alpha</math> [TetR-mRFP(iYGL119W) iYCL063W224xtetO::URA3]</i>                   |

All strains used in this study are *ADE2<sup>+</sup> RAD5<sup>+</sup>* derivatives of W303, *can1-100 his3-11,15 leu2-3,112 ura3-1 (1,2)* Genotypes enclosed in parenthesis square brackets indicate a homozygous diploid. In addition to the genotypes listed above all strains are *bar1::LEU2* unless otherwise indicated. Strains containing *MTW1-CFP/MTW1-YFP* and *ASK1-CFP/ASK1-YFP* were based upon 3' gene-fusion alleles provided by Rebecca Burgess (Columbia University, New York), those containing *HTA1-CFP/HTA1-YFP* were based upon 3' gene-fusion alleles provided by J. Barlow (Columbia University, New York). Strains containing the tet-operator sequences and tet-repressor tagged with red fluorescent protein are based upon those made by Michael Lisby (University of Copenhagen, Copenhagen) (3), which were derived from strains provided by Kim Nasmyth (University of Oxford, Oxford). Strains containing *CTF19-CFP/CTF19-YFP* and *NDC10-CFP/NDC10-YFP* are derived from 3' gene-fusion alleles provided by Phil Heiter (University of British Columbia, Vancouver).

## Other Supporting Information Files

[Dataset S1](#)
