# Supplementary material
Source: PubMed Central journal article supplement (PMC2672522)
Supplement: 0811248106_SD1_PDF.pdf [file 0811248106_SD1_PDF.pdf]

## Key to the Quantitative Data

Each data set is arranged in sequence of division, typically starting with an initial cell, labelled "0". The two progeny of this cell are termed "m" for mother and "b" for bud.

At the next division the original "m" or "b" is used as a prefix, hence "mm" designates the mother cell derived from the first mother. This nomenclature can be continued indefinitely, for example "mmmm" indicates a mother cell that has budded four times.

The lineages are indicated in Figs. 1 & 2 and also here.

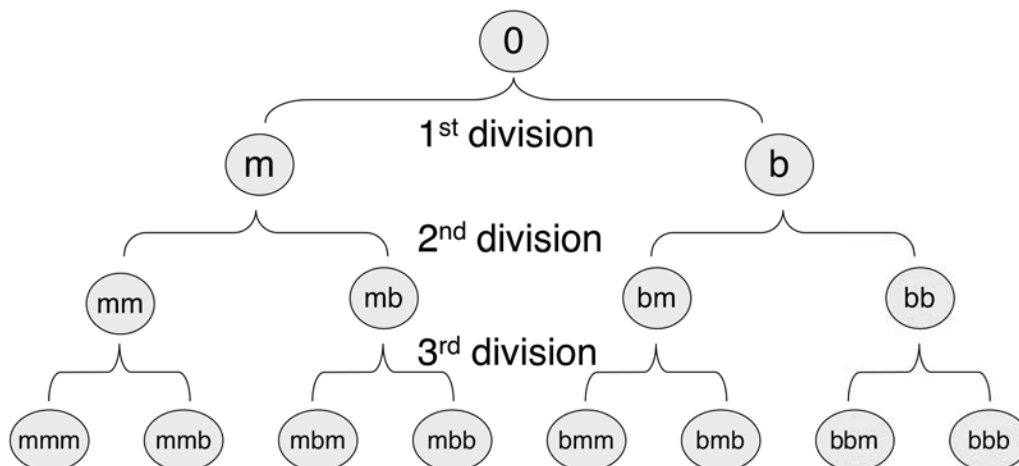

The data for a single time lapse sequence are arrayed in the following format:

| experiment identifier | cell nomenclature | fluorescent genotype | CFP value         | YFP value         |
|-----------------------|-------------------|----------------------|-------------------|-------------------|
| AG                    | 0                 | YFP                  | #numerical value# | #numerical value# |
| AG                    | m                 | YFP                  | #numerical value# | #numerical value# |
| AG                    | b                 | YFP                  | #numerical value# | #numerical value# |
| AG                    | mm                | YFP                  | #numerical value# | #numerical value# |
| AG                    | mb                | YFP                  | #numerical value# | #numerical value# |
| AG                    | bm                | YFP                  | #numerical value# | #numerical value# |
| AG                    | bb                | YFP                  | #numerical value# | #numerical value# |

In this timelapse sequence an initial cell "0" divided to give both a mother "m" and bud "b" and both of these divided again to give rise to four progeny. In this example the cell contains a gene tagged with YFP, as opposed to CFP, indicated in the third column. Note that for a haploid culture (either YFP- or CFP-tagged) only the fluorescent data for the appropriate tag are shown, since there is only one tagged protein in these cells. Each worksheet of this file indicates a different gene being studied and/or different genetic background or ploidy. The numerical values for both CFP and YFP are measured in relative units from the Volocity software package.

*MTW1*-tagged protein segregation in haploid cells:

These data are produced from two haploid strains, W7216-5C (*MTW1-YFP*) and W7181-20D (*MTW1-CFP*).

| experiment identifier | cell nomenclature | fluorescent genotype | CFP value | YFP value |
|-----------------------|-------------------|----------------------|-----------|-----------|
| A2-1                  | 0                 | YFP                  | -         | 16.631    |
| A2-1                  | m                 | YFP                  | -         | 18.188    |
| A2-1                  | b                 | YFP                  | -         | 16.661    |
| A2-1                  | mm                | YFP                  | -         | 10.904    |
| A2-1                  | mb                | YFP                  | -         | 7.355     |
| A2-1                  | bm                | YFP                  | -         | 12.344    |
| A2-1                  | bb                | YFP                  | -         | 10.984    |
| A2-1                  | mmm               | YFP                  | -         | 7.393     |
| A2-1                  | mmb               | YFP                  | -         | 7.589     |
| A2-2                  | 0                 | YFP                  | -         | 24.718    |
| A2-2                  | m                 | YFP                  | -         | 19.494    |
| A2-2                  | b                 | YFP                  | -         | 15.955    |
| A2-2                  | mm                | YFP                  | -         | 12.894    |
| A2-2                  | mb                | YFP                  | -         | 9.657     |
| A2-2                  | bm                | YFP                  | -         | 10.276    |
| A2-2                  | bb                | YFP                  | -         | 12.856    |
| A2-2                  | bmm               | YFP                  | -         | 9.54      |
| A2-2                  | bmb               | YFP                  | -         | 7.35      |
| A2-2                  | bbm               | YFP                  | -         | 8.321     |
| A2-2                  | bbb               | YFP                  | -         | 7.533     |
| A3                    | m                 | YFP                  | -         | 13.864    |
| A3                    | b                 | YFP                  | -         | 16.78     |
| A3                    | mm                | YFP                  | -         | 15.797    |
| A3                    | mb                | YFP                  | -         | 9.831     |
| A3                    | bm                | YFP                  | -         | 14.431    |
| A3                    | bb                | YFP                  | -         | 16.48     |
| A4-1                  | 0                 | YFP                  | -         | 30.171    |
| A4-1                  | m                 | YFP                  | -         | 21.702    |
| A4-1                  | b                 | YFP                  | -         | 20.804    |
| A4-1                  | mm                | YFP                  | -         | 15.588    |
| A4-1                  | mb                | YFP                  | -         | 12.962    |

|      |     |     |   |        |
|------|-----|-----|---|--------|
| A4-1 | bm  | YFP | - | 12.166 |
| A4-1 | bb  | YFP | - | 10.391 |
| A4-2 | 0   | YFP | - | 21.165 |
| A4-2 | m   | YFP | - | 21.882 |
| A4-2 | b   | YFP | - | 13.847 |
| A4-2 | mm  | YFP | - | 8.208  |
| A4-2 | mb  | YFP | - | 8.223  |
| A4-2 | bm  | YFP | - | 9.849  |
| A4-2 | bb  | YFP | - | 11.11  |
| B1-1 | 0   | YFP | - | 31.128 |
| B1-1 | mmm | YFP | - | 16.231 |
| B1-1 | mmb | YFP | - | 7.029  |
| B1-2 | 0   | YFP | - | 31.779 |
| B1-2 | m   | YFP | - | 22.825 |
| B1-2 | b   | YFP | - | 48.504 |
| B1-2 | bm  | YFP | - | 23.164 |
| B1-2 | bb  | YFP | - | 16.177 |
| B2-1 | 0   | YFP | - | 22.286 |
| B2-1 | m   | YFP | - | 7.062  |
| B2-1 | b   | YFP | - | 6.825  |
| B2-2 | 0   | YFP | - | 9.803  |
| B2-2 | m   | YFP | - | 7.73   |
| B2-2 | b   | YFP | - | 11.19  |
| B4   | m   | YFP | - | 30.386 |
| B4   | b   | YFP | - | 39.947 |
| B4   | mm  | YFP | - | 23.885 |
| B4   | mb  | YFP | - | 45.066 |
| B4   | bm  | YFP | - | 55.728 |
| B4   | bb  | YFP | - | 46.821 |
| B4   | mmm | YFP | - | 16.015 |
| B4   | mmb | YFP | - | 25.46  |
| B4   | mbm | YFP | - | 35.784 |
| B4   | mhb | YFP | - | 27.129 |
| B4   | bmm | YFP | - | 47.147 |
| B4   | bmb | YFP | - | 37.064 |

|       |      |     |   |        |
|-------|------|-----|---|--------|
| B4    | bbm  | YFP | - | 41.76  |
| B4    | bbb  | YFP | - | 26.55  |
| B4    | bmmm | YFP | - | 18.794 |
| B4    | bmbb | YFP | - | 18.134 |
| B4    | bmbm | YFP | - | 31.334 |
| B4    | bmbb | YFP | - | 27.89  |
| <hr/> |      |     |   |        |
| B5    | m    | YFP | - | 29.195 |
| B5    | b    | YFP | - | 40.256 |
| B5    | mm   | YFP | - | 19.877 |
| B5    | mb   | YFP | - | 68.166 |
| B5    | bm   | YFP | - | 41.067 |
| B5    | bb   | YFP | - | 50.925 |
| B5    | mmm  | YFP | - | 6.283  |
| B5    | mmb  | YFP | - | 14.533 |
| B5    | mbm  | YFP | - | 14.897 |
| B5    | mbb  | YFP | - | 3.736  |
| B5    | bmm  | YFP | - | 31.762 |
| B5    | bmb  | YFP | - | 40.744 |
| B5    | bbm  | YFP | - | 28.659 |
| B5    | bbb  | YFP | - | 43.841 |
| <hr/> |      |     |   |        |
| B6    | m    | YFP | - | 33.366 |
| B6    | b    | YFP | - | 48.433 |
| B6    | mm   | YFP | - | 42.17  |
| B6    | mb   | YFP | - | 26.847 |
| B6    | bm   | YFP | - | 7.498  |
| B6    | bb   | YFP | - | 18.269 |
| B6    | mmm  | YFP | - | 17.121 |
| B6    | mmb  | YFP | - | 18.869 |
| B6    | mbm  | YFP | - | 23.124 |
| B6    | mbb  | YFP | - | 24.897 |
| B6    | bmm  | YFP | - | 26.466 |
| B6    | bmb  | YFP | - | 7.21   |
| B6    | bbm  | YFP | - | 25.837 |
| B6    | bbb  | YFP | - | 26.405 |
| <hr/> |      |     |   |        |
| B8    | m    | YFP | - | 25.437 |

|       |     |     |   |        |
|-------|-----|-----|---|--------|
| B8    | b   | YFP | - | 31.503 |
| B8    | mm  | YFP | - | 24.208 |
| B8    | mb  | YFP | - | 31.595 |
| B8    | bm  | YFP | - | 20.028 |
| B8    | bb  | YFP | - | 36.281 |
| B8    | mmm | YFP | - | 27.469 |
| B8    | mmb | YFP | - | 14.316 |
| B8    | mbm | YFP | - | 11.937 |
| B8    | mbb | YFP | - | 18.406 |
| B8    | bmm | YFP | - | 10.218 |
| B8    | bmb | YFP | - | 17.447 |
| B8    | bbm | YFP | - | 24.586 |
| B8    | bbb | YFP | - | 38.297 |
| B9-1  | m   | YFP | - | 33.545 |
| B9-1  | b   | YFP | - | 34.311 |
| B9-1  | bm  | YFP | - | 25     |
| B9-1  | bb  | YFP | - | 20.441 |
| B9-2  | m   | YFP | - | 37.306 |
| B9-2  | b   | YFP | - | 14.127 |
| B9-2  | mm  | YFP | - | 40.081 |
| B9-2  | mb  | YFP | - | 17.051 |
| B9-2  | mb  | YFP | - | 19.942 |
| B9-2  | bb  | YFP | - | 17.141 |
| 06-A2 | m   | YFP | - | 37.88  |
| 06-A2 | b   | YFP | - | 51.361 |
| 06-A2 | mm  | YFP | - | 14.87  |
| 06-A2 | mb  | YFP | - | 14.028 |
| 06-A2 | bm  | YFP | - | 9.097  |
| 06-A2 | bb  | YFP | - | 14.812 |
| 06-A3 | m   | YFP | - | 75.332 |
| 06-A3 | b   | YFP | - | 37.416 |
| 06-A3 | mm  | YFP | - | 13.226 |
| 06-A3 | mb  | YFP | - | 6.283  |
| 06-A3 | bm  | YFP | - | 6.33   |
| 06-A3 | bb  | YFP | - | 10.624 |

|         |    |     |         |        |
|---------|----|-----|---------|--------|
| 06-A4A  | m  | YFP | -       | 26.083 |
| 06-A4A  | b  | YFP | -       | 6.511  |
| 06-A4B  | m  | YFP | -       | 30.958 |
| 06-A4B  | b  | YFP | -       | 15.627 |
| 06-A6   | m  | YFP | -       | 10.739 |
| 06-A6   | b  | YFP | -       | 10.839 |
| 06-A8-1 | m  | YFP | -       | 55.281 |
| 06-A8-1 | b  | YFP | -       | 33.415 |
| 06-A8-2 | m  | YFP | -       | 29.931 |
| 06-A8-2 | b  | YFP | -       | 37.941 |
| 06-C2-1 | m  | YFP | -       | 57.724 |
| 06-C2-1 | b  | YFP | -       | 75.162 |
| 06-C2-2 | m  | YFP | -       | 40.712 |
| 06-C2-2 | b  | YFP | -       | 54.635 |
| 06-C5   | 0  | YFP | -       | 51.58  |
| 06-C5   | m  | YFP | -       | 79.208 |
| 06-C5   | b  | YFP | -       | 78.208 |
| 06-C5   | mm | YFP | -       | 45.926 |
| 06-C5   | mb | YFP | -       | 41.368 |
| 06-C5   | bm | YFP | -       | 62.305 |
| 06-C5   | bb | YFP | -       | 43.929 |
| 06-B1-1 | 0  | CFP | 88.109  | -      |
| 06-B1-1 | m  | CFP | 65.242  | -      |
| 06-B1-1 | b  | CFP | 72.796  | -      |
| 06-B1-2 | 0  | CFP | 111.553 | -      |
| 06-B1-2 | m  | CFP | 72.479  | -      |
| 06-B1-2 | b  | CFP | 83.71   | -      |
| 06-B2   | 0  | CFP | 167.623 | -      |
| 06-B2   | m  | CFP | 52.678  | -      |
| 06-B2   | b  | CFP | 88.83   | -      |
| 06-B3   | 0  | CFP | 82.106  | -      |
| 06-B3   | m  | CFP | 77.862  | -      |
| 06-B3   | b  | CFP | 62.383  | -      |
| 06-B4   | 0  | CFP | 68.11   | -      |
| 06-B4   | m  | CFP | 74.151  | -      |

|         |    |     |         |   |
|---------|----|-----|---------|---|
| 06-B4   | b  | CFP | 63.771  | - |
| 06-B5   | 0  | CFP | 71.223  | - |
| 06-B5   | m  | CFP | 62.379  | - |
| 06-B5   | b  | CFP | 93.05   | - |
| 06-B5   | mm | CFP | 54.877  | - |
| 06-B5   | mb | CFP | 34.635  | - |
| 06-B5   | bm | CFP | 32.213  | - |
| 06-B5   | bb | CFP | 32.888  | - |
| 06-B6   | 0  | CFP | 88.713  | - |
| 06-B6   | m  | CFP | 75.811  | - |
| 06-B6   | b  | CFP | 72.855  | - |
| 06-B6   | mm | CFP | 19.251  | - |
| 06-B6   | mb | CFP | 21.636  | - |
| 06-B7-1 | 0  | CFP | 118.317 | - |
| 06-B7-1 | m  | CFP | 81.361  | - |
| 06-B7-1 | b  | CFP | 70.087  | - |
| 06-B7-2 | 0  | CFP | 114.019 | - |
| 06-B7-2 | m  | CFP | 66.133  | - |
| 06-B7-2 | b  | CFP | 64.339  | - |
| 06-B7-2 | mm | CFP | 63.401  | - |
| 06-B7-2 | mb | CFP | 39.255  | - |
| 06-B7-3 | 0  | CFP | 72.816  | - |
| 06-B7-3 | m  | CFP | 113.874 | - |
| 06-B7-3 | b  | CFP | 55.945  | - |
| 06-B7-3 | mm | CFP | 51.424  | - |
| 06-B7-3 | mb | CFP | 18.639  | - |
| 06-B8   | 0  | CFP | 100.91  | - |
| 06-B8   | m  | CFP | 73.697  | - |
| 06-B8   | b  | CFP | 85.83   | - |
| 06-B8   | mm | CFP | 63.329  | - |
| 06-B8   | mb | CFP | 62.159  | - |
| 06-B9   | 0  | CFP | 97.975  | - |
| 06-B9   | m  | CFP | 72.981  | - |
| 06-B9   | b  | CFP | 76.745  | - |
| 06-B9   | mm | CFP | 75.785  | - |

|       |     |     |        |   |
|-------|-----|-----|--------|---|
| 06-B9 | mb  | CFP | 63.683 | - |
| 06-B9 | bm  | CFP | 65.464 | - |
| 06-B9 | bb  | CFP | 63.843 | - |
| 06-B9 | mmm | CFP | 59.455 | - |
| 06-B9 | mmb | CFP | 40.464 | - |



*MTW1*-tagged protein segregation diploid cells:

These data are produced from a diploid strain (W7247) containing both *MTW1-YFP* and *MTW1-CFP*.

| experiment identifier | cell nomenclature | fluorescent genotype | CFP value | YFP value |
|-----------------------|-------------------|----------------------|-----------|-----------|
| A1                    | m                 | CFP & YFP            | 221.095   | 109.431   |
| A1                    | b                 | CFP & YFP            | 265.517   | 102.556   |
| A1                    | mm                | CFP & YFP            | 158.022   | 75.555    |
| A1                    | mb                | CFP & YFP            | 150.058   | 48.183    |
| A1                    | bm                | CFP & YFP            | 158.603   | 19.432    |
| A1                    | bb                | CFP & YFP            | 154.511   | 43.104    |
| A1                    | mmm               | CFP & YFP            | 203.11    | 79.482    |
| A1                    | mmb               | CFP & YFP            | 135.774   | 23.172    |
| A1                    | mbm               | CFP & YFP            | 84.897    | 10.718    |
| A1                    | mbb               | CFP & YFP            | 47.464    | 15.524    |
| A2                    | 0                 | CFP & YFP            | 140.372   | 129.939   |
| A2                    | m                 | CFP & YFP            | 222.325   | 123.482   |
| A2                    | b                 | CFP & YFP            | 223.81    | 129.631   |
| A2                    | mm                | CFP & YFP            | 257.907   | 86.674    |
| A2                    | mb                | CFP & YFP            | 198.079   | 43.372    |
| A2                    | bm                | CFP & YFP            | 149.052   | 18.336    |
| A2                    | bb                | CFP & YFP            | 224.033   | 176.599   |
| A2                    | mmm               | CFP & YFP            | 153.254   | 82.587    |
| A2                    | mmb               | CFP & YFP            | 128.431   | 59.949    |
| A2                    | mbm               | CFP & YFP            | 104.085   | 52.664    |
| A2                    | mbb               | CFP & YFP            | 110.448   | 69.463    |
| A3                    | 0                 | CFP & YFP            | 133.615   | 94.148    |
| A3                    | m                 | CFP & YFP            | 181.208   | 68.616    |
| A3                    | b                 | CFP & YFP            | 151.69    | 52.907    |
| A3                    | mm                | CFP & YFP            | 230.42    | 75.618    |
| A3                    | mb                | CFP & YFP            | 204.998   | 56.709    |
| A3                    | bm                | CFP & YFP            | 196.702   | 42.911    |
| A3                    | bb                | CFP & YFP            | 81.99     | 17.522    |
| A3                    | mmm               | CFP & YFP            | 98.668    | 0.979     |
| A3                    | mmb               | CFP & YFP            | 105.357   | 3.418     |
| A4                    | 0                 | CFP & YFP            | 137.235   | 97.895    |

|       |     |           |         |         |
|-------|-----|-----------|---------|---------|
| A4    | m   | CFP & YFP | 235.536 | 105.328 |
| A4    | b   | CFP & YFP | 144.018 | 54.62   |
| A4    | mm  | CFP & YFP | 145.951 | 43.604  |
| A4    | mb  | CFP & YFP | 201.181 | 57.674  |
| A4    | bm  | CFP & YFP | 119.834 | 57.127  |
| A4    | bb  | CFP & YFP | 123.08  | 45.101  |
| A4    | mmm | CFP & YFP | 52.668  | 13.971  |
| A4    | mmb | CFP & YFP | 121.325 | 46.499  |
| A4    | bmm | CFP & YFP | 71.002  | 8.993   |
| A4    | bmb | CFP & YFP | 27.027  | 17.206  |
| A4    | mbm | CFP & YFP | 72.849  | 4.86    |
| A4    | mbb | CFP & YFP | 64.238  | 4.981   |
| <hr/> |     |           |         |         |
| A5    | 0   | CFP & YFP | 172.047 | 132.65  |
| A5    | m   | CFP & YFP | 211.716 | 108.184 |
| A5    | b   | CFP & YFP | 174.343 | 142.55  |
| A5    | mm  | CFP & YFP | 143.707 | 57.941  |
| A5    | mb  | CFP & YFP | 101.926 | 46.876  |
| A5    | bm  | CFP & YFP | 151.768 | 35.82   |
| A5    | bb  | CFP & YFP | 168.198 | 75.549  |
| A5    | mmm | CFP & YFP | 131.371 | 7.663   |
| A5    | mmb | CFP & YFP | 102.02  | 13.754  |
| A5    | bmm | CFP & YFP | 151.958 | 41.075  |
| A5    | bmb | CFP & YFP | 133.665 | 24.093  |
| A5    | mbm | CFP & YFP | 96.841  | 29.506  |
| A5    | mbb | CFP & YFP | 35.748  | 2.442   |
| <hr/> |     |           |         |         |
| A6    | 0   | CFP & YFP | 151.771 | 101.755 |
| A6    | m   | CFP & YFP | 54.182  | 92.075  |
| A6    | b   | CFP & YFP | 69.373  | 74.559  |
| A6    | mm  | CFP & YFP | 63.863  | 39.636  |
| A6    | mb  | CFP & YFP | 171.589 | 60.608  |
| A6    | bm  | CFP & YFP | 70.77   | 23.43   |
| A6    | bb  | CFP & YFP | 155.448 | 48.145  |
| A6    | mmm | CFP & YFP | 95.664  | 24.304  |
| A6    | mmb | CFP & YFP | 117.48  | 59.485  |
| A6    | mbm | CFP & YFP | 99.953  | 24.924  |

|    |     |           |         |         |
|----|-----|-----------|---------|---------|
| A6 | mbb | CFP & YFP | 85.224  | 4.781   |
| A6 | bmm | CFP & YFP | 70.598  | 6.841   |
| A6 | bmb | CFP & YFP | 16.706  | 6.639   |
| A7 | m   | CFP & YFP | 116.758 | 103.14  |
| A7 | b   | CFP & YFP | 157.686 | 158.87  |
| A7 | mm  | CFP & YFP | 203.126 | 67.137  |
| A7 | mb  | CFP & YFP | 120.747 | 27.501  |
| A7 | bm  | CFP & YFP | 133.704 | 50.107  |
| A7 | bb  | CFP & YFP | 127.827 | 74.743  |
| A7 | mmm | CFP & YFP | 146.259 | 27.698  |
| A7 | mmb | CFP & YFP | 160.086 | 10.461  |
| A7 | mbm | CFP & YFP | 168.038 | 35.137  |
| A7 | mbb | CFP & YFP | 94.309  | 7.374   |
| A8 | 0   | CFP & YFP | 210.472 | 103.507 |
| A8 | m   | CFP & YFP | 50.31   | 42.187  |
| A8 | b   | CFP & YFP | 47.887  | 33.071  |
| A8 | mm  | CFP & YFP | 143.524 | 40      |
| A8 | mb  | CFP & YFP | 109.796 | 29.512  |
| A8 | bm  | CFP & YFP | 116.95  | 26.73   |
| A8 | bb  | CFP & YFP | 42.887  | 32.321  |
| A8 | mmm | CFP & YFP | 140.738 | 34.964  |
| A8 | mmb | CFP & YFP | 114.255 | 15.93   |
| A8 | mbm | CFP & YFP | 88.72   | 27.454  |
| A8 | mbb | CFP & YFP | 57.948  | 3.904   |
| A9 | 0   | CFP & YFP | 161.7   | 95.794  |
| A9 | m   | CFP & YFP | 154.149 | 57.353  |
| A9 | b   | CFP & YFP | 177.873 | 54.703  |
| A9 | mm  | CFP & YFP | 61.487  | 35.732  |
| A9 | mb  | CFP & YFP | 137.033 | 58.123  |
| A9 | bm  | CFP & YFP | 83.308  | 22.371  |
| A9 | bb  | CFP & YFP | 131.526 | 44.609  |
| A9 | mmm | CFP & YFP | 147.874 | 20.583  |
| A9 | mmb | CFP & YFP | 147.853 | 12.99   |
| A9 | bmm | CFP & YFP | 140.2   | 21.09   |
| A9 | bmb | CFP & YFP | 80.596  | 4.317   |

|    |     |           |         |         |
|----|-----|-----------|---------|---------|
| B1 | 0   | CFP & YFP | 43.394  | 53.373  |
| B1 | m   | CFP & YFP | 95.73   | 18.084  |
| B1 | b   | CFP & YFP | 133.368 | 91.079  |
| B1 | bm  | CFP & YFP | 80.523  | 9.332   |
| B1 | bb  | CFP & YFP | 41.628  | 6.905   |
| B2 | 0   | CFP & YFP | 322.473 | 102.801 |
| B2 | m   | CFP & YFP | 174.933 | 44.314  |
| B2 | b   | CFP & YFP | 213.827 | 37.145  |
| B2 | mm  | CFP & YFP | 138.616 | 14.217  |
| B2 | mb  | CFP & YFP | 164.911 | 16.646  |
| B2 | bm  | CFP & YFP | 165.103 | 23.537  |
| B2 | bb  | CFP & YFP | 126.901 | 23.342  |
| B2 | mmm | CFP & YFP | 121.609 | 14.933  |
| B2 | mmb | CFP & YFP | 140.254 | 13.425  |
| B3 | 0   | CFP & YFP | 257.42  | 88.49   |
| B3 | m   | CFP & YFP | 157.018 | 23.601  |
| B3 | b   | CFP & YFP | 215.213 | 68.962  |
| B3 | mm  | CFP & YFP | 111.196 | 5.593   |
| B3 | mb  | CFP & YFP | 93.615  | 4.16    |
| B3 | bm  | CFP & YFP | 79.491  | 3.044   |
| B3 | bb  | CFP & YFP | 44.479  | 1.295   |
| B3 | mmm | CFP & YFP | 116.363 | 6.543   |
| B3 | mmb | CFP & YFP | 92.493  | 4.095   |
| B3 | bmm | CFP & YFP | 90.687  | 4.037   |
| B3 | bmb | CFP & YFP | 66.814  | 2.905   |
| B3 | mbm | CFP & YFP | 110.497 | 7.515   |
| B3 | mhb | CFP & YFP | 111.523 | 7.589   |
| B4 | 0   | CFP & YFP | 91.53   | 90.706  |
| B4 | m   | CFP & YFP | 180.16  | 18.795  |
| B4 | b   | CFP & YFP | 215.806 | 19.821  |
| B4 | mm  | CFP & YFP | 68.438  | 30.909  |
| B4 | mb  | CFP & YFP | 127.732 | 50.346  |
| B4 | bm  | CFP & YFP | 57.695  | 11.603  |
| B4 | bb  | CFP & YFP | 163.001 | 67.747  |
| B4 | mmm | CFP & YFP | 88.535  | 5.143   |

|    |     |           |         |         |
|----|-----|-----------|---------|---------|
| B4 | mmb | CFP & YFP | 92.402  | 14.998  |
| B4 | mbm | CFP & YFP | 142.175 | 19.382  |
| B4 | mbb | CFP & YFP | 137.175 | 27.42   |
| B4 | bmm | CFP & YFP | 69.72   | 13.116  |
| B4 | bmb | CFP & YFP | 84.52   | 30.476  |
| B5 | 0   | CFP & YFP | 112.124 | 61.741  |
| B5 | m   | CFP & YFP | 58.387  | 51.723  |
| B5 | b   | CFP & YFP | 101.022 | 88.312  |
| B5 | mm  | CFP & YFP | 127.741 | 52.164  |
| B5 | mb  | CFP & YFP | 101.424 | 43.815  |
| B5 | bm  | CFP & YFP | 89.158  | 51.081  |
| B5 | bb  | CFP & YFP | 62.414  | 59.928  |
| B5 | mmm | CFP & YFP | 134.737 | 9.598   |
| B5 | mmb | CFP & YFP | 93.242  | 5.239   |
| B5 | mbm | CFP & YFP | 127.882 | 10.985  |
| B5 | mbb | CFP & YFP | 124.906 | 10.81   |
| B5 | bmm | CFP & YFP | 86.299  | 6.429   |
| B5 | bmb | CFP & YFP | 113.184 | 8.391   |
| B5 | bbm | CFP & YFP | 75.907  | 5.668   |
| B5 | bbb | CFP & YFP | 18.502  | 0.445   |
| B6 | 0   | CFP & YFP | 142.181 | 130.117 |
| B6 | m   | CFP & YFP | 170.106 | 138.837 |
| B6 | b   | CFP & YFP | 153.741 | 154.214 |
| B6 | mm  | CFP & YFP | 147.132 | 121.598 |
| B6 | mb  | CFP & YFP | 145.265 | 143.655 |
| B6 | bm  | CFP & YFP | 151.161 | 84.98   |
| B6 | bb  | CFP & YFP | 155.699 | 85.747  |
| B6 | mmm | CFP & YFP | 120.259 | 13.845  |
| B6 | mmb | CFP & YFP | 75.309  | 7.479   |
| B6 | mbm | CFP & YFP | 94.792  | 35.305  |
| B6 | mbb | CFP & YFP | 111.034 | 34.058  |
| B6 | bmm | CFP & YFP | 136.767 | 42.583  |
| B6 | bmb | CFP & YFP | 101.261 | 24.84   |
| B6 | bbm | CFP & YFP | 101.91  | 11.67   |
| B6 | bbb | CFP & YFP | 104.71  | 12.707  |

|    |      |           |         |        |
|----|------|-----------|---------|--------|
| B7 | m    | CFP & YFP | 183.814 | 77.227 |
| B7 | b    | CFP & YFP | 114.248 | 78.025 |
| B7 | mm   | CFP & YFP | 183.478 | 87.743 |
| B7 | mb   | CFP & YFP | 133.136 | 46.942 |
| B7 | bm   | CFP & YFP | 162.296 | 49.955 |
| B7 | bb   | CFP & YFP | 99.389  | 38.805 |
| B7 | mmm  | CFP & YFP | 150.197 | 24.535 |
| B7 | mmb  | CFP & YFP | 153.366 | 35.168 |
| B7 | mbm  | CFP & YFP | 111.898 | 21.955 |
| B7 | mbb  | CFP & YFP | 64.498  | 20.97  |
| B7 | bmm  | CFP & YFP | 161.032 | 45.922 |
| B7 | bmb  | CFP & YFP | 86.535  | 13.908 |
| B7 | bmm  | CFP & YFP | 69.778  | 6.323  |
| B7 | bbb  | CFP & YFP | 54.895  | 6.252  |
| B7 | mmmm | CFP & YFP | 154.788 | 24.658 |
| B7 | mmmb | CFP & YFP | 197.392 | 38.244 |
| B7 | mmbm | CFP & YFP | 159.434 | 10.174 |
| B7 | mmbb | CFP & YFP | 122.448 | 4.07   |
| B7 | mbmm | CFP & YFP | 93.586  | 10.694 |
| B7 | mbmb | CFP & YFP | 53.128  | 8.875  |
| B8 | 0    | CFP & YFP | 191.151 | 94.795 |
| B8 | m    | CFP & YFP | 63.45   | 68.465 |
| B8 | b    | CFP & YFP | 63.016  | 43.978 |
| B8 | mm   | CFP & YFP | 129.963 | 28.403 |
| B8 | mb   | CFP & YFP | 94.892  | 43.829 |
| B8 | bm   | CFP & YFP | 138.206 | 27.642 |
| B8 | bb   | CFP & YFP | 109.659 | 51.07  |
| B8 | mmm  | CFP & YFP | 151.53  | 40.829 |
| B8 | mmb  | CFP & YFP | 148.328 | 27.904 |
| B8 | mbm  | CFP & YFP | 2.06    | 1.068  |
| B8 | mbb  | CFP & YFP | 23.765  | 3.691  |
| B8 | bmm  | CFP & YFP | 121.739 | 7.98   |
| B8 | bmb  | CFP & YFP | 125.625 | 7.067  |
| B8 | mmmm | CFP & YFP | 89.396  | 4.919  |
| B8 | mmmb | CFP & YFP | 36.413  | 3.137  |

|    |      |           |         |         |
|----|------|-----------|---------|---------|
| B9 | m    | CFP & YFP | 33.815  | 21.95   |
| B9 | b    | CFP & YFP | 184.736 | 125.747 |
| B9 | mm   | CFP & YFP | 49.652  | 30.211  |
| B9 | mb   | CFP & YFP | 161.166 | 147.596 |
| B9 | bm   | CFP & YFP | 103.103 | 25.892  |
| B9 | bb   | CFP & YFP | 84.526  | 47.872  |
| B9 | mmm  | CFP & YFP | 68.602  | 28.387  |
| B9 | mmb  | CFP & YFP | 39.79   | 38.151  |
| B9 | mbm  | CFP & YFP | 99.606  | 41.433  |
| B9 | mbb  | CFP & YFP | 137.337 | 64.156  |
| B9 | bmm  | CFP & YFP | 160.524 | 28.582  |
| B9 | bmb  | CFP & YFP | 160.609 | 24.684  |
| B9 | bbm  | CFP & YFP | 124.982 | 28.93   |
| B9 | bbb  | CFP & YFP | 99.655  | 20.846  |
| B9 | mmmm | CFP & YFP | 100.626 | 17.32   |
| B9 | mmmb | CFP & YFP | 132.757 | 31.012  |
| B9 | mmbm | CFP & YFP | 87.243  | 3.751   |
| B9 | mmbb | CFP & YFP | 79.459  | 12.353  |
| B9 | mbmm | CFP & YFP | 133.86  | 11.228  |
| B9 | mbmb | CFP & YFP | 153.567 | 35.276  |
| C1 | m    | CFP & YFP | 111.325 | 62.147  |
| C1 | b    | CFP & YFP | 130.153 | 42.236  |
| C1 | mm   | CFP & YFP | 106.656 | 59.84   |
| C1 | mb   | CFP & YFP | 132.042 | 46.115  |
| C1 | bm   | CFP & YFP | 140.256 | 51.928  |
| C1 | bb   | CFP & YFP | 119.543 | 88.126  |
| C1 | mmm  | CFP & YFP | 149.883 | 72.129  |
| C1 | mmb  | CFP & YFP | 137.086 | 51.892  |
| C1 | mmmm | CFP & YFP | 79.832  | 0       |
| C1 | mmmb | CFP & YFP | 67.164  | 0       |
| C1 | mmbm | CFP & YFP | 157.364 | 37.585  |
| C1 | mmbb | CFP & YFP | 139.403 | 5.059   |
| C3 | 0    | CFP & YFP | 97.929  | 42.689  |
| C3 | m    | CFP & YFP | 73.503  | 30.905  |
| C3 | b    | CFP & YFP | 117.796 | 85.809  |

|    |     |           |         |         |
|----|-----|-----------|---------|---------|
| C3 | mm  | CFP & YFP | 134.022 | 29.487  |
| C3 | mb  | CFP & YFP | 117.831 | 35.209  |
| C3 | bm  | CFP & YFP | 167.607 | 44.487  |
| C3 | bb  | CFP & YFP | 164.065 | 66.325  |
| C3 | mmm | CFP & YFP | 61.968  | 4.851   |
| C3 | mmb | CFP & YFP | 38.934  | 2.956   |
| C3 | bmm | CFP & YFP | 112.603 | 24.382  |
| C3 | bmb | CFP & YFP | 100.349 | 8.849   |
| C5 | 0   | CFP & YFP | 77.942  | 80.006  |
| C5 | m   | CFP & YFP | 227.865 | 74.277  |
| C5 | b   | CFP & YFP | 176.571 | 48.752  |
| C5 | mm  | CFP & YFP | 148.263 | 42.486  |
| C5 | mb  | CFP & YFP | 181.152 | 65.791  |
| C5 | bm  | CFP & YFP | 166.436 | 37.697  |
| C5 | bb  | CFP & YFP | 78.218  | 5.854   |
| C6 | 0   | CFP & YFP | 70.4    | 52.235  |
| C6 | m   | CFP & YFP | 73.624  | 44.007  |
| C6 | b   | CFP & YFP | 90.196  | 112.935 |
| C6 | mm  | CFP & YFP | 141.314 | 105.253 |
| C6 | mb  | CFP & YFP | 139.955 | 99.615  |
| C6 | bm  | CFP & YFP | 117.049 | 49.509  |
| C6 | bb  | CFP & YFP | 114.677 | 72.243  |
| C6 | mmm | CFP & YFP | 108.455 | 6.437   |
| C6 | mmb | CFP & YFP | 67.095  | 3.93    |
| C6 | mbm | CFP & YFP | 82.749  | 5.257   |
| C6 | mhb | CFP & YFP | 93.915  | 6.356   |
| C6 | bmm | CFP & YFP | 104.758 | 31.05   |
| C6 | bmb | CFP & YFP | 98.883  | 46.997  |
| C6 | bbm | CFP & YFP | 126.541 | 42.811  |
| C6 | bbb | CFP & YFP | 108.578 | 10.007  |
| C7 | m   | CFP & YFP | 129.98  | 67.738  |
| C7 | b   | CFP & YFP | 150.544 | 69.959  |
| C7 | mm  | CFP & YFP | 199.197 | 49.79   |
| C7 | mb  | CFP & YFP | 100.436 | 22.769  |
| C7 | bm  | CFP & YFP | 124.444 | 20.373  |



|       |     |           |         |         |
|-------|-----|-----------|---------|---------|
| C7    | bb  | CFP & YFP | 54.077  | 18.699  |
| C7    | mmm | CFP & YFP | 110.078 | 4.308   |
| C7    | mmb | CFP & YFP | 110.473 | 6.479   |
| C7    | mbm | CFP & YFP | 114.217 | 21.003  |
| C7    | mbb | CFP & YFP | 69.234  | 1.331   |
| C7    | bmm | CFP & YFP | 117.943 | 3.441   |
| C7    | bmb | CFP & YFP | 68.734  | 0.518   |
| C7    | bbm | CFP & YFP | 77.146  | 1.764   |
| C7    | bbb | CFP & YFP | 43.554  | 0.812   |
| C8    | 0   | CFP & YFP | 147.196 | 82.22   |
| C8    | m   | CFP & YFP | 190.518 | 86.837  |
| C8    | b   | CFP & YFP | 179.587 | 88.29   |
| C8    | mm  | CFP & YFP | 157.503 | 65.162  |
| C8    | mb  | CFP & YFP | 104.457 | 31.453  |
| C8    | bm  | CFP & YFP | 106.151 | 31.833  |
| C8    | bb  | CFP & YFP | 110.12  | 33.044  |
| C8    | mmm | CFP & YFP | 53.582  | 9.95    |
| C8    | mmb | CFP & YFP | 94.839  | 13.272  |
| C8    | mbm | CFP & YFP | 129.352 | 26.054  |
| C8    | mbb | CFP & YFP | 95.473  | 7.546   |
| C9    | m   | CFP & YFP | 125.713 | 70.439  |
| C9    | b   | CFP & YFP | 193.138 | 114.497 |
| C9    | mm  | CFP & YFP | 170.242 | 37.111  |
| C9    | mb  | CFP & YFP | 165.065 | 74.584  |
| C9    | bm  | CFP & YFP | 144.5   | 56.69   |
| C9    | bb  | CFP & YFP | 112.123 | 74.813  |
| C9    | mmm | CFP & YFP | 146.184 | 3.421   |
| C9    | mmb | CFP & YFP | 85.833  | 21.904  |
| C9    | mbm | CFP & YFP | 130.959 | 22.369  |
| C9    | mbb | CFP & YFP | 122.944 | 43.366  |
| C9    | bmm | CFP & YFP | 107.029 | 12.94   |
| C9    | bmb | CFP & YFP | 83.63   | 15.124  |
| C9    | bbm | CFP & YFP | 120.763 | 32.314  |
| C9    | bbb | CFP & YFP | 79.882  | 4.403   |
| 06_A1 | 0   | CFP & YFP | 69.825  | 33.291  |

|         |    |           |        |        |
|---------|----|-----------|--------|--------|
| 06_A1   | m  | CFP & YFP | 47.818 | 28.438 |
| 06_A1   | b  | CFP & YFP | 32.273 | 25.658 |
| 06_A1   | mm | CFP & YFP | 28.203 | 4.151  |
| 06_A1   | mb | CFP & YFP | 25.993 | 0.788  |
| 06_A1   | bm | CFP & YFP | 36.971 | 4.756  |
| 06_A1   | bb | CFP & YFP | 22.195 | 5.956  |
| 06_A7-1 | 0  | CFP & YFP | 54.025 | 22.594 |
| 06_A7-1 | m  | CFP & YFP | 27.156 | 6.37   |
| 06_A7-1 | b  | CFP & YFP | 45.044 | 18.003 |
| 06_A7-1 | mm | CFP & YFP | 26.514 | 7.522  |
| 06_A7-1 | mb | CFP & YFP | 19.211 | 8.791  |
| 06_A7-1 | bm | CFP & YFP | 34.372 | 4.524  |
| 06_A7-1 | bb | CFP & YFP | 17.867 | 0      |
| 06_A7-2 | 0  | CFP & YFP | 50.226 | 18.333 |
| 06_A7-2 | m  | CFP & YFP | 30.205 | 25.179 |
| 06_A7-2 | b  | CFP & YFP | 44.688 | 17.361 |
| 06_A7-2 | mm | CFP & YFP | 23.504 | 0.428  |
| 06_A7-2 | mb | CFP & YFP | 14.944 | 1.038  |
| 06_A7-2 | bm | CFP & YFP | 27.093 | 2.72   |
| 06_A7-2 | bb | CFP & YFP | 39.488 | 6.14   |
| 06_A9   | 0  | CFP & YFP | 55.232 | 27.868 |
| 06_A9   | m  | CFP & YFP | 57.53  | 29     |
| 06_A9   | b  | CFP & YFP | 53.437 | 34.036 |
| 06_A9   | mm | CFP & YFP | 23.581 | 1.363  |
| 06_A9   | mb | CFP & YFP | 30.607 | 5.402  |
| 06_A2-1 | 0  | CFP & YFP | 60.225 | 22.334 |
| 06_A2-1 | m  | CFP & YFP | 19.69  | 1.181  |
| 06_A2-1 | b  | CFP & YFP | 15.124 | 3.607  |
| 06_A2-1 | mm | CFP & YFP | 34.634 | 8.943  |
| 06_A2-1 | mb | CFP & YFP | 37.194 | 10.568 |
| 06_A2-2 | 0  | CFP & YFP | 70.605 | 19.404 |
| 06_A2-2 | m  | CFP & YFP | 18.639 | 2.195  |
| 06_A2-2 | b  | CFP & YFP | 19.577 | 6.479  |
| 06_A3   | 0  | CFP & YFP | 64.475 | 40.938 |
| 06_A3   | m  | CFP & YFP | 33.684 | 27.406 |

|         |    |           |        |        |
|---------|----|-----------|--------|--------|
| 06_A3   | b  | CFP & YFP | 32.283 | 29.994 |
| 06_A3   | mm | CFP & YFP | 33.434 | 4.795  |
| 06_A3   | mb | CFP & YFP | 23.235 | 2.474  |
| 06_A4-1 | 0  | CFP & YFP | 63.157 | 25.878 |
| 06_A4-1 | m  | CFP & YFP | 31.891 | 13.646 |
| 06_A4-1 | b  | CFP & YFP | 20.27  | 10.313 |
| 06_A4-2 | 0  | CFP & YFP | 38.796 | 17.745 |
| 06_A4-2 | m  | CFP & YFP | 28.58  | 11.448 |
| 06_A4-2 | b  | CFP & YFP | 27.233 | 7.856  |
| 06_A5-1 | 0  | CFP & YFP | 55.831 | 35.382 |
| 06_A5-1 | m  | CFP & YFP | 22.718 | 6.285  |
| 06_A5-1 | b  | CFP & YFP | 23.765 | 14.718 |
| 06_A5-1 | mm | CFP & YFP | 23     | 7.086  |
| 06_A5-1 | mb | CFP & YFP | 32.804 | 11.228 |
| 06_A5-1 | bm | CFP & YFP | 32.612 | 16.641 |
| 06_A5-1 | bb | CFP & YFP | 18.675 | 6.16   |
| 06_A5-2 | 0  | CFP & YFP | 54.157 | 21.126 |
| 06_A5-2 | m  | CFP & YFP | 26.553 | 5.245  |
| 06_A5-2 | b  | CFP & YFP | 21.435 | 9.356  |
| 06_A5-2 | bm | CFP & YFP | 26.313 | 4.501  |
| 06_A5-2 | bb | CFP & YFP | 29.2   | 7.519  |

*MTW1*-tagged protein segregation in spores:

These data are produced from spores that are derived from a diploid strain W7247 (*MTW1-YFP/MTW1-CFP*).

| experiment identifier | cell nomenclature | fluorescent genotype | CFP value | YFP value |
|-----------------------|-------------------|----------------------|-----------|-----------|
| A                     | 0                 | YFP                  | 60.811    | 15.333    |
| A                     | m                 | YFP                  | 69.285    | 17.429    |
| A                     | b                 | YFP                  | 46.85     | 13.021    |
| A                     | mm                | YFP                  | 44.663    | 15.059    |
| A                     | mb                | YFP                  | 32.084    | 12.081    |
| A                     | mmm               | YFP                  | 63.07     | 4.994     |
| A                     | mmb               | YFP                  | 14.242    | 11.567    |
| B                     | 0                 | CFP                  | 73.731    | 7.733     |
| B                     | m                 | CFP                  | 129.215   | 8.518     |
| B                     | b                 | CFP                  | 46.661    | 3.064     |
| B                     | mm                | CFP                  | 113.503   | 4.635     |
| B                     | mb                | CFP                  | 93.417    | 6.639     |
| B                     | bm                | CFP                  | 61.714    | 1.714     |
| B                     | bb                | CFP                  | 31.383    | 4.804     |
| C                     | 0                 | YFP                  | 93.046    | 28.996    |
| C                     | m                 | YFP                  | 30.364    | 6.005     |
| C                     | b                 | YFP                  | 13.319    | 6.613     |
| C                     | mm                | YFP                  | 32.937    | 7.744     |
| C                     | mb                | YFP                  | 38.984    | 4.563     |
| D                     | m                 | YFP                  | 135.26    | 27.687    |
| D                     | b                 | YFP                  | 72.842    | 12.725    |
| D                     | mm                | YFP                  | 16.153    | 7.886     |
| E                     | 0                 | YFP                  | 96.994    | 40.014    |
| E                     | m                 | YFP                  | 106.73    | 21.134    |
| E                     | b                 | YFP                  | 39.021    | 11.54     |
| E                     | bm                | YFP                  | 25.352    | 4.887     |
| E                     | bb                | YFP                  | 20.559    | 8.609     |
| F                     | 0                 | YFP                  | 105.983   | 30.89     |
| F                     | m                 | YFP                  | 100.159   | 21.746    |
| F                     | b                 | YFP                  | 20.571    | 1.617     |
| F                     | mm                | YFP                  | 70.153    | 7.558     |

|   |     |     |         |        |
|---|-----|-----|---------|--------|
| F | mb  | YFP | 30.167  | 3.829  |
| F | bm  | YFP | 26.388  | 4.037  |
| F | bb  | YFP | 39.7    | 7.45   |
| G | 0   | YFP | 212.093 | 22.127 |
| G | m   | YFP | 132.971 | 10.74  |
| G | b   | YFP | 27.03   | 4.943  |
| H | 0   | YFP | 155.332 | 8.894  |
| H | m   | YFP | 61.975  | 2.655  |
| H | b   | YFP | 24.316  | 4.469  |
| I | 0   | YFP | 36.86   | 12.628 |
| I | m   | YFP | 40.943  | 18.846 |
| I | b   | YFP | 23.664  | 14.592 |
| J | 0   | YFP | 33.763  | 4.938  |
| J | m   | YFP | 34.259  | 4.646  |
| J | b   | YFP | 45.694  | 4.252  |
| K | 0   | CFP | 147.69  | 12.027 |
| K | m   | CFP | 96.179  | 8.045  |
| K | b   | CFP | 43.87   | 3.002  |
| K | mm  | CFP | 155.102 | 13.808 |
| K | mb  | CFP | 55.09   | 2.593  |
| K | bm  | CFP | 27.676  | 0.989  |
| K | bb  | CFP | 27.057  | 0      |
| L | 0   | CFP | 106.099 | 7.257  |
| L | m   | CFP | 122.696 | 6.105  |
| L | b   | CFP | 26.866  | 1.007  |
| L | mm  | CFP | 92.652  | 9.672  |
| L | mb  | CFP | 27.31   | 3.009  |
| L | bm  | CFP | 20.467  | 0      |
| L | bb  | CFP | 22.721  | 0      |
| L | mbm | CFP | 33.468  | 0.165  |
| L | mbb | CFP | 32.281  | 0      |
| M | 0   | CFP | 116.349 | 6.532  |
| M | m   | CFP | 103.53  | 5.643  |
| M | b   | CFP | 39.802  | 1.374  |
| M | bm  | CFP | 40.973  | 6.429  |

|   |    |     |         |        |
|---|----|-----|---------|--------|
| M | bb | CFP | 38.65   | 0.021  |
| N | 0  | CFP | 109.498 | 14.179 |
| N | m  | CFP | 45.803  | 0.183  |
| N | b  | CFP | 46.87   | 3.002  |
| N | mm | CFP | 38.134  | 1.378  |
| N | mb | CFP | 26.486  | 0      |
| O | 0  | CFP | 145.204 | 14.955 |
| O | m  | CFP | 84.734  | 3.812  |
| O | b  | CFP | 48.864  | 6.661  |
| O | bm | CFP | 56.259  | 3.821  |
| O | bb | CFP | 47.484  | 11.769 |
| P | 0  | CFP | 182.415 | 14.605 |
| P | m  | CFP | 75.053  | 5.527  |
| P | b  | CFP | 84.638  | 1.451  |
| P | bm | CFP | 50.276  | 1.585  |
| P | bb | CFP | 44.971  | 6.537  |
| Q | 0  | CFP | 86.655  | 7.138  |
| Q | m  | CFP | 68.903  | 6.873  |
| Q | b  | CFP | 55.758  | 3.757  |
| R | 0  | CFP | 137.396 | 9.401  |
| R | m  | CFP | 99.35   | 7.497  |
| R | b  | CFP | 41.54   | 4.657  |
| R | mm | CFP | 87.036  | 5.501  |
| R | mb | CFP | 76.107  | 1.236  |
| S | 0  | CFP | 58.076  | 14.846 |
| S | m  | CFP | 96.367  | 9.084  |
| S | b  | CFP | 14.146  | 1.017  |
| S | mm | CFP | 62.072  | 5.814  |
| S | mb | CFP | 55.482  | 5.092  |
| T | 0  | YFP | 103.635 | 13.98  |
| T | m  | YFP | 89.724  | 17.868 |
| T | b  | YFP | 25.201  | 8.494  |
| U | 0  | CFP | 115.742 | 12.578 |
| U | m  | CFP | 39.989  | 1.742  |
| U | b  | CFP | 28.657  | 0.763  |

|    |    |     |         |        |
|----|----|-----|---------|--------|
| V  | 0  | YFP | 80.922  | 17.233 |
| V  | m  | YFP | 76.699  | 6.21   |
| V  | b  | YFP | 59.505  | 12.521 |
| V  | mm | YFP | 60.676  | 10.225 |
| V  | mb | YFP | 28.929  | 0      |
| W  | 0  | YFP | 62.824  | 21.753 |
| W  | m  | YFP | 24.827  | 8.911  |
| W  | b  | YFP | 104.511 | 11.194 |
| X  | 0  | YFP | 101.007 | 72.266 |
| X  | m  | YFP | 148.96  | 6.415  |
| X  | b  | YFP | 68.396  | 28.058 |
| Y  | 0  | CFP | 197.336 | 35.123 |
| Y  | m  | CFP | 167.712 | 5.841  |
| Y  | b  | CFP | 49.653  | 0      |
| Z  | 0  | YFP | 51.015  | 40.957 |
| Z  | m  | YFP | 67.186  | 20.618 |
| Z  | b  | YFP | 27.767  | 14.489 |
| Z  | mm | YFP | 85.245  | 24.315 |
| Z  | mb | YFP | 11.822  | 19.69  |
| Z  | bm | YFP | 15.646  | 3.599  |
| Z  | bb | YFP | 14.383  | 6.999  |
| AA | 0  | CFP | 161.575 | 17.955 |
| AA | m  | CFP | 62.216  | 5.558  |
| AA | b  | CFP | 40.862  | 5.938  |
| AB | 0  | YFP | 106.104 | 78.539 |
| AB | m  | YFP | 53.325  | 48.071 |
| AB | b  | YFP | 56.979  | 11.278 |
| AC | 0  | YFP | 99.824  | 55.046 |
| AC | m  | YFP | 48.871  | 24.964 |
| AC | b  | YFP | 74.814  | 5.621  |
| AD | 0  | CFP | 104.855 | 29.619 |
| AD | m  | CFP | 92.527  | 8.736  |
| AD | b  | CFP | 15.19   | 11.101 |
| AD | mm | CFP | 28.421  | 7.138  |
| AD | mb | CFP | 33.91   | 4.658  |

|       |     |     |         |         |
|-------|-----|-----|---------|---------|
| AE    | m   | YFP | 124.089 | 43.068  |
| AE    | b   | YFP | 49.934  | 34.094  |
| AE    | mm  | YFP | 158.336 | 25.044  |
| AE    | mb  | YFP | 63.547  | 36.626  |
| AE    | bm  | YFP | 44.649  | 3.568   |
| AE    | bb  | YFP | 0       | 7.595   |
| AE    | mbm | YFP | 153.613 | 31.76   |
| AE    | mbb | YFP | 85.48   | 24.976  |
| AE    | bmm | YFP | 96.173  | 29.284  |
| AE    | bmb | YFP | 62.154  | 18.574  |
| AE    | bbm | YFP | 90.184  | 22.291  |
| AE    | bbb | YFP | 57.397  | 16.339  |
| <hr/> |     |     |         |         |
| AF    | 0   | YFP | 81.024  | 35.21   |
| AF    | m   | YFP | 138.369 | 17.072  |
| AF    | b   | YFP | 69.558  | 12.422  |
| AF    | mm  | YFP | 109.719 | 39.88   |
| AF    | mb  | YFP | 65.941  | 18.584  |
| AF    | bm  | YFP | 114.371 | 132.401 |
| AF    | bb  | YFP | 67.857  | 35.386  |
| AF    | mmm | YFP | 150.706 | 12.01   |
| AF    | mmb | YFP | 62.423  | 20.503  |
| AF    | mbm | YFP | 28.676  | 5.382   |
| AF    | mbb | YFP | 16.377  | 1.821   |
| AF    | bmm | YFP | 72.769  | 7.165   |
| AF    | bmb | YFP | 72.343  | 10.646  |
| AF    | bbm | YFP | 34.979  | 3.393   |
| AF    | bbb | YFP | 14.364  | 1.848   |
| <hr/> |     |     |         |         |
| AG    | 0   | YFP | 101.24  | 30.666  |
| AG    | m   | YFP | 92.647  | 69.691  |
| AG    | b   | YFP | 74.734  | 63.09   |
| AG    | mm  | YFP | 120.465 | 42.675  |
| AG    | mb  | YFP | 143.558 | 83.645  |
| AG    | bm  | YFP | 100.701 | 56.149  |
| AG    | bb  | YFP | 83.037  | 42.118  |
| AG    | mmm | YFP | 131.156 | 46.347  |



|    |     |     |         |         |
|----|-----|-----|---------|---------|
| AG | mmb | YFP | 143.408 | 30.742  |
| AG | mbm | YFP | 140.345 | 32.819  |
| AG | mbb | YFP | 134.218 | 29.038  |
| AG | bmm | YFP | 111.557 | 33.342  |
| AG | bmb | YFP | 61.775  | 23.858  |
| AG | bbm | YFP | 97.955  | 15.463  |
| AG | bbb | YFP | 66.509  | 20.219  |
| AH | m   | YFP | 114.994 | 76.518  |
| AH | b   | YFP | 91.634  | 95.872  |
| AH | mm  | YFP | 154.135 | 105.637 |
| AH | mb  | YFP | 149.376 | 109.745 |
| AH | bm  | YFP | 131.966 | 90.837  |
| AH | bb  | YFP | 98.507  | 61.723  |
| AH | mmm | YFP | 209.145 | 76.526  |
| AH | mmb | YFP | 111.79  | 24.884  |
| AH | mbm | YFP | 155.018 | 32.499  |
| AH | mbb | YFP | 151.126 | 72.109  |
| AH | bmm | YFP | 143.223 | 60.778  |
| AH | bmb | YFP | 124.09  | 50.613  |
| AH | bbm | YFP | 112.358 | 30.313  |
| AH | bbb | YFP | 75.725  | 26.251  |
| AI | 0   | YFP | 64.753  | 74.792  |
| AI | m   | YFP | 100.88  | 35.832  |
| AI | b   | YFP | 81.071  | 38.251  |
| AJ | 0   | YFP | 49.118  | 72.586  |
| AJ | m   | YFP | 63.415  | 51.4    |
| AJ | b   | YFP | 59.134  | 46.678  |
| AJ | mm  | YFP | 18.534  | 36.574  |
| AJ | mb  | YFP | 2.22    | 47.68   |
| AJ | mmm | YFP | 102.391 | 27.824  |
| AJ | mmb | YFP | 77.845  | 24.469  |
| AK | m   | CFP | 333.205 | 11.905  |
| AK | b   | CFP | 174.577 | 4.806   |
| AK | mm  | CFP | 235.077 | 13.571  |
| AK | mb  | CFP | 202.059 | 5.648   |

|    |      |     |         |         |
|----|------|-----|---------|---------|
| AK | bm   | CFP | 239.299 | 8.275   |
| AK | bb   | CFP | 168.305 | 6.554   |
| AK | mmm  | CFP | 847.291 | 52.142  |
| AK | mmb  | CFP | 141.011 | 8.865   |
| AK | mbm  | CFP | 162.489 | 8.468   |
| AK | mbb  | CFP | 182.429 | 11.279  |
| AK | bmm  | CFP | 318.852 | 8.773   |
| AK | bmb  | CFP | 154.461 | 10.153  |
| AK | bbm  | CFP | 150.597 | 10.572  |
| AK | bbb  | CFP | 142.279 | 8.887   |
| AL | 0    | CFP | 146.767 | 17.028  |
| AL | m    | CFP | 91.236  | 1.465   |
| AL | b    | CFP | 257.543 | 5.284   |
| AL | mm   | CFP | 168.175 | 17.063  |
| AL | mb   | CFP | 151.046 | 14.423  |
| AL | bm   | CFP | 164.218 | 5.997   |
| AL | bb   | CFP | 176.773 | 10.786  |
| AL | mmm  | CFP | 182.62  | 6.964   |
| AL | mmb  | CFP | 135.3   | 0.685   |
| AL | bmm  | CFP | 136.198 | 11.952  |
| AL | bmb  | CFP | 158.232 | 14.911  |
| AL | mmmm | CFP | 154.984 | 13.11   |
| AL | mmmb | CFP | 148.414 | 13.969  |
| AM | 0    | YFP | 70.046  | 102.224 |
| AM | m    | YFP | 54.772  | 103.664 |
| AM | b    | YFP | 10.073  | 60.259  |
| AM | mm   | YFP | 102.302 | 82.459  |
| AM | mb   | YFP | 101.554 | 36.385  |
| AM | bm   | YFP | 64.131  | 43.931  |
| AM | bb   | YFP | 52.694  | 43.27   |
| AM | mmm  | YFP | 130.835 | 71.272  |
| AM | mmb  | YFP | 125.386 | 36.195  |
| AM | mbm  | YFP | 92.928  | 39.077  |
| AM | mbb  | YFP | 88.592  | 33.076  |
| AM | bmm  | YFP | 93.386  | 21.666  |

|    |     |     |         |        |
|----|-----|-----|---------|--------|
| AM | bmb | YFP | 69.226  | 22.498 |
| AN | 0   | YFP | 154.916 | 59.634 |
| AN | m   | YFP | 87.589  | 77.51  |
| AN | b   | YFP | 65.945  | 35.606 |
| AN | mm  | YFP | 142.238 | 27.566 |
| AN | mb  | YFP | 60.178  | 71.141 |
| AN | bm  | YFP | 76.922  | 13.144 |
| AN | bb  | YFP | 90.725  | 92.16  |
| AN | mmm | YFP | 120.192 | 27.112 |
| AN | mmb | YFP | 123.886 | 34.34  |
| AN | mbm | YFP | 99.92   | 25.916 |
| AN | mbb | YFP | 87.034  | 9.479  |
| AN | bmm | YFP | 109.727 | 28.485 |
| AN | bmb | YFP | 67.816  | 25.534 |
| AN | bbm | YFP | 127.72  | 43.441 |
| AN | bbb | YFP | 119.597 | 28.615 |
| AO | 0   | CFP | 340.894 | 39.654 |
| AO | m   | CFP | 358.629 | 34.486 |
| AO | b   | CFP | 224.16  | 18.71  |
| AO | mm  | CFP | 218.19  | 13.275 |
| AO | mb  | CFP | 212.911 | 18.672 |
| AO | bm  | CFP | 172.667 | 3.069  |
| AO | bb  | CFP | 128.124 | 3.828  |
| AP | 0   | CFP | 258.998 | 23.224 |
| AP | m   | CFP | 318.875 | 25.137 |
| AP | b   | CFP | 88.961  | 17.519 |
| AP | mm  | CFP | 236.298 | 19.098 |
| AP | mb  | CFP | 90.521  | 12.781 |
| AP | bm  | CFP | 134.93  | 12.817 |
| AP | bb  | CFP | 62.967  | 24.173 |
| AP | mmm | CFP | 231.46  | 8.342  |
| AP | mmb | CFP | 119.378 | 9.41   |
| AQ | 0   | CFP | 61.265  | 11.352 |
| AQ | m   | CFP | 79.286  | 1.416  |
| AQ | b   | CFP | 78.809  | 4.499  |

|       |      |     |         |        |
|-------|------|-----|---------|--------|
| AQ    | mm   | CFP | 116.881 | 12.604 |
| AQ    | mb   | CFP | 66.842  | 7.634  |
| AQ    | bm   | CFP | 81.888  | 4.629  |
| AQ    | bb   | CFP | 158.263 | 16.916 |
| AQ    | mmm  | CFP | 258.596 | 11.331 |
| AQ    | mmb  | CFP | 58.734  | 13.325 |
| AQ    | mbm  | CFP | 24.331  | 2.136  |
| AQ    | mbb  | CFP | 16.667  | 1.827  |
| AQ    | bmm  | CFP | 65.11   | 4.02   |
| AQ    | bmb  | CFP | 59.204  | 4.018  |
| <hr/> |      |     |         |        |
| AR    | 0    | YFP | 76.377  | 35.874 |
| AR    | m    | YFP | 121.831 | 70.818 |
| AR    | b    | YFP | 83.304  | 51.661 |
| AR    | mm   | YFP | 134.522 | 38.086 |
| AR    | mb   | YFP | 73.703  | 23.822 |
| AR    | bm   | YFP | 79.768  | 32.833 |
| AR    | bb   | YFP | 66.079  | 23.161 |
| AR    | mmm  | YFP | 185.284 | 18.551 |
| AR    | mmb  | YFP | 120.497 | 2.469  |
| AR    | bmm  | YFP | 104.052 | 0.876  |
| AR    | bmb  | YFP | 86.823  | 1.662  |
| <hr/> |      |     |         |        |
| AS    | 0    | CFP | 85.236  | 5.964  |
| AS    | m    | CFP | 174.062 | 7.674  |
| AS    | b    | CFP | 180.62  | 9.869  |
| AS    | mm   | CFP | 91.037  | 7.27   |
| AS    | mb   | CFP | 109.092 | 2.917  |
| AS    | bm   | CFP | 136.183 | 5.023  |
| AS    | bb   | CFP | 98.294  | 4.233  |
| AS    | mmm  | CFP | 68.605  | 1.043  |
| AS    | mmb  | CFP | 44.509  | 0      |
| AS    | mbm  | CFP | 116.013 | 4.679  |
| AS    | mbb  | CFP | 91.093  | 6.679  |
| AS    | bmm  | CFP | 125.093 | 4.681  |
| AS    | bmb  | CFP | 136.303 | 4.081  |
| AS    | mmmm | CFP | 126.82  | 6.051  |

---

|    |      |     |         |        |
|----|------|-----|---------|--------|
| AS | mmmb | CFP | 73.284  | 2.876  |
| AT | 0    | CFP | 169.457 | 18.095 |
| AT | m    | CFP | 216.264 | 6.871  |
| AT | b    | CFP | 180.948 | 11.348 |
| AT | mm   | CFP | 60.632  | 3.603  |
| AT | mb   | CFP | 40.237  | 2.969  |
| AT | bm   | CFP | 58.601  | 4.144  |
| AT | bb   | CFP | 59.892  | 6.01   |
| AT | mmm  | CFP | 118.782 | 1.195  |
| AT | mmb  | CFP | 113.515 | 7.557  |
| AT | mbm  | CFP | 78.749  | 6.577  |
| AT | mbb  | CFP | 78.446  | 9.126  |

---

*HTA1*-tagged protein segregation in spores:

These data are produced from spores that are derived from a diploid strain W7912 (*HTA1-YFP/HTA1-CFP*).

| experiment identifier | cell nomenclature | fluorescent genotype | CFP value | YFP value |
|-----------------------|-------------------|----------------------|-----------|-----------|
| HTA1-1                | 0                 | YFP                  | 27.08     | 107.564   |
| HTA1-1                | m                 | YFP                  | 14.623    | 75.695    |
| HTA1-1                | b                 | YFP                  | 15.831    | 85.677    |
| HTA1-1                | mm                | YFP                  | 8.993     | 60.768    |
| HTA1-1                | mb                | YFP                  | 11.161    | 80.754    |
| HTA1-1                | bm                | YFP                  | 10.192    | 70.779    |
| HTA1-1                | bb                | YFP                  | 10.123    | 70.925    |
| HTA1-1                | mmm               | YFP                  | 6.481     | 39.806    |
| HTA1-1                | mmb               | YFP                  | 6.382     | 41.084    |
| HTA1-1                | mbm               | YFP                  | 8.053     | 49.993    |
| HTA1-1                | mbb               | YFP                  | 7.988     | 52.28     |
| HTA1-1                | bmm               | YFP                  | 5.702     | 35.25     |
| HTA1-1                | bmb               | YFP                  | 6.572     | 39.323    |
| HTA1-1                | bbm               | YFP                  | 6.147     | 33.771    |
| HTA1-1                | bbb               | YFP                  | 7.393     | 39.335    |
| HTA1-2                | 0                 | CFP                  | 108.099   | 58.357    |
| HTA1-2                | m                 | CFP                  | 53.569    | 19.143    |
| HTA1-2                | b                 | CFP                  | 63.633    | 23.138    |
| HTA1-2                | mm                | CFP                  | 45.819    | 9.944     |
| HTA1-2                | mb                | CFP                  | 56.367    | 12.447    |
| HTA1-2                | bm                | CFP                  | 52.294    | 11.651    |
| HTA1-2                | bb                | CFP                  | 61.972    | 14.095    |
| HTA1-2                | mmm               | CFP                  | 44.667    | 7.965     |
| HTA1-2                | mmb               | CFP                  | 50.265    | 8.974     |
| HTA1-2                | mbm               | CFP                  | 45.152    | 8.317     |
| HTA1-2                | mbb               | CFP                  | 57.131    | 9.703     |
| HTA1-2                | bmm               | CFP                  | 44.505    | 7.396     |
| HTA1-2                | bmb               | CFP                  | 55.75     | 9.771     |
| HTA1-2                | bbm               | CFP                  | 48.606    | 9.626     |
| HTA1-2                | bbb               | CFP                  | 55.138    | 11.118    |
| HTA1-3                | 0                 | YFP                  | 35.934    | 190.082   |

|        |     |     |         |         |
|--------|-----|-----|---------|---------|
| HTA1-3 | m   | YFP | 13.462  | 116.35  |
| HTA1-3 | b   | YFP | 10.216  | 104.311 |
| HTA1-3 | mm  | YFP | 7.083   | 73.187  |
| HTA1-3 | mb  | YFP | 6.327   | 74.639  |
| HTA1-3 | bm  | YFP | 5.268   | 74.898  |
| HTA1-3 | bb  | YFP | 6.632   | 93.624  |
| HTA1-3 | mmm | YFP | 3.49    | 43.811  |
| HTA1-3 | mmb | YFP | 4.717   | 57.493  |
| HTA1-3 | mbm | YFP | 3.993   | 60.023  |
| HTA1-3 | mbb | YFP | 4.315   | 65.417  |
| HTA1-3 | bmm | YFP | 4.831   | 79.875  |
| HTA1-3 | bmb | YFP | 4.067   | 75.468  |
| HTA1-3 | bbm | YFP | 4.404   | 71.604  |
| HTA1-3 | bbb | YFP | 4.929   | 83.126  |
| <hr/>  |     |     |         |         |
| HTA1-4 | 0   | CFP | 79.707  | 60.786  |
| HTA1-4 | m   | CFP | 61.333  | 31.52   |
| HTA1-4 | b   | CFP | 63.322  | 32.941  |
| HTA1-4 | mm  | CFP | 52.418  | 13.182  |
| HTA1-4 | mb  | CFP | 65.78   | 17.574  |
| HTA1-4 | bm  | CFP | 55.316  | 17.725  |
| HTA1-4 | bb  | CFP | 64.094  | 19.984  |
| HTA1-4 | mmm | CFP | 42.5505 | 4.3445  |
| HTA1-4 | mmb | CFP | 69.499  | 6.167   |
| HTA1-4 | mbm | CFP | 36.06   | 9.097   |
| HTA1-4 | mbb | CFP | 45.178  | 10.958  |
| HTA1-4 | bmm | CFP | 32.2855 | 5.8005  |
| HTA1-4 | bmb | CFP | 60.216  | 11.754  |
| HTA1-4 | bbm | CFP | 38.823  | 10.623  |
| HTA1-4 | bbb | CFP | 37.693  | 9.878   |

*ASK1*-tagged protein segregation in haploid cells:

These data are produced from two haploid strains, J1501 (*ASK1-YFP*) and J1502 (*ASK1-CFP*).

| experiment identifier | cell nomenclature | fluorescent genotype | CFP value | YFP value |
|-----------------------|-------------------|----------------------|-----------|-----------|
| Ask1-A1               | m                 | CFP                  | 4242.44   | -         |
| Ask1-A1               | b                 | CFP                  | 3267.77   | -         |
| Ask1-A1               | mm                | CFP                  | 1423.659  | -         |
| Ask1-A1               | mb                | CFP                  | 1791.549  | -         |
| Ask1-A1               | bm                | CFP                  | 1752.839  | -         |
| Ask1-A1               | bb                | CFP                  | 1911.209  | -         |
| Ask1-A1               | mmm               | CFP                  | 794.401   | -         |
| Ask1-A1               | mmb               | CFP                  | 852.881   | -         |
| Ask1-A1               | mbm               | CFP                  | 1136.531  | -         |
| Ask1-A1               | mbb               | CFP                  | 1661.441  | -         |
| Ask1-A1               | bmm               | CFP                  | 1259.991  | -         |
| Ask1-A1               | bmb               | CFP                  | 1328.941  | -         |
| Ask1-A1               | bbm               | CFP                  | 916.648   | -         |
| Ask1-A1               | bbb               | CFP                  | 825.718   | -         |
| Ask1-A1               | mmmm              | CFP                  | 262.385   | -         |
| Ask1-A1               | mmmb              | CFP                  | 1033.718  | -         |
| Ask1-A2               | 0                 | CFP                  | 3656.896  | -         |
| Ask1-A2               | m                 | CFP                  | 1754.368  | -         |
| Ask1-A2               | b                 | CFP                  | 2423.748  | -         |
| Ask1-A2               | mm                | CFP                  | 1226.256  | -         |
| Ask1-A2               | mb                | CFP                  | 1889.256  | -         |
| Ask1-A2               | bm                | CFP                  | 1482.93   | -         |
| Ask1-A2               | bb                | CFP                  | 853.37    | -         |
| Ask1-A2               | mmm               | CFP                  | 799.01    | -         |
| Ask1-A2               | mmb               | CFP                  | 758.62    | -         |
| Ask1-A3               | 0                 | CFP                  | 5007.669  | -         |
| Ask1-A3               | m                 | CFP                  | 2712.793  | -         |
| Ask1-A3               | b                 | CFP                  | 2463.713  | -         |
| Ask1-A3               | mm                | CFP                  | 737.273   | -         |
| Ask1-A3               | mb                | CFP                  | 1840.093  | -         |
| Ask1-A4               | 0                 | CFP                  | 1751.108  | -         |



|         |     |     |          |   |
|---------|-----|-----|----------|---|
| Ask1-A4 | m   | CFP | 2896.158 | - |
| Ask1-A4 | b   | CFP | 2633.788 | - |
| Ask1-A4 | mm  | CFP | 2085.132 | - |
| Ask1-A4 | mb  | CFP | 1358.672 | - |
| Ask1-A4 | bm  | CFP | 1397.382 | - |
| Ask1-A4 | bb  | CFP | 1352.272 | - |
| Ask1-A4 | mmm | CFP | 965.584  | - |
| Ask1-A4 | mmb | CFP | 1100.574 | - |
| Ask1-A4 | mbm | CFP | 1140.504 | - |
| Ask1-A4 | mbb | CFP | 996.594  | - |
| Ask1-A4 | bmm | CFP | 573.315  | - |
| Ask1-A4 | bmb | CFP | 785.143  | - |
| <hr/>   |     |     |          |   |
| Ask1-A5 | 0   | CFP | 2201.122 | - |
| Ask1-A5 | m   | CFP | 3047.073 | - |
| Ask1-A5 | b   | CFP | 1834.663 | - |
| Ask1-A5 | mm  | CFP | 1495.052 | - |
| Ask1-A5 | mb  | CFP | 1622.772 | - |
| Ask1-A5 | bm  | CFP | 1274.192 | - |
| Ask1-A5 | bb  | CFP | 1781.632 | - |
| Ask1-A5 | mmm | CFP | 439.709  | - |
| Ask1-A5 | mmb | CFP | 563.871  | - |
| Ask1-A5 | bmm | CFP | 411.429  | - |
| Ask1-A5 | bmb | CFP | 692.055  | - |
| <hr/>   |     |     |          |   |
| Ask1-A6 | 0   | CFP | 3763.793 | - |
| Ask1-A6 | m   | CFP | 2841.097 | - |
| Ask1-A6 | b   | CFP | 2787.107 | - |
| Ask1-A6 | mm  | CFP | 1413.839 | - |
| Ask1-A6 | mb  | CFP | 1205.519 | - |
| Ask1-A6 | bm  | CFP | 1122.719 | - |
| Ask1-A6 | bb  | CFP | 1676.379 | - |
| <hr/>   |     |     |          |   |
| Ask1-A7 | 0   | CFP | 3981.795 | - |
| Ask1-A7 | m   | CFP | 1773.214 | - |
| Ask1-A7 | b   | CFP | 2322.154 | - |
| Ask1-A7 | mm  | CFP | 1508.33  | - |
| Ask1-A7 | mb  | CFP | 1683.32  | - |

|         |      |     |          |   |
|---------|------|-----|----------|---|
| Ask1-A7 | bm   | CFP | 1198.888 | - |
| Ask1-A7 | bb   | CFP | 1415.248 | - |
| Ask1-A7 | mmm  | CFP | 481.566  | - |
| Ask1-A7 | mmb  | CFP | 858.278  | - |
| Ask1-A8 | 0    | CFP | 1953.751 | - |
| Ask1-A8 | m    | CFP | 1937.835 | - |
| Ask1-A8 | b    | CFP | 2474.795 | - |
| Ask1-A8 | mm   | CFP | 1394.887 | - |
| Ask1-A8 | mb   | CFP | 905.197  | - |
| Ask1-A9 | m    | CFP | 2688.671 | - |
| Ask1-A9 | b    | CFP | 4797.261 | - |
| Ask1-A9 | mm   | CFP | 2319.443 | - |
| Ask1-A9 | mb   | CFP | 3349.873 | - |
| Ask1-A9 | bm   | CFP | 2274.113 | - |
| Ask1-A9 | bb   | CFP | 5623.986 | - |
| Ask1-A9 | mmm  | CFP | 779.687  | - |
| Ask1-A9 | mmb  | CFP | 1180.377 | - |
| Ask1-A9 | mbm  | CFP | 932.277  | - |
| Ask1-A9 | mhb  | CFP | 1087.717 | - |
| Ask1-B2 | 0    | CFP | 3739.256 | - |
| Ask1-B2 | m    | CFP | 3594.784 | - |
| Ask1-B2 | b    | CFP | 2267.254 | - |
| Ask1-B2 | mm   | CFP | 1831.191 | - |
| Ask1-B2 | mb   | CFP | 1908.021 | - |
| Ask1-B2 | bm   | CFP | 1600.541 | - |
| Ask1-B2 | bb   | CFP | 1467.021 | - |
| Ask1-B2 | mmm  | CFP | 444.248  | - |
| Ask1-B2 | mmb  | CFP | 963.105  | - |
| Ask1-B2 | mbm  | CFP | 440.799  | - |
| Ask1-B2 | mhb  | CFP | 1265.205 | - |
| Ask1-B2 | bmm  | CFP | 334.818  | - |
| Ask1-B2 | bmb  | CFP | 310.068  | - |
| Ask1-B2 | mmmm | CFP | 324.201  | - |
| Ask1-B2 | mmmb | CFP | 189.762  | - |
| Ask1-B4 | 0    | CFP | 582.088  | - |

|         |      |     |          |         |
|---------|------|-----|----------|---------|
| Ask1-B4 | m    | CFP | 1375.761 | -       |
| Ask1-B4 | b    | CFP | 1323.791 | -       |
| Ask1-B4 | mm   | CFP | 1090.545 | -       |
| Ask1-B4 | mb   | CFP | 870.865  | -       |
| Ask1-B4 | bm   | CFP | 1008.252 | -       |
| Ask1-B4 | bb   | CFP | 925.972  | -       |
| Ask1-B4 | mmm  | CFP | 915.585  | -       |
| Ask1-B4 | mmb  | CFP | 860.105  | -       |
| Ask1-B4 | mbm  | CFP | 522.151  | -       |
| Ask1-B4 | mbb  | CFP | 562.403  | -       |
| Ask1-B4 | bmm  | CFP | 644.009  | -       |
| Ask1-B4 | bmb  | CFP | 949.145  | -       |
| Ask1-B4 | bbm  | CFP | 498.378  | -       |
| Ask1-B4 | bbb  | CFP | 302.75   | -       |
| Ask1-B4 | bmmm | CFP | 346.684  | -       |
| Ask1-B4 | bmbb | CFP | 390.654  | -       |
| Ask1-B5 | 0    | CFP | 5070.357 | -       |
| Ask1-B5 | m    | CFP | 2189.688 | -       |
| Ask1-B5 | b    | CFP | 1594.968 | -       |
| Ask1-B7 | m    | CFP | 3511.744 | -       |
| Ask1-B7 | b    | CFP | 4010.064 | -       |
| Ask1-B8 | m    | CFP | 2518.917 | -       |
| Ask1-B8 | b    | CFP | 3540.497 | -       |
| Ask1-B8 | mm   | CFP | 1886.857 | -       |
| Ask1-B8 | mb   | CFP | 2366.047 | -       |
| Ask1-B8 | bm   | CFP | 1188.727 | -       |
| Ask1-B8 | bb   | CFP | 2490.437 | -       |
| Ask1-B9 | 0    | CFP | 5594.604 | -       |
| Ask1-B9 | m    | CFP | 1765.847 | -       |
| Ask1-B9 | b    | CFP | 1640.167 | -       |
| Ask1-B9 | mm   | CFP | 1902.855 | -       |
| Ask1-B9 | mb   | CFP | 1403.305 | -       |
| Ask1-C1 | 0    | YFP | -        | 454.153 |
| Ask1-C1 | m    | YFP | -        | 403.185 |
| Ask1-C1 | b    | YFP | -        | 334.95  |

|         |     |     |   |         |
|---------|-----|-----|---|---------|
| Ask1-C3 | 0   | YFP | - | 422.415 |
| Ask1-C3 | m   | YFP | - | 342.565 |
| Ask1-C3 | b   | YFP | - | 254.333 |
| Ask1-C4 | m   | YFP | - | 257.727 |
| Ask1-C4 | b   | YFP | - | 281.052 |
| Ask1-C4 | bm  | YFP | - | 111.111 |
| Ask1-C4 | bb  | YFP | - | 87.124  |
| Ask1-C4 | bmm | YFP | - | 87.843  |
| Ask1-C4 | bmb | YFP | - | 47.645  |
| Ask1-C5 | m   | YFP | - | 367.808 |
| Ask1-C5 | b   | YFP | - | 421.728 |
| Ask1-C7 | 0   | YFP | - | 497.497 |
| Ask1-C7 | m   | YFP | - | 381.133 |
| Ask1-C7 | b   | YFP | - | 352.607 |
| Ask1-C8 | 0   | YFP | - | 536.518 |
| Ask1-C8 | m   | YFP | - | 264.974 |
| Ask1-C8 | b   | YFP | - | 358.486 |
| Ask1-D1 | m   | YFP | - | 628.122 |
| Ask1-D1 | b   | YFP | - | 741.072 |
| Ask1-D1 | mm  | YFP | - | 293.192 |
| Ask1-D1 | mb  | YFP | - | 284.301 |
| Ask1-D1 | bm  | YFP | - | 178.405 |
| Ask1-D1 | bb  | YFP | - | 123.694 |
| Ask1-D1 | mmm | YFP | - | 70.938  |
| Ask1-D1 | mmb | YFP | - | 50.355  |
| Ask1-D1 | mbm | YFP | - | 86.556  |
| Ask1-D1 | mbb | YFP | - | 50.654  |
| Ask1-D1 | bmm | YFP | - | 114.53  |
| Ask1-D1 | bmb | YFP | - | 150.751 |
| Ask1-D1 | bbm | YFP | - | 82.167  |
| Ask1-D1 | bbb | YFP | - | 148.252 |
| Ask1-D2 | 0   | YFP | - | 511.347 |
| Ask1-D2 | m   | YFP | - | 405.667 |
| Ask1-D2 | b   | YFP | - | 221.273 |
| Ask1-D2 | mm  | YFP | - | 183.079 |

|         |     |     |   |          |
|---------|-----|-----|---|----------|
| Ask1-D2 | mb  | YFP | - | 190.092  |
| Ask1-D3 | 0   | YFP | - | 1047.735 |
| Ask1-D3 | m   | YFP | - | 291.826  |
| Ask1-D3 | b   | YFP | - | 443.768  |
| Ask1-D3 | mm  | YFP | - | 133.256  |
| Ask1-D3 | mb  | YFP | - | 70.671   |
| Ask1-D4 | m   | YFP | - | 486.893  |
| Ask1-D4 | b   | YFP | - | 554.065  |
| Ask1-D4 | mm  | YFP | - | 220.405  |
| Ask1-D4 | mb  | YFP | - | 165.541  |
| Ask1-D4 | bm  | YFP | - | 145.04   |
| Ask1-D4 | bb  | YFP | - | 211.698  |
| Ask1-D4 | mmm | YFP | - | 170.656  |
| Ask1-D4 | mmb | YFP | - | 180.925  |
| Ask1-D4 | bmm | YFP | - | 145.054  |
| Ask1-D4 | bmb | YFP | - | 156.403  |
| Ask1-D5 | 0   | YFP | - | 713.443  |
| Ask1-D5 | m   | YFP | - | 657.083  |
| Ask1-D5 | b   | YFP | - | 551.206  |
| Ask1-D5 | mm  | YFP | - | 171.539  |
| Ask1-D5 | mb  | YFP | - | 201.253  |
| Ask1-D5 | bm  | YFP | - | 252.64   |
| Ask1-D5 | bb  | YFP | - | 259.647  |
| Ask1-D5 | mmm | YFP | - | 164.147  |
| Ask1-D5 | mmb | YFP | - | 123.782  |
| Ask1-D5 | bmm | YFP | - | 108.852  |
| Ask1-D5 | bmb | YFP | - | 120.682  |
| Ask1-D6 | 0   | YFP | - | 465.691  |
| Ask1-D6 | m   | YFP | - | 374.494  |
| Ask1-D6 | b   | YFP | - | 414.662  |
| Ask1-D6 | mm  | YFP | - | 164.234  |
| Ask1-D6 | mb  | YFP | - | 197.688  |
| Ask1-D6 | bm  | YFP | - | 138.84   |
| Ask1-D6 | bb  | YFP | - | 254.696  |
| Ask1-D6 | mbm | YFP | - | 158.021  |

|         |     |     |   |         |
|---------|-----|-----|---|---------|
| Ask1-D6 | mbb | YFP | - | 267.489 |
| Ask1-D7 | m   | YFP | - | 489.407 |
| Ask1-D7 | b   | YFP | - | 461.725 |
| Ask1-D7 | bm  | YFP | - | 329.823 |
| Ask1-D7 | bb  | YFP | - | 274.959 |
| Ask1-D7 | bmm | YFP | - | 165.352 |
| Ask1-D7 | bmb | YFP | - | 145.701 |
| Ask1-D7 | bbm | YFP | - | 128.882 |
| Ask1-D7 | bbb | YFP | - | 165.11  |
| Ask1-D8 | 0   | YFP | - | 546.193 |
| Ask1-D8 | m   | YFP | - | 297.528 |
| Ask1-D8 | b   | YFP | - | 216.169 |
| Ask1-D8 | mm  | YFP | - | 242.43  |
| Ask1-D8 | mb  | YFP | - | 159.567 |
| Ask1-D9 | m   | YFP | - | 366.619 |
| Ask1-D9 | b   | YFP | - | 373.747 |

*ASK1*-tagged protein segregation in diploid cells:

These data are produced from a diploid strain W7908 (*ASK1-YFP/ASK1-CFP*).

| experiment identifier | cell nomenclature | fluorescent genotype | CFP value | YFP value |
|-----------------------|-------------------|----------------------|-----------|-----------|
| ASK1dip-A1            | 0                 | CFP & YFP            | 348.358   | 282.768   |
| ASK1dip-A1            | m                 | CFP & YFP            | 291.855   | 234.619   |
| ASK1dip-A1            | b                 | CFP & YFP            | 270.791   | 200.592   |
| ASK1dip-A1            | mm                | CFP & YFP            | 116.281   | 54.151    |
| ASK1dip-A1            | mb                | CFP & YFP            | 162.621   | 77.292    |
| ASK1dip-A2-1          | 0                 | CFP & YFP            | 324.188   | 158.339   |
| ASK1dip-A2-1          | m                 | CFP & YFP            | 220.878   | 50.434    |
| ASK1dip-A2-1          | b                 | CFP & YFP            | 302.208   | 102.19    |
| ASK1dip-A2-1          | mm                | CFP & YFP            | 196.668   | 50.42     |
| ASK1dip-A2-1          | mb                | CFP & YFP            | 190.769   | 41.053    |
| ASK1dip-A2-1          | bm                | CFP & YFP            | 106.067   | 19.669    |
| ASK1dip-A2-1          | bb                | CFP & YFP            | 118.407   | 32.883    |
| ASK1dip-A2-2          | 0                 | CFP & YFP            | 525.025   | 273.366   |
| ASK1dip-A2-2          | m                 | CFP & YFP            | 194.654   | 43.781    |
| ASK1dip-A2-2          | b                 | CFP & YFP            | 274.307   | 73.552    |
| ASK1dip-A2-2          | mm                | CFP & YFP            | 235.606   | 314.899   |
| ASK1dip-A2-2          | mb                | CFP & YFP            | 231.532   | 37.724    |
| ASK1dip-A3            | 0                 | CFP & YFP            | 187.465   | -4.739    |
| ASK1dip-A3            | m                 | CFP & YFP            | 303.569   | 63.406    |
| ASK1dip-A3            | b                 | CFP & YFP            | 454.706   | 81.092    |
| ASK1dip-A3            | mm                | CFP & YFP            | 146.079   | 27.708    |
| ASK1dip-A3            | mb                | CFP & YFP            | 135.56    | 5.594     |
| ASK1dip-A3            | bm                | CFP & YFP            | 95.403    | 22.335    |
| ASK1dip-A3            | bb                | CFP & YFP            | 149.449   | 10.896    |
| ASK1dip-A4            | m                 | CFP & YFP            | 420.032   | 353.314   |
| ASK1dip-A4            | b                 | CFP & YFP            | 520.682   | 277.076   |
| ASK1dip-A4            | mm                | CFP & YFP            | 122.674   | 23.343    |
| ASK1dip-A4            | mb                | CFP & YFP            | 105.875   | 53.719    |
| ASK1dip-A4            | bm                | CFP & YFP            | 132.476   | 23.726    |
| ASK1dip-A4            | bb                | CFP & YFP            | 244.344   | 63.89     |
| ASK1dip-A4            | mmm               | CFP & YFP            | 181.465   | 5.143     |

|            |     |           |         |         |
|------------|-----|-----------|---------|---------|
| ASK1dip-A4 | mmb | CFP & YFP | 216.325 | 49.701  |
| ASK1dip-A4 | mbm | CFP & YFP | 160.851 | 27.525  |
| ASK1dip-A4 | mhb | CFP & YFP | 89.411  | 25.154  |
| ASK1dip-A5 | 0   | CFP & YFP | 373.686 | 443.694 |
| ASK1dip-A5 | m   | CFP & YFP | 263.592 | 207.437 |
| ASK1dip-A5 | b   | CFP & YFP | 147.164 | 55.741  |
| ASK1dip-A5 | mm  | CFP & YFP | 191.228 | 98.128  |
| ASK1dip-A5 | mb  | CFP & YFP | 174.95  | 90.387  |
| ASK1dip-A5 | bm  | CFP & YFP | 117.696 | 13.273  |
| ASK1dip-A5 | bb  | CFP & YFP | 188.644 | 62.155  |
| ASK1dip-A6 | 0   | CFP & YFP | 794.346 | 452.433 |
| ASK1dip-A6 | m   | CFP & YFP | 58.497  | 64.394  |
| ASK1dip-A6 | b   | CFP & YFP | 334.426 | 164.737 |
| ASK1dip-A6 | mm  | CFP & YFP | 104.46  | 29.355  |
| ASK1dip-A6 | mb  | CFP & YFP | 290.704 | 59.218  |
| ASK1dip-A6 | bm  | CFP & YFP | 222.631 | 31.424  |
| ASK1dip-A6 | bb  | CFP & YFP | 252.664 | 36.234  |
| ASK1dip-A7 | 0   | CFP & YFP | 501.192 | 358.197 |
| ASK1dip-A7 | m   | CFP & YFP | 277.387 | 95.813  |
| ASK1dip-A7 | b   | CFP & YFP | 261.606 | 79.77   |
| ASK1dip-A7 | mm  | CFP & YFP | 112.283 | 25.566  |
| ASK1dip-A7 | mb  | CFP & YFP | 162.261 | 39.349  |
| ASK1dip-A8 | 0   | CFP & YFP | 35.838  | 108.497 |
| ASK1dip-A8 | m   | CFP & YFP | 69.678  | 43.947  |
| ASK1dip-A8 | b   | CFP & YFP | 142.486 | 127.337 |
| ASK1dip-A8 | mm  | CFP & YFP | 101.178 | 46.831  |
| ASK1dip-A8 | mb  | CFP & YFP | 197.55  | 75.535  |
| ASK1dip-A8 | bm  | CFP & YFP | 60.732  | 45.552  |
| ASK1dip-A8 | bb  | CFP & YFP | 41.846  | 34.407  |
| ASK1dip-A8 | mmm | CFP & YFP | 101.875 | 22.162  |
| ASK1dip-A8 | mmb | CFP & YFP | 191.604 | 53.458  |
| ASK1dip-A8 | bmm | CFP & YFP | 167.923 | 28.623  |
| ASK1dip-A8 | bmb | CFP & YFP | 197.104 | 16.339  |
| ASK1dip-A8 | bbm | CFP & YFP | 151.006 | 27.04   |
| ASK1dip-A8 | bbb | CFP & YFP | 112.602 | 7.158   |



|            |      |           |         |         |
|------------|------|-----------|---------|---------|
| ASK1dip-A8 | mbm  | CFP & YFP | 181.958 | 23.713  |
| ASK1dip-A8 | mbb  | CFP & YFP | 177.151 | 20.53   |
| ASK1dip-A9 | m    | CFP & YFP | 42.979  | 34.152  |
| ASK1dip-A9 | b    | CFP & YFP | 107.726 | 92.866  |
| ASK1dip-A9 | mm   | CFP & YFP | 181.546 | 105.566 |
| ASK1dip-A9 | mb   | CFP & YFP | 125.988 | 102.3   |
| ASK1dip-A9 | bm   | CFP & YFP | 116.278 | 15.238  |
| ASK1dip-A9 | bb   | CFP & YFP | 175.245 | 80.577  |
| ASK1dip-A9 | mmm  | CFP & YFP | 185.701 | 60.298  |
| ASK1dip-A9 | mmb  | CFP & YFP | 144.875 | 21.533  |
| ASK1dip-A9 | mbm  | CFP & YFP | 120.144 | 23.518  |
| ASK1dip-A9 | mbb  | CFP & YFP | 131.72  | 41.914  |
| ASK1dip-A9 | bmm  | CFP & YFP | 146.431 | 23.719  |
| ASK1dip-A9 | bmb  | CFP & YFP | 212.985 | 26.25   |
| ASK1dip-B1 | m    | CFP & YFP | 596.359 | 220.776 |
| ASK1dip-B1 | b    | CFP & YFP | 387.959 | 206.738 |
| ASK1dip-B1 | mm   | CFP & YFP | 328.111 | 84.416  |
| ASK1dip-B1 | mb   | CFP & YFP | 378.281 | 116.158 |
| ASK1dip-B1 | bm   | CFP & YFP | 314.61  | 93.917  |
| ASK1dip-B1 | bb   | CFP & YFP | 286.54  | 91.126  |
| ASK1dip-B1 | mmm  | CFP & YFP | 236.17  | 39.12   |
| ASK1dip-B1 | mmb  | CFP & YFP | 302.18  | 55.21   |
| ASK1dip-B1 | mbm  | CFP & YFP | 225.85  | 42.448  |
| ASK1dip-B1 | mbb  | CFP & YFP | 237.61  | 41.504  |
| ASK1dip-B1 | mmmm | CFP & YFP | 233.781 | 35.503  |
| ASK1dip-B1 | mmmb | CFP & YFP | 214.681 | 54.545  |
| ASK1dip-B1 | mbmm | CFP & YFP | 309.381 | 66.767  |
| ASK1dip-B1 | mbmb | CFP & YFP | 211.811 | 31.357  |
| ASK1dip-B2 | 0    | CFP & YFP | 457.052 | 237.247 |
| ASK1dip-B2 | m    | CFP & YFP | 320.958 | 134.171 |
| ASK1dip-B2 | b    | CFP & YFP | 316.868 | 153.559 |
| ASK1dip-B2 | mm   | CFP & YFP | 173.108 | 65.691  |
| ASK1dip-B2 | mb   | CFP & YFP | 379.515 | 116.987 |
| ASK1dip-B2 | bm   | CFP & YFP | 367.765 | 134.461 |
| ASK1dip-B2 | bb   | CFP & YFP | 210.824 | 82.663  |

|             |     |           |         |         |
|-------------|-----|-----------|---------|---------|
| ASK1 dip-B2 | mmm | CFP & YFP | 139.036 | 4.039   |
| ASK1 dip-B2 | mmb | CFP & YFP | 106.205 | 11.013  |
| ASK1 dip-B2 | mbm | CFP & YFP | 126.896 | 9.543   |
| ASK1 dip-B2 | mbb | CFP & YFP | 125.722 | 8.186   |
| ASK1 dip-B2 | bmm | CFP & YFP | 120.395 | 13.804  |
| ASK1 dip-B2 | bmb | CFP & YFP | 142.483 | 4.617   |
| ASK1 dip-B2 | bbm | CFP & YFP | 96.489  | 28.098  |
| ASK1 dip-B2 | bbb | CFP & YFP | 73.439  | 2.278   |
| ASK1 dip-B3 | 0   | CFP & YFP | 470.629 | 294.273 |
| ASK1 dip-B3 | m   | CFP & YFP | 298.841 | 133.058 |
| ASK1 dip-B3 | b   | CFP & YFP | 289.231 | 141.854 |
| ASK1 dip-B3 | mm  | CFP & YFP | 263.473 | 80.487  |
| ASK1 dip-B3 | mb  | CFP & YFP | 192.026 | 74.72   |
| ASK1 dip-B3 | bm  | CFP & YFP | 213.866 | 56.274  |
| ASK1 dip-B3 | bb  | CFP & YFP | 226.136 | 73.804  |
| ASK1 dip-B3 | mmm | CFP & YFP | 157.172 | 20.488  |
| ASK1 dip-B3 | mmb | CFP & YFP | 169.982 | 22.627  |
| ASK1 dip-B3 | mbm | CFP & YFP | 131.949 | 22.497  |
| ASK1 dip-B3 | mbb | CFP & YFP | 179.572 | 43.134  |
| ASK1 dip-B3 | bmm | CFP & YFP | 162.482 | 28.911  |
| ASK1 dip-B3 | bmb | CFP & YFP | 166.642 | 41.384  |
| ASK1 dip-B4 | 0   | CFP & YFP | 691.937 | 347.88  |
| ASK1 dip-B4 | m   | CFP & YFP | 820.539 | 139.014 |
| ASK1 dip-B4 | b   | CFP & YFP | 277.244 | 106.94  |
| ASK1 dip-B4 | mm  | CFP & YFP | 210.393 | 59.203  |
| ASK1 dip-B4 | mb  | CFP & YFP | 206.029 | 50.572  |
| ASK1 dip-B4 | bm  | CFP & YFP | 196.841 | 47.519  |
| ASK1 dip-B4 | bb  | CFP & YFP | 162.181 | 47.822  |
| ASK1 dip-B5 | 0   | CFP & YFP | 506.018 | 195.555 |
| ASK1 dip-B5 | m   | CFP & YFP | 181.287 | 168.497 |
| ASK1 dip-B5 | b   | CFP & YFP | 27.651  | 53.807  |
| ASK1 dip-B5 | mm  | CFP & YFP | 42.967  | 66.316  |
| ASK1 dip-B5 | mb  | CFP & YFP | 40.469  | 37.852  |
| ASK1 dip-B5 | bm  | CFP & YFP | 95.296  | 41.791  |
| ASK1 dip-B5 | bb  | CFP & YFP | 41.312  | 37.691  |

|             |     |           |         |         |
|-------------|-----|-----------|---------|---------|
| ASK1 dip-B5 | mmm | CFP & YFP | 170.633 | 38.066  |
| ASK1 dip-B5 | mmb | CFP & YFP | 255.023 | 35.656  |
| ASK1 dip-B5 | mbm | CFP & YFP | 159.203 | 11.901  |
| ASK1 dip-B5 | mbb | CFP & YFP | 152.453 | 27.47   |
| ASK1 dip-B5 | bmm | CFP & YFP | 158.383 | 10.326  |
| ASK1 dip-B5 | bmb | CFP & YFP | 156.123 | 9.441   |
| ASK1 dip-B6 | 0   | CFP & YFP | 522.637 | 258.86  |
| ASK1 dip-B6 | m   | CFP & YFP | 107.773 | 7.336   |
| ASK1 dip-B6 | b   | CFP & YFP | 220.124 | 91.342  |
| ASK1 dip-B6 | mm  | CFP & YFP | 140.735 | 12.317  |
| ASK1 dip-B6 | mb  | CFP & YFP | 79.457  | 5.107   |
| ASK1 dip-B6 | bm  | CFP & YFP | 83.376  | 10.301  |
| ASK1 dip-B6 | bb  | CFP & YFP | 109.161 | 16.335  |
| ASK1 dip-B7 | 0   | CFP & YFP | 561.411 | 215.612 |
| ASK1 dip-B7 | m   | CFP & YFP | 49.733  | 17.242  |
| ASK1 dip-B7 | b   | CFP & YFP | 92.453  | 74.388  |
| ASK1 dip-B7 | mm  | CFP & YFP | 89.806  | 0.992   |
| ASK1 dip-B7 | mb  | CFP & YFP | 126.895 | 41.65   |
| ASK1 dip-B7 | bm  | CFP & YFP | 57.534  | 40.537  |
| ASK1 dip-B7 | bb  | CFP & YFP | 99.763  | 27.226  |
| ASK1 dip-B8 | 0   | CFP & YFP | 460.818 | 278.226 |
| ASK1 dip-B8 | m   | CFP & YFP | 62.439  | 66.225  |
| ASK1 dip-B8 | b   | CFP & YFP | 42.455  | 22.048  |
| ASK1 dip-B8 | mm  | CFP & YFP | 75.78   | 1.531   |
| ASK1 dip-B8 | mb  | CFP & YFP | 53.347  | 21.368  |

*ASK1*-tagged protein segregation in spores:

These data are produced from spores that are derived from a diploid strain W7908 (*ASK1-YFP/ASK1-CFP*).

| experiment identifier | cell nomenclature | fluorescent genotype | CFP value | YFP value |
|-----------------------|-------------------|----------------------|-----------|-----------|
| ASK1-A1               | 0                 | YFP                  | 83.481    | 67.143    |
| ASK1-A1               | m                 | YFP                  | 94.967    | 43.213    |
| ASK1-A1               | b                 | YFP                  | 49.811    | 57.636    |
| ASK1-A4               | 0                 | CFP                  | 175.885   | 21.97     |
| ASK1-A4               | m                 | CFP                  | 142.719   | 7.5       |
| ASK1-A4               | b                 | CFP                  | 147.757   | 6.416     |
| ASK1-A4               | mm                | CFP                  | 136.413   | 8.449     |
| ASK1-A4               | mb                | CFP                  | 126.364   | 10.988    |
| ASK1-A4               | bm                | CFP                  | 167.673   | 7.82      |
| ASK1-A4               | bb                | CFP                  | 133.34    | 8.151     |
| ASK1-A4               | mmm               | CFP                  | 120.15    | 4.431     |
| ASK1-A4               | mmb               | CFP                  | 75.025    | 1.84      |
| ASK1-A4               | mbm               | CFP                  | 74.079    | 3.664     |
| ASK1-A4               | mbb               | CFP                  | 95.971    | 0         |
| ASK1-A4               | bmm               | CFP                  | 131.237   | 0.673     |
| ASK1-A4               | bmb               | CFP                  | 155.396   | 4.414     |
| ASK1-A5-1             | 0                 | YFP                  | 75.846    | 59.975    |
| ASK1-A5-1             | m                 | YFP                  | 40.991    | 16.361    |
| ASK1-A5-1             | b                 | YFP                  | 56.968    | 35.272    |
| ASK1-A5-1             | mm                | YFP                  | 55.416    | 23.439    |
| ASK1-A5-1             | mb                | YFP                  | 67.509    | 32.217    |
| ASK1-A5-1             | bm                | YFP                  | 45.382    | 29.152    |
| ASK1-A5-1             | bb                | YFP                  | 70.179    | 34.794    |
| ASK1-A5-2             | 0                 | YFP                  | 405.488   | 66.604    |
| ASK1-A5-2             | m                 | YFP                  | 102.31    | 21.149    |
| ASK1-A5-2             | b                 | YFP                  | 80.779    | 61.959    |
| ASK1-A5-2             | mm                | YFP                  | 116.563   | 31.598    |
| ASK1-A5-2             | mb                | YFP                  | 92.183    | 34.02     |
| ASK1-A5-2             | bm                | YFP                  | 92.647    | 69.089    |
| ASK1-A5-2             | bb                | YFP                  | 100.498   | 39.287    |
| ASK1-A8               | 0                 | YFP                  | 88.388    | 96.21     |

|         |     |     |          |         |
|---------|-----|-----|----------|---------|
| ASK1-A8 | m   | YFP | 59.976   | 47.937  |
| ASK1-A8 | b   | YFP | 62.55    | 64.185  |
| ASK1-A8 | mm  | YFP | 74.784   | 57.946  |
| ASK1-A8 | mb  | YFP | 78.779   | 58.12   |
| ASK1-A8 | bm  | YFP | 75.577   | 44.38   |
| ASK1-A8 | bb  | YFP | 88.551   | 129.244 |
| ASK1-A9 | 0   | YFP | 217.613  | 115.683 |
| ASK1-A9 | m   | YFP | 489.758  | 114.093 |
| ASK1-A9 | b   | YFP | 77.917   | 80.689  |
| ASK1-A9 | mm  | YFP | 95.737   | 15.846  |
| ASK1-A9 | mb  | YFP | 76.454   | 37.494  |
| ASK1-B1 | 0   | YFP | 152.13   | 74.496  |
| ASK1-B1 | m   | YFP | 224.272  | 51.072  |
| ASK1-B1 | b   | YFP | 63.531   | 17.433  |
| ASK1-B1 | mm  | YFP | 81.352   | 15.663  |
| ASK1-B1 | mb  | YFP | 59.758   | 24.088  |
| ASK1-B1 | bm  | YFP | 77.944   | 15.524  |
| ASK1-B1 | bb  | YFP | 71.926   | 23.983  |
| ASK1-B1 | mmm | YFP | 132.03   | 28.114  |
| ASK1-B1 | mmb | YFP | 71.317   | 17.708  |
| ASK1-B1 | mbm | YFP | 49.592   | 26.863  |
| ASK1-B1 | mhb | YFP | 33.621   | 13.603  |
| ASK1-B2 | m   | CFP | 494.954  | 28.335  |
| ASK1-B2 | b   | CFP | 357.243  | 19.153  |
| ASK1-B2 | mm  | CFP | 2132.426 | 94.454  |
| ASK1-B2 | mb  | CFP | 290.027  | 7.917   |
| ASK1-B2 | bm  | CFP | 365.718  | 12.329  |
| ASK1-B2 | bb  | CFP | 347.026  | 9.487   |
| ASK1-B2 | mmm | CFP | 198.99   | 7.701   |
| ASK1-B2 | mmb | CFP | 202.702  | 9.826   |
| ASK1-B2 | mbm | CFP | 122.999  | 4.687   |
| ASK1-B2 | mhb | CFP | 177.487  | 10.233  |
| ASK1-B2 | bmm | CFP | 181.08   | 13.718  |
| ASK1-B2 | bmb | CFP | 216.228  | 4.294   |
| ASK1-B2 | bbm | CFP | 139.663  | 3.72    |

|           |     |     |         |         |
|-----------|-----|-----|---------|---------|
| ASK1-B2   | bbb | CFP | 160.834 | 8.45    |
| ASK1-B3   | 0   | CFP | 616.094 | 44.533  |
| ASK1-B3   | m   | CFP | 199.255 | 14.009  |
| ASK1-B3   | b   | CFP | 168.562 | 12.576  |
| ASK1-B3   | mm  | CFP | 103.618 | 20.545  |
| ASK1-B3   | mb  | CFP | 80.805  | 12.29   |
| ASK1-B3   | bm  | CFP | 113.745 | 18.382  |
| ASK1-B3   | bb  | CFP | 123.855 | 15.138  |
| ASK1-B5-1 | 0   | CFP | 571.616 | 27.38   |
| ASK1-B5-1 | m   | CFP | 177.08  | 53.979  |
| ASK1-B5-1 | b   | CFP | 88.069  | 28.88   |
| ASK1-B5-1 | bm  | CFP | 84.427  | 10.623  |
| ASK1-B5-1 | bb  | CFP | 74.567  | 3.495   |
| ASK1-C1   | 0   | YFP | 443.453 | 16.464  |
| ASK1-C1   | m   | YFP | 271.376 | 167.245 |
| ASK1-C1   | b   | YFP | 93.732  | 141.053 |
| ASK1-C1   | mm  | YFP | 154.385 | 82.377  |
| ASK1-C1   | mb  | YFP | 80.677  | 59.332  |
| ASK1-C1   | bm  | YFP | 95.433  | 90.467  |
| ASK1-C1   | bb  | YFP | 95.845  | 95.303  |
| ASK1-C1   | mmm | YFP | 123.965 | 45.304  |
| ASK1-C1   | mmb | YFP | 99.55   | 34.342  |
| ASK1-C1   | mbm | YFP | 82.838  | 31.369  |
| ASK1-C1   | mbb | YFP | 81.805  | 28.887  |
| ASK1-C1   | bmm | YFP | 96.446  | 66.042  |
| ASK1-C1   | bmb | YFP | 107.669 | 45.701  |
| ASK1-C1   | bbm | YFP | 96.689  | 29.072  |
| ASK1-C1   | bbb | YFP | 102.087 | 25.475  |
| ASK1-C3   | 0   | CFP | 385.03  | 32.619  |
| ASK1-C3   | m   | CFP | 313.33  | 20.616  |
| ASK1-C3   | b   | CFP | 298.985 | 18.79   |
| ASK1-C3   | mm  | CFP | 180.677 | 11.439  |
| ASK1-C3   | mb  | CFP | 151.794 | 11.084  |
| ASK1-C3   | bm  | CFP | 161.513 | 10.56   |
| ASK1-C3   | bb  | CFP | 177.117 | 8.344   |

|         |     |     |         |         |
|---------|-----|-----|---------|---------|
| ASK1-C3 | mmm | CFP | 120.192 | 5.009   |
| ASK1-C3 | mmb | CFP | 82.159  | 2.877   |
| ASK1-C3 | mbm | CFP | 102.676 | 2.603   |
| ASK1-C3 | mbb | CFP | 141.444 | 5.28    |
| ASK1-C3 | bmm | CFP | 155.206 | 7.436   |
| ASK1-C3 | bmb | CFP | 97.377  | 26.906  |
| ASK1-C5 | 0   | YFP | 654.947 | 107.048 |
| ASK1-C5 | m   | YFP | 338.808 | 74.21   |
| ASK1-C5 | b   | YFP | 117.524 | 81.416  |
| ASK1-C5 | mm  | YFP | 259.093 | 78.274  |
| ASK1-C5 | mb  | YFP | 82.084  | 52.024  |
| ASK1-C5 | bm  | YFP | 110.009 | 87.62   |
| ASK1-C5 | bb  | YFP | 121.483 | 90.394  |
| ASK1-C5 | bmm | YFP | 108.951 | 30.172  |
| ASK1-C5 | bmb | YFP | 123.519 | 29.44   |
| ASK1-C6 | 0   | CFP | 341.597 | 26.773  |
| ASK1-C6 | m   | CFP | 231.282 | 9.686   |
| ASK1-C6 | b   | CFP | 204.296 | 16.097  |
| ASK1-C6 | mm  | CFP | 163.795 | 4.528   |
| ASK1-C6 | mb  | CFP | 215.361 | 7.166   |
| ASK1-C6 | bm  | CFP | 111.698 | 5.855   |
| ASK1-C6 | bb  | CFP | 147.373 | 2.249   |
| ASK1-C6 | mmm | CFP | 148.06  | 5.902   |
| ASK1-C6 | mmb | CFP | 98.915  | 3.055   |
| ASK1-C6 | mbm | CFP | 143.123 | 1.46    |
| ASK1-C6 | mbb | CFP | 89.288  | 0       |
| ASK1-C6 | bmm | CFP | 140.492 | 2.319   |
| ASK1-C6 | bmb | CFP | 141.275 | 4.011   |
| ASK1-C7 | 0   | CFP | 406.597 | 39.691  |
| ASK1-C7 | m   | CFP | 301.995 | 23.094  |
| ASK1-C7 | b   | CFP | 279.298 | 12.928  |
| ASK1-C7 | mm  | CFP | 549.166 | 28.385  |
| ASK1-C7 | mb  | CFP | 163.926 | 14.522  |
| ASK1-C7 | bm  | CFP | 232.81  | 11.172  |
| ASK1-C7 | bb  | CFP | 245.037 | 12.274  |

|           |      |     |         |        |
|-----------|------|-----|---------|--------|
| ASK1-C7   | mmm  | CFP | 200.278 | 10.772 |
| ASK1-C7   | mmb  | CFP | 79.475  | 4.37   |
| ASK1-C7   | mbm  | CFP | 121.674 | 5.932  |
| ASK1-C7   | mbb  | CFP | 140.115 | 5.608  |
| ASK1-C7   | bmm  | CFP | 116.367 | 4.904  |
| ASK1-C7   | bmb  | CFP | 142.8   | 5.486  |
| ASK1-C7   | mmmm | CFP | 137.278 | 13.1   |
| ASK1-C7   | mmmb | CFP | 141.796 | 8.961  |
| ASK1-C7   | bmmm | CFP | 107.112 | 6.061  |
| ASK1-C7   | bmbb | CFP | 86.22   | 10.998 |
| ASK1-C8-1 | 0    | YFP | 337.381 | 60.186 |
| ASK1-C8-1 | m    | YFP | 321.034 | 70.243 |
| ASK1-C8-1 | b    | YFP | 85.2    | 66.593 |
| ASK1-C8-1 | mm   | YFP | 272.261 | 40.485 |
| ASK1-C8-1 | mb   | YFP | 102.156 | 27.837 |
| ASK1-C8-1 | bm   | YFP | 82.571  | 32.504 |
| ASK1-C8-1 | bb   | YFP | 75.351  | 26.48  |
| ASK1-C8-2 | 0    | CFP | 261.391 | 20.383 |
| ASK1-C8-2 | m    | CFP | 405.736 | 15.986 |
| ASK1-C8-2 | b    | CFP | 150.23  | 8.188  |
| ASK1-C8-2 | mm   | CFP | 339.315 | 15.708 |
| ASK1-C8-2 | mb   | CFP | 132.817 | 4.616  |
| ASK1-C8-2 | bm   | CFP | 139.671 | 3.114  |
| ASK1-C8-2 | bb   | CFP | 92.418  | 4.281  |
| ASK1-C8-2 | mmm  | CFP | 225.447 | 12.462 |
| ASK1-C8-2 | mmb  | CFP | 105.973 | 4.698  |
| ASK1-C9   | m    | CFP | 191.122 | 10.973 |
| ASK1-C9   | b    | CFP | 218.978 | 16.746 |
| ASK1-C9   | mm   | CFP | 204.469 | 12.638 |
| ASK1-C9   | mb   | CFP | 96.978  | 1.645  |
| ASK1-C9   | bm   | CFP | 140.835 | 9.44   |
| ASK1-C9   | bb   | CFP | 151.476 | 6.433  |
| ASK1-C9   | mmm  | CFP | 146.663 | 15.308 |
| ASK1-C9   | mmb  | CFP | 172.519 | 6.57   |
| ASK1-C9   | mbm  | CFP | 95.57   | 12.793 |



|         |     |     |         |        |
|---------|-----|-----|---------|--------|
| ASK1-C9 | mbb | CFP | 79.817  | 6.965  |
| ASK1-C9 | bmm | CFP | 145.497 | 1.963  |
| ASK1-C9 | bmb | CFP | 107     | 10.838 |
| ASK1-C9 | bbm | CFP | 168.032 | 10.121 |
| ASK1-C9 | bbb | CFP | 142.409 | 8.687  |

---

*NDC10*-tagged protein segregation in haploid cells:

These data are produced from two haploid strains, W7871-2A (*NDC10-YFP*) and W7872-1D (*NDC10-CFP*).

| experiment identifier | cell nomenclature | fluorescent genotype | CFP value | YFP value |
|-----------------------|-------------------|----------------------|-----------|-----------|
| Ndc10-A1              | 0                 | CFP                  | 736.875   | -         |
| Ndc10-A1              | m                 | CFP                  | 463.476   | -         |
| Ndc10-A1              | b                 | CFP                  | 1104.152  | -         |
| Ndc10-A1              | mm                | CFP                  | 447.387   | -         |
| Ndc10-A1              | mb                | CFP                  | 487.43    | -         |
| Ndc10-A1              | bm                | CFP                  | 326.592   | -         |
| Ndc10-A1              | bb                | CFP                  | 285.543   | -         |
| Ndc10-A2              | m                 | CFP                  | 711.406   | -         |
| Ndc10-A2              | b                 | CFP                  | 574.697   | -         |
| Ndc10-A2              | mm                | CFP                  | 310.507   | -         |
| Ndc10-A2              | mb                | CFP                  | 311.151   | -         |
| Ndc10-A2              | bm                | CFP                  | 234.724   | -         |
| Ndc10-A2              | bb                | CFP                  | 249.168   | -         |
| Ndc10-A2              | mmm               | CFP                  | 254.308   | -         |
| Ndc10-A2              | mmb               | CFP                  | 283.595   | -         |
| Ndc10-A3              | m                 | CFP                  | 414.049   | -         |
| Ndc10-A3              | b                 | CFP                  | 585.776   | -         |
| Ndc10-A3              | mm                | CFP                  | 299.985   | -         |
| Ndc10-A3              | mb                | CFP                  | 317.231   | -         |
| Ndc10-A4              | 0                 | CFP                  | 549.391   | -         |
| Ndc10-A4              | m                 | CFP                  | 513.945   | -         |
| Ndc10-A4              | b                 | CFP                  | 405.39    | -         |
| Ndc10-A4              | mm                | CFP                  | 305.525   | -         |
| Ndc10-A4              | mb                | CFP                  | 363.931   | -         |
| Ndc10-A4              | bm                | CFP                  | 494.745   | -         |
| Ndc10-A4              | bb                | CFP                  | 379.433   | -         |
| Ndc10-A5              | 0                 | CFP                  | 754.874   | -         |
| Ndc10-A5              | m                 | CFP                  | 510.19    | -         |
| Ndc10-A5              | b                 | CFP                  | 387.434   | -         |
| Ndc10-A5              | mm                | CFP                  | 270.244   | -         |
| Ndc10-A5              | mb                | CFP                  | 210.336   | -         |

|            |     |     |         |   |
|------------|-----|-----|---------|---|
| Ndc10-A5   | bm  | CFP | 198.611 | - |
| Ndc10-A5   | bb  | CFP | 187.807 | - |
| Ndc10-A6   | 0   | CFP | 419.074 | - |
| Ndc10-A6   | m   | CFP | 146.167 | - |
| Ndc10-A6   | b   | CFP | 296.615 | - |
| Ndc10-A6   | mm  | CFP | 283.287 | - |
| Ndc10-A6   | mb  | CFP | 190.523 | - |
| Ndc10-A6   | bm  | CFP | 171.159 | - |
| Ndc10-A6   | bb  | CFP | 142.788 | - |
| Ndc10-A7   | 0   | CFP | 483.631 | - |
| Ndc10-A7   | m   | CFP | 315.862 | - |
| Ndc10-A7   | b   | CFP | 348.646 | - |
| Ndc10-A8   | m   | CFP | 475.19  | - |
| Ndc10-A8   | b   | CFP | 430.29  | - |
| Ndc10-A8   | mm  | CFP | 399.979 | - |
| Ndc10-A8   | mb  | CFP | 298.282 | - |
| Ndc10-A8   | bm  | CFP | 231.626 | - |
| Ndc10-A8   | bb  | CFP | 336.091 | - |
| Ndc10-A9-r | 0   | CFP | 601.538 | - |
| Ndc10-A9-r | m   | CFP | 330.905 | - |
| Ndc10-A9-r | b   | CFP | 234.285 | - |
| Ndc10-A9-r | mm  | CFP | 172.215 | - |
| Ndc10-A9-r | mb  | CFP | 235.78  | - |
| Ndc10-A9-r | bm  | CFP | 158.127 | - |
| Ndc10-A9-r | bb  | CFP | 136.402 | - |
| Ndc10-A9-r | mmm | CFP | 139.577 | - |
| Ndc10-A9-r | mmb | CFP | 94.433  | - |
| Ndc10-A9-l | 0   | CFP | 486.116 | - |
| Ndc10-A9-l | m   | CFP | 185.48  | - |
| Ndc10-A9-l | b   | CFP | 263.329 | - |
| Ndc10-A9-l | mm  | CFP | 133.349 | - |
| Ndc10-A9-l | mb  | CFP | 170.682 | - |
| Ndc10-B1   | 0   | CFP | 280.843 | - |
| Ndc10-B1   | m   | CFP | 257.588 | - |
| Ndc10-B1   | b   | CFP | 348.567 | - |

|            |    |     |         |         |
|------------|----|-----|---------|---------|
| Ndc10-B3-r | 0  | CFP | 257.088 | -       |
| Ndc10-B3-r | m  | CFP | 166.501 | -       |
| Ndc10-B3-r | b  | CFP | 278.186 | -       |
| Ndc10-B3-l | 0  | CFP | 356.03  | -       |
| Ndc10-B3-l | m  | CFP | 303.614 | -       |
| Ndc10-B3-l | b  | CFP | 229.318 | -       |
| Ndc10-B4   | 0  | CFP | 235.829 | -       |
| Ndc10-B4   | m  | CFP | 457.739 | -       |
| Ndc10-B4   | b  | CFP | 290.927 | -       |
| Ndc10-B7   | 0  | CFP | 175.569 | -       |
| Ndc10-B7   | m  | CFP | 217.905 | -       |
| Ndc10-B7   | b  | CFP | 214.375 | -       |
| Ndc10-B9   | 0  | CFP | 270.819 | -       |
| Ndc10-B9   | m  | CFP | 185.343 | -       |
| Ndc10-B9   | b  | CFP | 128.965 | -       |
| Ndc10-C3   | 0  | YFP | -       | 386.845 |
| Ndc10-C3   | m  | YFP | -       | 214.863 |
| Ndc10-C3   | b  | YFP | -       | 322.984 |
| Ndc10-C4   | 0  | YFP | -       | 453.436 |
| Ndc10-C4   | m  | YFP | -       | 153.361 |
| Ndc10-C4   | b  | YFP | -       | 164.384 |
| Ndc10-C4   | mm | YFP | -       | 89.78   |
| Ndc10-C4   | mb | YFP | -       | 56.84   |
| Ndc10-C4   | bm | YFP | -       | 105.15  |
| Ndc10-C4   | bb | YFP | -       | 66.234  |
| Ndc10-C5-u | 0  | YFP | -       | 227.182 |
| Ndc10-C5-u | m  | YFP | -       | 141.062 |
| Ndc10-C5-u | b  | YFP | -       | 158.72  |
| Ndc10-C5-u | mm | YFP | -       | 172.334 |
| Ndc10-C5-u | mb | YFP | -       | 183.179 |
| Ndc10-C5-u | bm | YFP | -       | 139.167 |
| Ndc10-C5-u | bb | YFP | -       | 114.441 |
| Ndc10-C5-l | 0  | YFP | -       | 226.236 |
| Ndc10-C5-l | m  | YFP | -       | 113.098 |
| Ndc10-C5-l | b  | YFP | -       | 136.826 |

|            |     |     |   |         |
|------------|-----|-----|---|---------|
| Ndc10-C6   | m   | YFP | - | 389.897 |
| Ndc10-C6   | b   | YFP | - | 339.963 |
| Ndc10-C6   | mm  | YFP | - | 132.574 |
| Ndc10-C6   | mb  | YFP | - | 157.471 |
| Ndc10-C6   | bm  | YFP | - | 142.802 |
| Ndc10-C6   | bb  | YFP | - | 94.139  |
| Ndc10-C6   | bmm | YFP | - | 83.979  |
| Ndc10-C6   | bmb | YFP | - | 110.969 |
| Ndc10-C7   | 0   | YFP | - | 204.284 |
| Ndc10-C7   | m   | YFP | - | 239.389 |
| Ndc10-C7   | b   | YFP | - | 232.672 |
| Ndc10-C7   | mm  | YFP | - | 76.502  |
| Ndc10-C7   | mb  | YFP | - | 134.467 |
| Ndc10-C7   | bm  | YFP | - | 155.293 |
| Ndc10-C7   | bb  | YFP | - | 113.066 |
| Ndc10-C8-u | 0   | YFP | - | 360.427 |
| Ndc10-C8-u | m   | YFP | - | 287.686 |
| Ndc10-C8-u | b   | YFP | - | 361.999 |
| Ndc10-C8-u | mm  | YFP | - | 296.957 |
| Ndc10-C8-u | mb  | YFP | - | 197.812 |
| Ndc10-C8-u | bm  | YFP | - | 179.106 |
| Ndc10-C8-u | bb  | YFP | - | 211.087 |
| Ndc10-C8-l | 0   | YFP | - | 240.262 |
| Ndc10-C8-l | m   | YFP | - | 231.657 |
| Ndc10-C8-l | b   | YFP | - | 208.603 |
| Ndc10-C9-u | 0   | YFP | - | 398.675 |
| Ndc10-C9-u | m   | YFP | - | 174.238 |
| Ndc10-C9-u | b   | YFP | - | 395.671 |
| Ndc10-C9-l | 0   | YFP | - | 395.894 |
| Ndc10-C9-l | m   | YFP | - | 325.804 |
| Ndc10-C9-l | b   | YFP | - | 101.289 |
| Ndc10-D1   | m   | YFP | - | 310.04  |
| Ndc10-D1   | b   | YFP | - | 312.039 |
| Ndc10-D1   | mm  | YFP | - | 188.108 |
| Ndc10-D1   | mb  | YFP | - | 291.13  |

|          |      |     |   |         |
|----------|------|-----|---|---------|
| Ndc10-D1 | bm   | YFP | - | 241.69  |
| Ndc10-D1 | bb   | YFP | - | 173.637 |
| Ndc10-D1 | mmm  | YFP | - | 228.4   |
| Ndc10-D1 | mmb  | YFP | - | 129.375 |
| Ndc10-D2 | m    | YFP | - | 333.116 |
| Ndc10-D2 | b    | YFP | - | 287.324 |
| Ndc10-D2 | mm   | YFP | - | 221.514 |
| Ndc10-D2 | mb   | YFP | - | 399.036 |
| Ndc10-D2 | mmm  | YFP | - | 233.044 |
| Ndc10-D2 | mmb  | YFP | - | 248.835 |
| Ndc10-D2 | mbm  | YFP | - | 188.616 |
| Ndc10-D2 | mbb  | YFP | - | 259.454 |
| Ndc10-D2 | mmmm | YFP | - | 329.513 |
| Ndc10-D2 | mmmb | YFP | - | 193.942 |
| Ndc10-D2 | mmbm | YFP | - | 152.924 |
| Ndc10-D2 | mmbb | YFP | - | 219.963 |
| Ndc10-D3 | m    | YFP | - | 345.098 |
| Ndc10-D3 | b    | YFP | - | 209.57  |
| Ndc10-D3 | mm   | YFP | - | 346.965 |
| Ndc10-D3 | mb   | YFP | - | 168.186 |
| Ndc10-D3 | bm   | YFP | - | 307.858 |
| Ndc10-D3 | bb   | YFP | - | 180.599 |
| Ndc10-D3 | mmm  | YFP | - | 311.556 |
| Ndc10-D3 | mmb  | YFP | - | 288.865 |
| Ndc10-D4 | 0    | YFP | - | 335.596 |
| Ndc10-D4 | m    | YFP | - | 224.991 |
| Ndc10-D4 | b    | YFP | - | 286.59  |
| Ndc10-D4 | mm   | YFP | - | 219.419 |
| Ndc10-D4 | mb   | YFP | - | 189.977 |
| Ndc10-D4 | bm   | YFP | - | 250.807 |
| Ndc10-D4 | bb   | YFP | - | 216.353 |
| Ndc10-D4 | bmm  | YFP | - | 366.935 |
| Ndc10-D4 | bmb  | YFP | - | 200.935 |
| Ndc10-D4 | mbm  | YFP | - | 207.842 |
| Ndc10-D4 | mbb  | YFP | - | 209.842 |

|            |    |     |   |         |
|------------|----|-----|---|---------|
| Ndc10-D5-u | 0  | YFP | - | 402.468 |
| Ndc10-D5-u | m  | YFP | - | 300.929 |
| Ndc10-D5-u | b  | YFP | - | 252.415 |
| Ndc10-D5-u | mm | YFP | - | 120.635 |
| Ndc10-D5-u | mb | YFP | - | 221.195 |
| Ndc10-D5-l | 0  | YFP | - | 205.489 |
| Ndc10-D5-l | m  | YFP | - | 214.284 |
| Ndc10-D5-l | b  | YFP | - | 275.346 |
| Ndc10-D5-l | mm | YFP | - | 266.05  |
| Ndc10-D5-l | mb | YFP | - | 213.484 |
| Ndc10-D6-u | 0  | YFP | - | 415.477 |
| Ndc10-D6-u | m  | YFP | - | 162.714 |
| Ndc10-D6-u | b  | YFP | - | 213.333 |
| Ndc10-D6-u | mm | YFP | - | 114.666 |
| Ndc10-D6-u | mb | YFP | - | 136.592 |
| Ndc10-D6-u | bm | YFP | - | 242.563 |
| Ndc10-D6-u | bb | YFP | - | 123.585 |
| Ndc10-D6-l | 0  | YFP | - | 191.049 |
| Ndc10-D6-l | mm | YFP | - | 196.827 |
| Ndc10-D6-l | mb | YFP | - | 126.979 |
| Ndc10-D7-l | 0  | YFP | - | 310.308 |
| Ndc10-D7-l | m  | YFP | - | 368.99  |
| Ndc10-D7-l | b  | YFP | - | 227.119 |
| Ndc10-D7-l | bm | YFP | - | 205.782 |
| Ndc10-D7-l | bb | YFP | - | 200.517 |
| Ndc10-D7-r | 0  | YFP | - | 327.939 |
| Ndc10-D7-r | m  | YFP | - | 166.759 |
| Ndc10-D7-r | b  | YFP | - | 267.632 |
| Ndc10-D7-r | mm | YFP | - | 218.977 |
| Ndc10-D7-r | mb | YFP | - | 175.761 |
| Ndc10-D8   | m  | YFP | - | 303.88  |
| Ndc10-D8   | b  | YFP | - | 324.256 |
| Ndc10-D8   | mm | YFP | - | 421.415 |
| Ndc10-D8   | mb | YFP | - | 282.316 |
| Ndc10-D8   | bm | YFP | - | 156.457 |

|          |      |     |   |         |
|----------|------|-----|---|---------|
| Ndc10-D8 | bb   | YFP | - | 144.034 |
| Ndc10-D8 | mmm  | YFP | - | 161.98  |
| Ndc10-D8 | mmb  | YFP | - | 237.449 |
| Ndc10-D8 | mbm  | YFP | - | 215.711 |
| Ndc10-D8 | mbb  | YFP | - | 304.209 |
| Ndc10-D8 | bmm  | YFP | - | 284.645 |
| Ndc10-D8 | bmb  | YFP | - | 183.66  |
| Ndc10-D8 | mmmm | YFP | - | 173.279 |
| Ndc10-D8 | mmmb | YFP | - | 214.296 |
| <hr/>    |      |     |   |         |
| Ndc10-D9 | 0    | YFP | - | 598.084 |
| Ndc10-D9 | m    | YFP | - | 303.797 |
| Ndc10-D9 | b    | YFP | - | 515.428 |
| Ndc10-D9 | mm   | YFP | - | 124.575 |
| Ndc10-D9 | mb   | YFP | - | 325.288 |
| Ndc10-D9 | bm   | YFP | - | 176.122 |
| Ndc10-D9 | bb   | YFP | - | 251.109 |
| Ndc10-D9 | mmm  | YFP | - | 160.014 |
| Ndc10-D9 | mmb  | YFP | - | 155.875 |
| Ndc10-D9 | mbm  | YFP | - | 181.733 |
| Ndc10-D9 | mbb  | YFP | - | 183.386 |
| <hr/>    |      |     |   |         |
| Ndc10-E1 | 0    | YFP | - | 332.063 |
| Ndc10-E1 | m    | YFP | - | 173.273 |
| Ndc10-E1 | b    | YFP | - | 226.103 |
| Ndc10-E1 | mm   | YFP | - | 88.174  |
| Ndc10-E1 | mb   | YFP | - | 104.79  |
| Ndc10-E1 | bm   | YFP | - | 76.107  |
| Ndc10-E1 | bb   | YFP | - | 71.529  |
| Ndc10-E1 | mmm  | YFP | - | 52.52   |
| Ndc10-E1 | mmb  | YFP | - | 75.753  |
| <hr/>    |      |     |   |         |
| Ndc10-E2 | 0    | YFP | - | 279.164 |
| Ndc10-E2 | m    | YFP | - | 390.555 |
| Ndc10-E2 | b    | YFP | - | 190.342 |
| Ndc10-E2 | mm   | YFP | - | 223.756 |
| Ndc10-E2 | mb   | YFP | - | 240.986 |
| Ndc10-E2 | bm   | YFP | - | 113.917 |



|          |     |     |   |         |
|----------|-----|-----|---|---------|
| Ndc10-E2 | bb  | YFP | - | 154.329 |
| Ndc10-E2 | mmm | YFP | - | 90.938  |
| Ndc10-E2 | mmb | YFP | - | 105.037 |
| Ndc10-E2 | mbm | YFP | - | 136.296 |
| Ndc10-E2 | mbb | YFP | - | 100.674 |
| <hr/>    |     |     |   |         |
| Ndc10-E3 | 0   | YFP | - | 607.023 |
| Ndc10-E3 | m   | YFP | - | 414.629 |
| Ndc10-E3 | b   | YFP | - | 242.551 |
| Ndc10-E3 | mm  | YFP | - | 151.245 |
| Ndc10-E3 | mb  | YFP | - | 119.529 |
| Ndc10-E3 | bm  | YFP | - | 165.496 |
| Ndc10-E3 | bb  | YFP | - | 164.07  |
| <hr/>    |     |     |   |         |
| Ndc10-E4 | 0   | YFP | - | 406.97  |
| Ndc10-E4 | m   | YFP | - | 284.036 |
| Ndc10-E4 | b   | YFP | - | 374.32  |
| Ndc10-E4 | mm  | YFP | - | 209.872 |
| Ndc10-E4 | mb  | YFP | - | 237.691 |
| Ndc10-E4 | bm  | YFP | - | 282.984 |
| Ndc10-E4 | bb  | YFP | - | 205.402 |
| <hr/>    |     |     |   |         |
| Ndc10-E5 | 0   | YFP | - | 362.048 |
| Ndc10-E5 | m   | YFP | - | 364.77  |
| Ndc10-E5 | b   | YFP | - | 286.492 |
| Ndc10-E5 | mm  | YFP | - | 182.715 |
| Ndc10-E5 | mb  | YFP | - | 336.337 |
| Ndc10-E5 | bm  | YFP | - | 102.406 |
| Ndc10-E5 | bb  | YFP | - | 143.895 |
| <hr/>    |     |     |   |         |
| Ndc10-E6 | m   | YFP | - | 301.153 |
| Ndc10-E6 | b   | YFP | - | 402.589 |
| Ndc10-E6 | mm  | YFP | - | 228.796 |
| Ndc10-E6 | mb  | YFP | - | 177.301 |
| Ndc10-E6 | bm  | YFP | - | 270.309 |
| Ndc10-E6 | bb  | YFP | - | 165.385 |
| Ndc10-E6 | mmm | YFP | - | 137.37  |
| Ndc10-E6 | mmb | YFP | - | 138.049 |
| Ndc10-E6 | mbm | YFP | - | 186.622 |

|          |     |     |   |         |
|----------|-----|-----|---|---------|
| Ndc10-E6 | mbb | YFP | - | 207.239 |
| Ndc10-E6 | bmm | YFP | - | 120.159 |
| Ndc10-E6 | bmb | YFP | - | 142.875 |
| <hr/>    |     |     |   |         |
| Ndc10-E7 | 0   | YFP | - | 795.879 |
| Ndc10-E7 | m   | YFP | - | 387.749 |
| Ndc10-E7 | b   | YFP | - | 478.167 |
| Ndc10-E7 | mm  | YFP | - | 130.403 |
| Ndc10-E7 | mb  | YFP | - | 214.287 |
| Ndc10-E7 | bm  | YFP | - | 227.378 |
| Ndc10-E7 | bb  | YFP | - | 132.299 |
| Ndc10-E8 | m   | YFP | - | 193.152 |
| Ndc10-E8 | b   | YFP | - | 109.024 |
| Ndc10-E8 | mm  | YFP | - | 72.389  |
| Ndc10-E8 | mb  | YFP | - | 122.792 |
| Ndc10-E8 | bm  | YFP | - | 208.115 |
| Ndc10-E8 | bb  | YFP | - | 117.847 |
| <hr/>    |     |     |   |         |
| Ndc10-E9 | 0   | YFP | - | 591.215 |
| Ndc10-E9 | m   | YFP | - | 247.56  |
| Ndc10-E9 | b   | YFP | - | 392.53  |
| Ndc10-E9 | mm  | YFP | - | 225.386 |
| Ndc10-E9 | mb  | YFP | - | 312.022 |
| Ndc10-E9 | bm  | YFP | - | 155.425 |
| Ndc10-E9 | bb  | YFP | - | 198.791 |

*NDC10*-tagged protein segregation in diploid cells:

These data are produced from a diploid strain W7910 (*NDC10-YFP/NDC10-CFP*).

| experiment identifier | cell nomenclature | fluorescent genotype | CFP value | YFP value |
|-----------------------|-------------------|----------------------|-----------|-----------|
| NDC10-diploid-A4      | 0                 | CFP & YFP            | 125.917   | 66.98     |
| NDC10-diploid-A4      | m                 | CFP & YFP            | 124.673   | 6.897     |
| NDC10-diploid-A4      | b                 | CFP & YFP            | 66.7      | 1.599     |
| NDC10-diploid-A5      | 0                 | CFP & YFP            | 87.267    | 27.945    |
| NDC10-diploid-A5      | m                 | CFP & YFP            | 116.102   | 19.893    |
| NDC10-diploid-A5      | b                 | CFP & YFP            | 127.642   | 17.732    |
| NDC10-diploid-A5      | mm                | CFP & YFP            | 90.205    | 8.046     |
| NDC10-diploid-A5      | mb                | CFP & YFP            | 97.15     | 7.117     |
| NDC10-diploid-A5      | bm                | CFP & YFP            | 126.738   | 21.499    |
| NDC10-diploid-A5      | bb                | CFP & YFP            | 76.655    | 6.171     |
| NDC10-diploid-A5      | mmm               | CFP & YFP            | 84.492    | 8.7       |
| NDC10-diploid-A5      | mmb               | CFP & YFP            | 75.937    | 1.227     |
| NDC10-diploid-A5      | mbm               | CFP & YFP            | 82.401    | 3.886     |
| NDC10-diploid-A5      | mbb               | CFP & YFP            | 52.46     | 7.157     |
| NDC10-diploid-A5      | bmm               | CFP & YFP            | 94.429    | 8.119     |
| NDC10-diploid-A5      | bmb               | CFP & YFP            | 84.974    | 3.912     |
| NDC10-diploid-B1      | 0                 | CFP & YFP            | 78.38     | 44.54     |
| NDC10-diploid-B1      | m                 | CFP & YFP            | 48.974    | 0.178     |
| NDC10-diploid-B1      | b                 | CFP & YFP            | 57.013    | 0         |
| NDC10-diploid-B2      | 0                 | CFP & YFP            | 81.355    | 45.864    |
| NDC10-diploid-B2      | m                 | CFP & YFP            | 58.267    | 14.486    |
| NDC10-diploid-B2      | b                 | CFP & YFP            | 71.788    | 26.534    |
| NDC10-diploid-B3      | 0                 | CFP & YFP            | 168.359   | 56.343    |
| NDC10-diploid-B3      | m                 | CFP & YFP            | 121.728   | 27.364    |
| NDC10-diploid-B3      | b                 | CFP & YFP            | 105.897   | 16.529    |
| NDC10-diploid-B4      | m                 | CFP & YFP            | 160.842   | 55.453    |
| NDC10-diploid-B4      | b                 | CFP & YFP            | 111.827   | 47.078    |
| NDC10-diploid-B4      | mm                | CFP & YFP            | 108.012   | 26.688    |
| NDC10-diploid-B4      | mb                | CFP & YFP            | 110.115   | 30.446    |
| NDC10-diploid-B4      | bm                | CFP & YFP            | 96.905    | 20.036    |
| NDC10-diploid-B4      | bb                | CFP & YFP            | 57.507    | 2.913     |

|                  |    |           |         |        |
|------------------|----|-----------|---------|--------|
| NDC10-diploid-B5 | m  | CFP & YFP | 149.764 | 43.781 |
| NDC10-diploid-B5 | b  | CFP & YFP | 112.542 | 66.485 |
| NDC10-diploid-B5 | mm | CFP & YFP | 79.781  | 21.793 |
| NDC10-diploid-B5 | mb | CFP & YFP | 102.461 | 19.092 |
| NDC10-diploid-B5 | bm | CFP & YFP | 86.731  | 35.189 |
| NDC10-diploid-B5 | bb | CFP & YFP | 78.659  | 9.684  |
| NDC10-diploid-B6 | 0  | CFP & YFP | 62.204  | 32.287 |
| NDC10-diploid-B6 | m  | CFP & YFP | 117.082 | 41.034 |
| NDC10-diploid-B6 | b  | CFP & YFP | 92.294  | 31.019 |
| NDC10-diploid-B7 | 0  | CFP & YFP | 108.401 | 24.347 |
| NDC10-diploid-B7 | m  | CFP & YFP | 90.259  | 35.497 |
| NDC10-diploid-B7 | b  | CFP & YFP | 110.466 | 42.659 |
| NDC10-diploid-B7 | mm | CFP & YFP | 99.986  | 11.319 |
| NDC10-diploid-B7 | mb | CFP & YFP | 96.827  | 10.578 |
| NDC10-diploid-B8 | 0  | CFP & YFP | 103.347 | 68.737 |
| NDC10-diploid-B8 | m  | CFP & YFP | 93.235  | 21.942 |
| NDC10-diploid-B8 | b  | CFP & YFP | 69.385  | 6.659  |
| NDC10-diploid-C1 | 0  | CFP & YFP | 156.295 | 39.9   |
| NDC10-diploid-C1 | m  | CFP & YFP | 102.631 | 9.143  |
| NDC10-diploid-C1 | b  | CFP & YFP | 202.732 | 45.895 |
| NDC10-diploid-C1 | mm | CFP & YFP | 129.532 | 25.581 |
| NDC10-diploid-C1 | mb | CFP & YFP | 125.374 | 32.974 |
| NDC10-diploid-C1 | bm | CFP & YFP | 164.855 | 35.675 |
| NDC10-diploid-C1 | bb | CFP & YFP | 122.904 | 15.651 |
| NDC10-diploid-C7 | 0  | CFP & YFP | 75.807  | 20.035 |
| NDC10-diploid-C7 | m  | CFP & YFP | 80.405  | 15.187 |
| NDC10-diploid-C7 | b  | CFP & YFP | 93.04   | 37.613 |
| NDC10-diploid-C7 | mm | CFP & YFP | 140.468 | 36.073 |
| NDC10-diploid-C7 | mb | CFP & YFP | 126.211 | 28.023 |
| NDC10-diploid-C7 | bm | CFP & YFP | 148.868 | 30.609 |
| NDC10-diploid-C7 | bb | CFP & YFP | 138.385 | 28.751 |

*NDC10*-tagged protein segregation in spores:

These data are produced from spores that are derived from a diploid strain W7910 (*NDC10-YFP/NDC10-CFP*).

| experiment identifier | cell nomenclature | fluorescent genotype | CFP value | YFP value |
|-----------------------|-------------------|----------------------|-----------|-----------|
| NDC10-B2-1            | 0                 | CFP                  | 460.718   | 22.841    |
| NDC10-B2-1            | m                 | CFP                  | 236.364   | 22.912    |
| NDC10-B2-1            | b                 | CFP                  | 154.634   | 7.347     |
| NDC10-B2-1            | mm                | CFP                  | 283.3     | 29.403    |
| NDC10-B2-1            | mb                | CFP                  | 137.746   | 7.539     |
| NDC10-B2-1            | bm                | CFP                  | 142.857   | 5.203     |
| NDC10-B2-1            | bb                | CFP                  | 150.112   | 14.204    |
| NDC10-B2-1            | mmm               | CFP                  | 265.591   | 20.527    |
| NDC10-B2-1            | mmb               | CFP                  | 187.049   | 9.962     |
| NDC10-B2-1            | mbm               | CFP                  | 200.74    | 12.475    |
| NDC10-B2-1            | mbb               | CFP                  | 154.559   | 9.221     |
| NDC10-B2-2            | 0                 | CFP                  | 346.936   | 21.102    |
| NDC10-B2-2            | m                 | CFP                  | 290.15    | 29.847    |
| NDC10-B2-2            | b                 | CFP                  | 160.252   | 15.44     |
| NDC10-B2-2            | mm                | CFP                  | 271.154   | 26.688    |
| NDC10-B2-2            | mb                | CFP                  | 184.048   | 11.777    |
| NDC10-B2-2            | bm                | CFP                  | 146.367   | 7.094     |
| NDC10-B2-2            | bb                | CFP                  | 108.368   | 4.558     |
| NDC10-C4              | m                 | YFP                  | 193.351   | 100.578   |
| NDC10-C4              | b                 | YFP                  | 92.567    | 81.422    |
| NDC10-C4              | mm                | YFP                  | 143.454   | 31.709    |
| NDC10-C4              | mb                | YFP                  | 66.712    | 27.646    |
| NDC10-C4              | bm                | YFP                  | 80.825    | 36.524    |
| NDC10-C4              | bb                | YFP                  | 77.008    | 26.572    |
| NDC10-C5              | 0                 | YFP                  | 135.247   | 9.466     |
| NDC10-C5              | m                 | YFP                  | 164.656   | 35.522    |
| NDC10-C5              | b                 | YFP                  | 80.25     | 18.721    |
| NDC10-C5              | mm                | YFP                  | 199.443   | 12.808    |
| NDC10-C5              | mb                | YFP                  | 92.124    | 27.557    |
| NDC10-C5              | bm                | YFP                  | 107.677   | 7.915     |
| NDC10-C5              | bb                | YFP                  | 77.73     | 17.75     |

|          |       |     |         |         |
|----------|-------|-----|---------|---------|
| NDC10-C9 | 0     | YFP | 466.268 | 178.582 |
| NDC10-C9 | m     | YFP | 896.019 | 129.263 |
| NDC10-C9 | b     | YFP | 97.706  | 65.612  |
| NDC10-C9 | mm    | YFP | 407.618 | 31.062  |
| NDC10-C9 | mb    | YFP | 162.942 | 12.317  |
| NDC10-C9 | bm    | YFP | 133.263 | 45.26   |
| NDC10-C9 | bb    | YFP | 86.045  | 30.919  |
| NDC10-C9 | bmm   | YFP | 96.002  | 6.122   |
| NDC10-C9 | bmb   | YFP | 81.085  | 14.458  |
| NDC10-D4 | 0     | CFP | 111.164 | 10.211  |
| NDC10-D4 | m     | CFP | 139.421 | 4.644   |
| NDC10-D4 | b     | CFP | 128.33  | 10.38   |
| NDC10-D4 | mm    | CFP | 57.857  | 6.734   |
| NDC10-D4 | mb    | CFP | 73.492  | 9.321   |
| NDC10-E3 | m     | CFP | 150.134 | 10.524  |
| NDC10-E3 | b     | CFP | 167.556 | 3.649   |
| NDC10-E3 | bm    | CFP | 152.755 | 0       |
| NDC10-E3 | bb    | CFP | 62.649  | 0       |
| NDC10-E3 | mmm   | CFP | 165.156 | 5.135   |
| NDC10-E3 | mmb   | CFP | 168.471 | 2.333   |
| NDC10-E3 | mbm   | CFP | 104.283 | 6.293   |
| NDC10-E3 | mhb   | CFP | 132.599 | 5.766   |
| NDC10-E3 | bmm   | CFP | 164.448 | 0       |
| NDC10-E3 | bmb   | CFP | 143.094 | 0       |
| NDC10-E3 | bbm   | CFP | 104.182 | 0       |
| NDC10-E3 | bbb   | CFP | 78.454  | 0       |
| NDC10-E3 | mmmm  | CFP | 152.845 | 6.892   |
| NDC10-E3 | mmmb  | CFP | 145.348 | 14.604  |
| NDC10-E3 | mbmm  | CFP | 86.178  | 5.075   |
| NDC10-E3 | mbmb  | CFP | 80.894  | 6.309   |
| NDC10-E3 | mhbmm | CFP | 135.617 | 4.94    |
| NDC10-E3 | mhbhb | CFP | 129.79  | 11.139  |
| NDC10-E4 | mm    | CFP | 115.827 | 10.644  |
| NDC10-E4 | mb    | CFP | 117.138 | 0       |
| NDC10-E4 | bm    | CFP | 97.747  | 0       |

|          |      |     |         |        |
|----------|------|-----|---------|--------|
| NDC10-E4 | bb   | CFP | 110.678 | 11.046 |
| NDC10-E4 | mmm  | CFP | 84.37   | 1.256  |
| NDC10-E4 | mmb  | CFP | 76.221  | 7.236  |
| NDC10-E4 | bmm  | CFP | 89.297  | 7.172  |
| NDC10-E4 | bmb  | CFP | 78.787  | 0      |
| NDC10-E4 | bbm  | CFP | 74.017  | 2.954  |
| NDC10-E4 | bbb  | CFP | 68.358  | 5.221  |
| NDC10-E4 | mmmm | CFP | 120.73  | 3.56   |
| NDC10-E4 | mmmb | CFP | 116.168 | 5.473  |
| NDC10-E4 | mmbm | CFP | 101.228 | 9.424  |
| NDC10-E4 | mmbb | CFP | 74.935  | 0      |
| NDC10-E5 | mm   | CFP | 238.184 | 17.987 |
| NDC10-E5 | mb   | CFP | 136.699 | 8.724  |
| NDC10-E5 | bm   | CFP | 124.267 | 2.519  |
| NDC10-E5 | bb   | CFP | 124.309 | 6.513  |
| NDC10-E5 | mmm  | CFP | 212.167 | 15.764 |
| NDC10-E5 | mmb  | CFP | 105.345 | 5.08   |
| NDC10-E5 | mbm  | CFP | 154.828 | 1.341  |
| NDC10-E5 | mbb  | CFP | 102.443 | 2.085  |
| NDC10-E5 | bmm  | CFP | 135.843 | 0      |
| NDC10-E5 | bmb  | CFP | 109.188 | 7.638  |
| NDC10-E5 | bbm  | CFP | 92.14   | 0      |
| NDC10-E5 | bbb  | CFP | 94.678  | 0      |
| NDC10-E6 | mm   | YFP | 197.16  | 59.463 |
| NDC10-E6 | mb   | YFP | 75.675  | 45.014 |
| NDC10-E6 | bm   | YFP | 94.339  | 41.69  |
| NDC10-E6 | bb   | YFP | 61.707  | 40.102 |
| NDC10-E6 | mmm  | YFP | 205.617 | 36.218 |
| NDC10-E6 | mmb  | YFP | 160.501 | 13.44  |
| NDC10-E6 | mbm  | YFP | 72.581  | 23.463 |
| NDC10-E6 | mbb  | YFP | 94.425  | 16.012 |
| NDC10-E6 | bmm  | YFP | 99.271  | 18.712 |
| NDC10-E6 | bmb  | YFP | 82.243  | 13.196 |
| NDC10-E6 | bbm  | YFP | 80.788  | 20.931 |
| NDC10-E6 | bbb  | YFP | 76.805  | 27.986 |

|          |       |     |         |        |
|----------|-------|-----|---------|--------|
| NDC10-E7 | mm    | YFP | 190.076 | 64.811 |
| NDC10-E7 | mb    | YFP | 50.199  | 48.332 |
| NDC10-E7 | bm    | YFP | 67.672  | 45.727 |
| NDC10-E7 | bb    | YFP | 67.847  | 41.774 |
| NDC10-E7 | mmm   | YFP | 116.6   | 33.836 |
| NDC10-E7 | mmb   | YFP | 89.333  | 36.443 |
| NDC10-E7 | mbm   | YFP | 48.393  | 39.399 |
| NDC10-E7 | mbb   | YFP | 79.889  | 5.443  |
| <hr/>    |       |     |         |        |
| NDC10-E8 | mm    | YFP | 193.924 | 45.589 |
| NDC10-E8 | mb    | YFP | 125.624 | 52.242 |
| NDC10-E8 | bm    | YFP | 108.56  | 20.607 |
| NDC10-E8 | bb    | YFP | 43.018  | 66.596 |
| NDC10-E8 | mmm   | YFP | 189.878 | 37.167 |
| NDC10-E8 | mmb   | YFP | 147.857 | 10.464 |
| NDC10-E8 | mbm   | YFP | 76.375  | 19.7   |
| NDC10-E8 | mbb   | YFP | 64.748  | 19.962 |
| NDC10-E8 | bmm   | YFP | 64.226  | 10.396 |
| NDC10-E8 | bmb   | YFP | 51.484  | 21.893 |
| NDC10-E8 | bbm   | YFP | 101.772 | 10.932 |
| NDC10-E8 | bbb   | YFP | 41.692  | 16.094 |
| <hr/>    |       |     |         |        |
| NDC10-E9 | mbm   | YFP | 72.214  | 33.478 |
| NDC10-E9 | mbb   | YFP | 58.828  | 32.337 |
| NDC10-E9 | bmm   | YFP | 42.171  | 37.927 |
| NDC10-E9 | bmb   | YFP | 49.054  | 14.355 |
| NDC10-E9 | bbm   | YFP | 61.821  | 43.392 |
| NDC10-E9 | bbb   | YFP | 67.225  | 43.387 |
| NDC10-E9 | mmmm  | YFP | 104.496 | 32.269 |
| NDC10-E9 | mmmb  | YFP | 51.651  | 21.941 |
| NDC10-E9 | mbmm  | YFP | 76.225  | 27.391 |
| NDC10-E9 | mbmb  | YFP | 87.015  | 12.108 |
| NDC10-E9 | mbbm  | YFP | 59.846  | 23.168 |
| NDC10-E9 | mbbb  | YFP | 75.541  | 18.091 |
| NDC10-E9 | bmbmb | YFP | 52.585  | 32.99  |
| NDC10-E9 | bmbb  | YFP | 37.726  | 28.045 |
| NDC10-E9 | bmmm  | YFP | 65.061  | 17.809 |



|          |       |     |         |         |
|----------|-------|-----|---------|---------|
| NDC10-E9 | bmbb  | YFP | 56.085  | 26.633  |
| NDC10-E9 | mmmmm | YFP | 142.386 | 45.432  |
| NDC10-E9 | mmmbb | YFP | 62.563  | 6.177   |
| NDC10-F1 | mmm   | CFP | 141.471 | 6.168   |
| NDC10-F1 | mmb   | CFP | 65.665  | 4.367   |
| NDC10-F1 | mbm   | CFP | 68.748  | 3.681   |
| NDC10-F1 | mbb   | CFP | 66.87   | 1.478   |
| NDC10-F1 | bmm   | CFP | 103.356 | 1.155   |
| NDC10-F1 | bmb   | CFP | 48.744  | 0.376   |
| NDC10-F1 | bbm   | CFP | 109.386 | 0       |
| NDC10-F1 | bbb   | CFP | 89.41   | 4.103   |
| NDC10-F1 | mmmm  | CFP | 146.817 | 8.802   |
| NDC10-F1 | mmmb  | CFP | 74.811  | 1.353   |
| NDC10-F3 | mm    | YFP | 116.513 | 98.381  |
| NDC10-F3 | mb    | YFP | 56.05   | 69.275  |
| NDC10-F3 | bm    | YFP | 74.782  | 18.577  |
| NDC10-F3 | bb    | YFP | 55.036  | 108.867 |
| NDC10-F3 | mmm   | YFP | 205.573 | 17.283  |
| NDC10-F3 | mmb   | YFP | 145.866 | 43.57   |
| NDC10-F3 | mbm   | YFP | 49.009  | 43.082  |
| NDC10-F3 | mbb   | YFP | 54.527  | 36.479  |
| NDC10-F3 | bmm   | YFP | 98.602  | 53.374  |
| NDC10-F3 | bmb   | YFP | 81.941  | 47.621  |
| NDC10-F3 | bbm   | YFP | 80.037  | 32.328  |
| NDC10-F3 | bbb   | YFP | 86.282  | 41.858  |
| NDC10-F3 | mbmm  | YFP | 93.052  | 23.871  |
| NDC10-F3 | mbmb  | YFP | 59.702  | 17.248  |
| NDC10-F3 | bmmm  | YFP | 116.826 | 16.195  |
| NDC10-F3 | bmbb  | YFP | 89.265  | 28.235  |
| NDC10-F3 | bmbm  | YFP | 112.736 | 19.325  |
| NDC10-F3 | bmbb  | YFP | 89.152  | 10.246  |
| NDC10-F4 | mm    | CFP | 113.176 | 7.357   |
| NDC10-F4 | mb    | CFP | 91.154  | 11.061  |
| NDC10-F4 | bm    | CFP | 48.768  | 8.454   |
| NDC10-F4 | bb    | CFP | 43.225  | 12.313  |

|          |      |     |         |        |
|----------|------|-----|---------|--------|
| NDC10-F4 | mmm  | CFP | 159.895 | 8.107  |
| NDC10-F4 | mmb  | CFP | 81.324  | 0      |
| NDC10-F4 | mbm  | CFP | 111.916 | 0.926  |
| NDC10-F4 | mbb  | CFP | 70.228  | 3.915  |
| NDC10-F4 | bmm  | CFP | 84.223  | 8.613  |
| NDC10-F4 | bmb  | CFP | 92.918  | 11.485 |
| NDC10-F4 | bbm  | CFP | 81.997  | 11.147 |
| NDC10-F4 | bbb  | CFP | 101.758 | 8.918  |
| NDC10-F4 | mmbm | CFP | 101.902 | 10.837 |
| NDC10-F4 | mmbb | CFP | 126.62  | 12.529 |
| NDC10-F4 | mbmm | CFP | 122.833 | 9.276  |
| NDC10-F4 | mbmb | CFP | 108.962 | 13.201 |
| NDC10-F4 | mbbm | CFP | 108.053 | 6.079  |
| NDC10-F4 | mbbb | CFP | 121.166 | 8.395  |
| NDC10-F6 | mm   | YFP | 152.999 | 75.948 |
| NDC10-F6 | mb   | YFP | 45.476  | 68.252 |
| NDC10-F6 | bm   | YFP | 91.716  | 42.799 |
| NDC10-F6 | bb   | YFP | 63.109  | 58.437 |
| NDC10-F6 | mmm  | YFP | 465.819 | 38.188 |
| NDC10-F6 | mmb  | YFP | 83.042  | 36.702 |
| NDC10-F6 | bmm  | YFP | 62.652  | 30.526 |
| NDC10-F6 | bmb  | YFP | 84.629  | 36.223 |
| NDC10-F6 | bbm  | YFP | 41.363  | 21.579 |
| NDC10-F6 | bbb  | YFP | 60.466  | 31.631 |
| NDC10-F7 | mm   | YFP | 254.953 | 23.696 |
| NDC10-F7 | mb   | YFP | 88.726  | 71.293 |
| NDC10-F7 | bm   | YFP | 84.794  | 28.832 |
| NDC10-F7 | bb   | YFP | 60.708  | 30.851 |
| NDC10-F7 | mmm  | YFP | 195.587 | 28.66  |
| NDC10-F7 | mmb  | YFP | 138.012 | 32.507 |
| NDC10-F7 | mbm  | YFP | 86.875  | 30.581 |
| NDC10-F7 | mbb  | YFP | 67.538  | 29.832 |
| NDC10-F7 | bmm  | YFP | 79.19   | 11.014 |
| NDC10-F7 | bmb  | YFP | 48.611  | 14.339 |
| NDC10-F7 | bbm  | YFP | 80.495  | 33.481 |

|          |      |     |         |        |
|----------|------|-----|---------|--------|
| NDC10-F7 | bbb  | YFP | 106.943 | 29.952 |
| NDC10-F7 | mmmm | YFP | 206.302 | 32.357 |
| NDC10-F7 | mmmb | YFP | 173.169 | 25.742 |
| NDC10-F7 | bmbm | YFP | 83.035  | 25.555 |
| NDC10-F7 | bmbb | YFP | 67.954  | 18.716 |
| NDC10-F8 | mm   | CFP | 247.314 | 12.662 |
| NDC10-F8 | mb   | CFP | 100.664 | 1.75   |
| NDC10-F8 | bm   | CFP | 150.673 | 8.926  |
| NDC10-F8 | bb   | CFP | 112.074 | 3.255  |
| NDC10-F8 | mmm  | CFP | 568.44  | 60.659 |
| NDC10-F8 | mmb  | CFP | 136.38  | 0      |
| NDC10-F8 | mbm  | CFP | 119.016 | 0      |
| NDC10-F8 | mbb  | CFP | 118.868 | 1.285  |
| NDC10-F9 | mm   | YFP | 186.398 | 25.921 |
| NDC10-F9 | mb   | YFP | 57.784  | 59.821 |
| NDC10-F9 | bm   | YFP | 38.704  | 59.518 |
| NDC10-F9 | bb   | YFP | 11.042  | 0      |
| NDC10-F9 | mmm  | YFP | 211.547 | 20.81  |
| NDC10-F9 | mmb  | YFP | 48.929  | 37.379 |
| NDC10-F9 | mbm  | YFP | 59.44   | 35.554 |
| NDC10-F9 | mbb  | YFP | 58.033  | 25.142 |
| NDC10-F9 | bmm  | YFP | 24.483  | 17.176 |
| NDC10-F9 | bmb  | YFP | 40.053  | 51.852 |
| NDC10-F9 | bbm  | YFP | 41.83   | 14.755 |
| NDC10-F9 | bbb  | YFP | 39.899  | 13.459 |
| NDC10-F9 | mmmm | YFP | 182.852 | 33.826 |
| NDC10-F9 | mmmb | YFP | 69.642  | 35.568 |
| NDC10-F9 | mmbm | YFP | 94.141  | 16.81  |
| NDC10-F9 | mmbb | YFP | 82.76   | 26.89  |
| NDC10-F9 | mbbm | YFP | 67.403  | 25.324 |
| NDC10-F9 | mbbb | YFP | 82.781  | 38.993 |
| NDC10-F9 | bmmm | YFP | 50.463  | 32.384 |
| NDC10-F9 | bmbb | YFP | 24.473  | 27.792 |
| NDC10-F9 | bmbm | YFP | 85.331  | 5.307  |
| NDC10-F9 | bmbb | YFP | 82.797  | 15.193 |

|          |       |     |        |       |
|----------|-------|-----|--------|-------|
| NDC10-F9 | bmmmm | YFP | 63.335 | 9.997 |
| NDC10-F9 | bmmmb | YFP | 48.616 | 4.178 |

---

*CTF19*-tagged protein segregation in haploid cells:

These data are produced from two haploid strains, W7873-3D (*CTF19-YFP*) and W7874-4D (*CTF19-CFP*).

| experiment identifier | cell nomenclature | fluorescent genotype | CFP value | YFP value |
|-----------------------|-------------------|----------------------|-----------|-----------|
| CTF19hap-A1           | 0                 | CFP                  | 302.813   | -         |
| CTF19hap-A1           | m                 | CFP                  | 257.196   | -         |
| CTF19hap-A1           | b                 | CFP                  | 335.269   | -         |
| CTF19hap-A2           | 0                 | CFP                  | 483.987   | -         |
| CTF19hap-A2           | m                 | CFP                  | 159.86    | -         |
| CTF19hap-A2           | b                 | CFP                  | 158.878   | -         |
| CTF19hap-A3           | 0                 | CFP                  | 338.64    | -         |
| CTF19hap-A3           | m                 | CFP                  | 372.58    | -         |
| CTF19hap-A3           | b                 | CFP                  | 359.862   | -         |
| CTF19hap-A4           | 0                 | CFP                  | 251.288   | -         |
| CTF19hap-A4           | m                 | CFP                  | 151.337   | -         |
| CTF19hap-A4           | b                 | CFP                  | 235.234   | -         |
| CTF19hap-A5           | 0                 | CFP                  | 544.263   | -         |
| CTF19hap-A5           | m                 | CFP                  | 353.717   | -         |
| CTF19hap-A5           | b                 | CFP                  | 477.707   | -         |
| CTF19hap-A6           | m                 | CFP                  | 286.874   | -         |
| CTF19hap-A6           | b                 | CFP                  | 277.531   | -         |
| CTF19hap-A7           | 0                 | CFP                  | 342.887   | -         |
| CTF19hap-A7           | m                 | CFP                  | 327.752   | -         |
| CTF19hap-A7           | b                 | CFP                  | 413.9     | -         |
| CTF19hap-A8           | 0                 | CFP                  | 615.612   | -         |
| CTF19hap-A8           | m                 | CFP                  | 310.67    | -         |
| CTF19hap-A8           | b                 | CFP                  | 200.339   | -         |
| CTF19hap-A9           | 0                 | CFP                  | 309.398   | -         |
| CTF19hap-A9           | m                 | CFP                  | 229.25    | -         |
| CTF19hap-A9           | b                 | CFP                  | 279.423   | -         |
| CTF19hap-B2-u         | 0                 | CFP                  | 407.72    | -         |
| CTF19hap-B2-u         | m                 | CFP                  | 202.557   | -         |
| CTF19hap-B2-u         | b                 | CFP                  | 248.236   | -         |
| CTF19hap-B2-u         | mm                | CFP                  | 252.215   | -         |
| CTF19hap-B2-u         | mb                | CFP                  | 235.212   | -         |

|               |     |     |         |   |
|---------------|-----|-----|---------|---|
| CTF19hap-B2-l | 0   | CFP | 587.846 | - |
| CTF19hap-B2-l | m   | CFP | 371.904 | - |
| CTF19hap-B2-l | b   | CFP | 435.416 | - |
| CTF19hap-B2-l | mm  | CFP | 263.006 | - |
| CTF19hap-B2-l | mb  | CFP | 303.371 | - |
| CTF19hap-B2-l | bm  | CFP | 215.119 | - |
| CTF19hap-B2-l | bb  | CFP | 257.842 | - |
| CTF19hap-B2-l | bmm | CFP | 374.459 | - |
| CTF19hap-B2-l | bmb | CFP | 291.424 | - |
| CTF19hap-B3   | 0   | CFP | 543.158 | - |
| CTF19hap-B3   | m   | CFP | 322.256 | - |
| CTF19hap-B3   | b   | CFP | 291.214 | - |
| CTF19hap-B3   | mm  | CFP | 197.069 | - |
| CTF19hap-B3   | mb  | CFP | 248.492 | - |
| CTF19hap-B3   | bm  | CFP | 199.344 | - |
| CTF19hap-B3   | bb  | CFP | 292.931 | - |
| CTF19hap-B4   | 0   | CFP | 332.903 | - |
| CTF19hap-B4   | m   | CFP | 304.063 | - |
| CTF19hap-B4   | b   | CFP | 410.406 | - |
| CTF19hap-B4   | mm  | CFP | 216.447 | - |
| CTF19hap-B4   | mb  | CFP | 297.941 | - |
| CTF19hap-B4   | bm  | CFP | 308.815 | - |
| CTF19hap-B4   | bb  | CFP | 213.022 | - |
| CTF19hap-B4   | mmm | CFP | 182.708 | - |
| CTF19hap-B4   | mmb | CFP | 177.288 | - |
| CTF19hap-B5-l | 0   | CFP | 468.672 | - |
| CTF19hap-B5-l | m   | CFP | 304.412 | - |
| CTF19hap-B5-l | b   | CFP | 185.964 | - |
| CTF19hap-B5-l | mm  | CFP | 157.551 | - |
| CTF19hap-B5-l | mb  | CFP | 285.23  | - |
| CTF19hap-B5-r | 0   | CFP | 410.557 | - |
| CTF19hap-B5-r | m   | CFP | 257.466 | - |
| CTF19hap-B5-r | b   | CFP | 269.182 | - |
| CTF19hap-B5-r | mm  | CFP | 392.394 | - |
| CTF19hap-B5-r | mb  | CFP | 221.195 | - |

|               |     |     |         |         |
|---------------|-----|-----|---------|---------|
| CTF19hap-B5-r | bm  | CFP | 159.567 | -       |
| CTF19hap-B5-r | bb  | CFP | 180.189 | -       |
| CTF19hap-B5-r | mmm | CFP | 173.565 | -       |
| CTF19hap-B5-r | mmb | CFP | 197.518 | -       |
| CTF19hap-B5-r | mbm | CFP | 130.427 | -       |
| CTF19hap-B5-r | mbb | CFP | 135.714 | -       |
| CTF19hap-B6   | 0   | CFP | 492.755 | -       |
| CTF19hap-B6   | m   | CFP | 298.473 | -       |
| CTF19hap-B6   | b   | CFP | 358.974 | -       |
| CTF19hap-B6   | mm  | CFP | 258.693 | -       |
| CTF19hap-B6   | mb  | CFP | 281.933 | -       |
| CTF19hap-B7   | 0   | CFP | 430.898 | -       |
| CTF19hap-B7   | m   | CFP | 271.851 | -       |
| CTF19hap-B7   | b   | CFP | 394.787 | -       |
| CTF19hap-B7   | mm  | CFP | 186.074 | -       |
| CTF19hap-B7   | mb  | CFP | 309.983 | -       |
| CTF19hap-B7   | bm  | CFP | 201.709 | -       |
| CTF19hap-B7   | bb  | CFP | 279.475 | -       |
| CTF19hap-B7   | mbm | CFP | 231.363 | -       |
| CTF19hap-B7   | mbb | CFP | 242.662 | -       |
| CTF19hap-B7   | bmm | CFP | 199.058 | -       |
| CTF19hap-B7   | bmb | CFP | 197.714 | -       |
| CTF19hap-B7   | bbm | CFP | 181.092 | -       |
| CTF19hap-B7   | bbb | CFP | 176.454 | -       |
| CTF19hap-B8   | 0   | CFP | 695.837 | -       |
| CTF19hap-B8   | m   | CFP | 346.869 | -       |
| CTF19hap-B8   | b   | CFP | 431.691 | -       |
| CTF19hap-B8   | bm  | CFP | 283.99  | -       |
| CTF19hap-B8   | bb  | CFP | 305.602 | -       |
| CTF19hap-C2   | 0   | YFP | -       | 318.673 |
| CTF19hap-C2   | m   | YFP | -       | 217.885 |
| CTF19hap-C2   | b   | YFP | -       | 289.289 |
| CTF19hap-C2   | mm  | YFP | -       | 330.428 |
| CTF19hap-C2   | mb  | YFP | -       | 257.329 |
| CTF19hap-C2   | bm  | YFP | -       | 354.273 |

|             |    |     |   |         |
|-------------|----|-----|---|---------|
| CTF19hap-C2 | bb | YFP | - | 291.792 |
| CTF19hap-C3 | m  | YFP | - | 352.335 |
| CTF19hap-C3 | b  | YFP | - | 452.185 |
| CTF19hap-C6 | m  | YFP | - | 188.678 |
| CTF19hap-C6 | b  | YFP | - | 171.882 |
| CTF19hap-C6 | bm | YFP | - | 113.24  |
| CTF19hap-C6 | bb | YFP | - | 135.678 |
| CTF19hap-C7 | 0  | YFP | - | 486.69  |
| CTF19hap-C7 | m  | YFP | - | 120.571 |
| CTF19hap-C7 | b  | YFP | - | 196.043 |
| CTF19hap-C7 | mm | YFP | - | 111.104 |
| CTF19hap-C7 | mb | YFP | - | 115.486 |
| CTF19hap-C7 | bm | YFP | - | 241.392 |
| CTF19hap-C7 | bb | YFP | - | 124.099 |
| CTF19hap-C9 | 0  | YFP | - | 259.097 |
| CTF19hap-C9 | m  | YFP | - | 151.209 |
| CTF19hap-C9 | b  | YFP | - | 174.264 |
| CTF19hap-C9 | bm | YFP | - | 150.931 |
| CTF19hap-C9 | bb | YFP | - | 113.157 |
| CTF19hap-D1 | 0  | YFP | - | 319.478 |
| CTF19hap-D1 | m  | YFP | - | 332.958 |
| CTF19hap-D1 | b  | YFP | - | 333.616 |
| CTF19hap-D1 | mm | YFP | - | 125.035 |
| CTF19hap-D1 | mb | YFP | - | 179.283 |
| CTF19hap-D1 | bm | YFP | - | 141.115 |
| CTF19hap-D1 | bb | YFP | - | 169.175 |
| CTF19hap-D2 | 0  | YFP | - | 355.238 |
| CTF19hap-D2 | m  | YFP | - | 121.667 |
| CTF19hap-D2 | b  | YFP | - | 106.412 |
| CTF19hap-D2 | mm | YFP | - | 90.458  |
| CTF19hap-D2 | mb | YFP | - | 136.384 |
| CTF19hap-D2 | bm | YFP | - | 82.847  |
| CTF19hap-D2 | bb | YFP | - | 120.136 |
| CTF19hap-D3 | m  | YFP | - | 223.149 |
| CTF19hap-D3 | b  | YFP | - | 387.963 |



|               |     |     |   |         |
|---------------|-----|-----|---|---------|
| CTF19hap-D3   | mm  | YFP | - | 156.615 |
| CTF19hap-D3   | mb  | YFP | - | 179.695 |
| CTF19hap-D3   | bm  | YFP | - | 126.71  |
| CTF19hap-D3   | bb  | YFP | - | 128.187 |
| CTF19hap-D3   | mmm | YFP | - | 88.487  |
| CTF19hap-D3   | mmb | YFP | - | 107.669 |
| CTF19hap-D4   | m   | YFP | - | 205.459 |
| CTF19hap-D4   | b   | YFP | - | 247.701 |
| CTF19hap-D4   | mm  | YFP | - | 87.124  |
| CTF19hap-D4   | mb  | YFP | - | 90.746  |
| CTF19hap-D4   | bm  | YFP | - | 86.869  |
| CTF19hap-D4   | bb  | YFP | - | 160.603 |
| CTF19hap-D4   | mmm | YFP | - | 84.393  |
| CTF19hap-D4   | mmb | YFP | - | 118.971 |
| CTF19hap-D5-l | 0   | YFP | - | 220.68  |
| CTF19hap-D5-l | m   | YFP | - | 156.711 |
| CTF19hap-D5-l | b   | YFP | - | 267.265 |
| CTF19hap-D5-r | 0   | YFP | - | 252.167 |
| CTF19hap-D5-r | m   | YFP | - | 149.926 |
| CTF19hap-D5-r | b   | YFP | - | 182.403 |
| CTF19hap-D5-r | mm  | YFP | - | 140.522 |
| CTF19hap-D5-r | mb  | YFP | - | 140.755 |
| CTF19hap-D5-r | mmm | YFP | - | 147.437 |
| CTF19hap-D5-r | mmb | YFP | - | 116.776 |
| CTF19hap-D7   | 0   | YFP | - | 280.341 |
| CTF19hap-D7   | m   | YFP | - | 116.88  |
| CTF19hap-D7   | b   | YFP | - | 169.323 |
| CTF19hap-D7   | mm  | YFP | - | 69.677  |
| CTF19hap-D7   | mb  | YFP | - | 104.048 |
| CTF19hap-D7   | bm  | YFP | - | 130.935 |
| CTF19hap-D7   | bb  | YFP | - | 131.54  |
| CTF19hap-D8   | 0   | YFP | - | 290.226 |
| CTF19hap-D8   | m   | YFP | - | 76.819  |
| CTF19hap-D8   | b   | YFP | - | 131.137 |
| CTF19hap-D9   | 0   | YFP | - | 294.688 |

|             |   |     |   |         |
|-------------|---|-----|---|---------|
| CTF19hap-D9 | m | YFP | - | 152.073 |
| CTF19hap-D9 | b | YFP | - | 225.642 |

*CTF19*-tagged protein segregation in diploid cells:

These data are produced from a diploid strain W7909 (*CTF19-YFP/CTF19-CFP*).

| experiment identifier | cell nomenclature | fluorescent genotype | CFP value | YFP value |
|-----------------------|-------------------|----------------------|-----------|-----------|
| CFT19-dip-a1          | 0                 | CFP & YFP            | 194.446   | 65.072    |
| CFT19-dip-a1          | m                 | CFP & YFP            | 157.653   | 65.179    |
| CFT19-dip-a1          | b                 | CFP & YFP            | 147.959   | 86.815    |
| CFT19-dip-a1          | mm                | CFP & YFP            | 147.274   | 20.404    |
| CFT19-dip-a1          | mb                | CFP & YFP            | 156.421   | 24.986    |
| CFT19-dip-a1          | bm                | CFP & YFP            | 165.906   | 69.007    |
| CFT19-dip-a1          | bb                | CFP & YFP            | 202.157   | 52.452    |
| CFT19-dip-a2r         | 0                 | CFP & YFP            | 127.328   | 64.563    |
| CFT19-dip-a2r         | m                 | CFP & YFP            | 182.396   | 38.316    |
| CFT19-dip-a2r         | b                 | CFP & YFP            | 127.97    | 30.739    |
| CFT19-dip-a2l         | 0                 | CFP & YFP            | 218.873   | 121.811   |
| CFT19-dip-a2l         | m                 | CFP & YFP            | 126.635   | 73.694    |
| CFT19-dip-a2l         | b                 | CFP & YFP            | 181.046   | 74.318    |
| CFT19-dip-a3l         | 0                 | CFP & YFP            | 152.864   | 74.191    |
| CFT19-dip-a3l         | m                 | CFP & YFP            | 144.979   | 27.596    |
| CFT19-dip-a3l         | b                 | CFP & YFP            | 222.421   | 46.511    |
| CFT19-dip-a3r         | 0                 | CFP & YFP            | 170.736   | 135.257   |
| CFT19-dip-a3r         | m                 | CFP & YFP            | 181.365   | 103.449   |
| CFT19-dip-a3r         | b                 | CFP & YFP            | 158.957   | 152.155   |
| CFT19-dip-a4t         | 0                 | CFP & YFP            | 197.591   | 69.253    |
| CFT19-dip-a4t         | m                 | CFP & YFP            | 180.839   | 20.516    |
| CFT19-dip-a4t         | b                 | CFP & YFP            | 183.682   | 25.119    |
| CFT19-dip-a4t         | mm                | CFP & YFP            | 130.569   | 23.358    |
| CFT19-dip-a4t         | mb                | CFP & YFP            | 109.804   | 16.196    |
| CFT19-dip-a4t         | bm                | CFP & YFP            | 97.442    | 9.168     |
| CFT19-dip-a4t         | bb                | CFP & YFP            | 102.164   | 8.086     |
| CFT19-dip-a5l         | 0                 | CFP & YFP            | 177.227   | 48.471    |
| CFT19-dip-a5l         | m                 | CFP & YFP            | 163.113   | 27.51     |
| CFT19-dip-a5l         | b                 | CFP & YFP            | 119.822   | 28.901    |
| CFT19-dip-a6r         | bm                | CFP & YFP            | 152.785   | 17.132    |
| CFT19-dip-a6r         | bb                | CFP & YFP            | 149.44    | 23.16     |

|               |     |           |         |        |
|---------------|-----|-----------|---------|--------|
| CFT19-dip-a6r | bbm | CFP & YFP | 135.263 | 12.222 |
| CFT19-dip-a6r | bbb | CFP & YFP | 93.366  | 4.624  |

*CTF19*-tagged protein segregation in spores:

These data are produced from spores that are derived from a diploid strain W7909 (*CTF19-YFP/CTF19-CFP*).

| experiment identifier | cell nomenclature | fluorescent genotype | CFP value | YFP value |
|-----------------------|-------------------|----------------------|-----------|-----------|
| CTF19-B1              | 0                 | CFP                  | 286.621   | 21.13     |
| CTF19-B1              | m                 | CFP                  | 363.049   | 47.039    |
| CTF19-B1              | b                 | CFP                  | 131.175   | 31.768    |
| CTF19-B1              | mm                | CFP                  | 198.872   | 12.884    |
| CTF19-B1              | mb                | CFP                  | 111.326   | 8.691     |
| CTF19-B1              | bm                | CFP                  | 120.658   | 7.098     |
| CTF19-B1              | bb                | CFP                  | 94.592    | 4.657     |
| CTF19-B1              | bmm               | CFP                  | 109.464   | 14.754    |
| CTF19-B1              | bmb               | CFP                  | 110.326   | 8.382     |
| CTF19-B1              | bbm               | CFP                  | 87.659    | 3.006     |
| CTF19-B1              | bbb               | CFP                  | 92.093    | 6.362     |
| CTF19-B4-y2           | 0                 | YFP                  | 386.408   | 49.584    |
| CTF19-B4-y2           | m                 | YFP                  | 538.957   | 69.138    |
| CTF19-B4-y2           | b                 | YFP                  | 104.737   | 53.9      |
| CTF19-B4-c3           | 0                 | CFP                  | 443.118   | 29.612    |
| CTF19-B4-c3           | m                 | CFP                  | 248.16    | 25.558    |
| CTF19-B4-c3           | b                 | CFP                  | 119.59    | 14.815    |
| CTF19-B4-c4           | 0                 | CFP                  | 328.414   | 29.677    |
| CTF19-B4-c4           | m                 | CFP                  | 186.559   | 6.726     |
| CTF19-B4-c4           | b                 | CFP                  | 146.026   | 12.842    |
| CTF19-B5              | m                 | YFP                  | 222.386   | 51.255    |
| CTF19-B5              | b                 | YFP                  | 92.275    | 57.645    |
| CTF19-B5              | mm                | YFP                  | 404.705   | 47.611    |
| CTF19-B5              | mb                | YFP                  | 142.433   | 11.852    |
| CTF19-B5              | bm                | YFP                  | 121.069   | 16.197    |
| CTF19-B5              | bb                | YFP                  | 106.865   | 16.203    |
| CTF19-B9              | m                 | CFP                  | 376.435   | 26.691    |
| CTF19-B9              | b                 | CFP                  | 284.845   | 13.159    |
| CTF19-B9              | mm                | CFP                  | 211.861   | 19.658    |
| CTF19-B9              | mb                | CFP                  | 192.662   | 13.005    |
| CTF19-B9              | bm                | CFP                  | 114.589   | 15.339    |

|          |       |     |         |        |
|----------|-------|-----|---------|--------|
| CTF19-B9 | bb    | CFP | 150.856 | 18.258 |
| CTF19-B9 | mmm   | CFP | 254.316 | 21.472 |
| CTF19-B9 | mmb   | CFP | 165.471 | 18.168 |
| CTF19-B9 | mbm   | CFP | 234.433 | 15.661 |
| CTF19-B9 | mbb   | CFP | 159.033 | 14.736 |
| CTF19-B9 | bmm   | CFP | 169.137 | 9.036  |
| CTF19-B9 | bmb   | CFP | 111.113 | 10.916 |
| CTF19-B9 | bbm   | CFP | 117.446 | 8.727  |
| CTF19-B9 | bbb   | CFP | 109.748 | 8.999  |
| CTF19-B9 | bmmm  | CFP | 135.59  | 5.846  |
| CTF19-B9 | bmbb  | CFP | 128.492 | 4.925  |
| CTF19-B9 | bmbmb | CFP | 157.717 | 5.283  |
| CTF19-B9 | bmbbb | CFP | 180.587 | 0      |
| CTF19-B9 | bbmm  | CFP | 69.755  | 4.842  |
| CTF19-B9 | bbmb  | CFP | 95.081  | 7.307  |
| CTF19-C1 | m     | CFP | 166.058 | 11.31  |
| CTF19-C1 | b     | CFP | 107.174 | 12.898 |
| CTF19-C1 | mm    | CFP | 172.433 | 1.857  |
| CTF19-C1 | mb    | CFP | 121.485 | 2.248  |
| CTF19-C1 | bm    | CFP | 118.711 | 0      |
| CTF19-C1 | bb    | CFP | 94.371  | 4.91   |
| CTF19-C1 | mmm   | CFP | 230.775 | 27.11  |
| CTF19-C1 | mmb   | CFP | 91.674  | 7.646  |
| CTF19-C1 | mbm   | CFP | 75.132  | 7.556  |
| CTF19-C1 | mbb   | CFP | 84.312  | 5.523  |
| CTF19-C1 | bmm   | CFP | 111.624 | 6.853  |
| CTF19-C1 | bmb   | CFP | 101.353 | 11.551 |
| CTF19-C1 | bbm   | CFP | 73.264  | 1.727  |
| CTF19-C1 | bbb   | CFP | 61.931  | 3.538  |
| CTF19-C1 | mbmm  | CFP | 77.508  | 3.548  |
| CTF19-C1 | mbmb  | CFP | 45.653  | 6.52   |
| CTF19-C2 | 0     | YFP | 176.372 | 69.676 |
| CTF19-C2 | m     | YFP | 226.929 | 68.739 |
| CTF19-C2 | b     | YFP | 81.881  | 47.607 |
| CTF19-C2 | mm    | YFP | 685.976 | 47.69  |

|          |     |     |         |        |
|----------|-----|-----|---------|--------|
| CTF19-C2 | mb  | YFP | 70.619  | 13.478 |
| CTF19-C2 | bm  | YFP | 44.681  | 12.588 |
| CTF19-C2 | bb  | YFP | 40.037  | 22.114 |
| CTF19-C3 | 0   | YFP | 89.543  | 49.031 |
| CTF19-C3 | m   | YFP | 145.829 | 50.962 |
| CTF19-C3 | b   | YFP | 45.106  | 27.482 |
| CTF19-C6 | m   | YFP | 198.287 | 38.835 |
| CTF19-C6 | b   | YFP | 85.961  | 23.046 |
| CTF19-C6 | mm  | YFP | 182.271 | 41.841 |
| CTF19-C6 | mb  | YFP | 91.269  | 27.729 |
| CTF19-C6 | bm  | YFP | 90.275  | 13.494 |
| CTF19-C6 | bb  | YFP | 80.098  | 18.502 |
| CTF19-C6 | mmm | YFP | 416.982 | 49.634 |
| CTF19-C6 | mmb | YFP | 103.786 | 6.238  |
| CTF19-C6 | mbm | YFP | 75.101  | 10.513 |
| CTF19-C6 | mbb | YFP | 85.807  | 9.113  |
| CTF19-C9 | m   | CFP | 165.574 | 16.714 |
| CTF19-C9 | b   | CFP | 76.466  | 17.263 |
| CTF19-C9 | mm  | CFP | 271.348 | 22.599 |
| CTF19-C9 | mb  | CFP | 115.566 | 2.011  |
| CTF19-C9 | bm  | CFP | 97.263  | 4.339  |
| CTF19-C9 | bb  | CFP | 89.204  | 2.852  |

TetR-RFP protein segregation in spores

These data are produced from spores that are derived from a diploid strain W8368

(*TetR-RFP/TetR-RFP*).

| experiment identifier | cell nomenclature | fluorescent genotype | RFP value |
|-----------------------|-------------------|----------------------|-----------|
| A-1                   | 0                 | RFP                  | 191.077   |
| A-1                   | m                 | RFP                  | 136.283   |
| A-1                   | b                 | RFP                  | 166.131   |
| A-1                   | mm                | RFP                  | 124.941   |
| A-1                   | mb                | RFP                  | 140.373   |
| A-2                   | m                 | RFP                  | 311.578   |
| A-2                   | b                 | RFP                  | 306.337   |
| A-2                   | bm                | RFP                  | 97.668    |
| A-2                   | bb                | RFP                  | 125.414   |
| A-3-Topright          | m                 | RFP                  | 224.129   |
| A-3-Topright          | b                 | RFP                  | 137.293   |
| A-3-bottomright       | m                 | RFP                  | 416.897   |
| A-3-bottomright       | b                 | RFP                  | 477.909   |
| A-3-center            | m                 | RFP                  | 259.082   |
| A-3-center            | b                 | RFP                  | 191.284   |
| A-3-left              | m                 | RFP                  | 306.17    |
| A-3-left              | b                 | RFP                  | 204.023   |
| A-5-bottomright       | m                 | RFP                  | 243.333   |
| A-5-bottomright       | b                 | RFP                  | 412.844   |
| A-5-topleft           | m                 | RFP                  | 731.071   |
| A-5-topleft           | b                 | RFP                  | 782.197   |
| A-6-topright          | m                 | RFP                  | 136.556   |
| A-6-topright          | b                 | RFP                  | 158.254   |
| A-6-topleft           | m                 | RFP                  | 329.616   |
| A-6-topleft           | b                 | RFP                  | 277.098   |
| A-6-bottom            | m                 | RFP                  | 335.711   |
| A-6-bottom            | b                 | RFP                  | 361.64    |
